# Supplementary material for: Taming 2,2′-biimidazole ligands in trivalent chromium complexes
Source: Royal Society of Chemistry journal article supplement (doi:10.1039/d4dt01608d), 2024-01-01
Supplement: d4dt01608d1.pdf [file d4dt01608d1.pdf]

## **Taming 2,2'-biimidazole ligands in trivalent chromium complexes†**

Julien Chong, Amina Benchohra, Céline Besnard, Laure Guénée, Arnulf Rosspeintner, Carlos M. Cruz, Juan-Ramón Jiménez, and Claude Piguet\*

### **Supporting Information**

(131 pages)

## Table of content

|                                                                                                                                                                     |         |
|---------------------------------------------------------------------------------------------------------------------------------------------------------------------|---------|
| <b>Appendix 1</b> Experimental section                                                                                                                              | S4-S12  |
| - Solvents and starting materials                                                                                                                                   | S4      |
| - Spectroscopic and analytical measurements                                                                                                                         | S4      |
| - X-ray crystallography                                                                                                                                             | S4      |
| - Synthesis of ligands and complexes.                                                                                                                               | S5      |
| <b>Appendix 2</b> Crystal structures of homoleptic chromium complexes with 2,2'biim                                                                                 | S13-S23 |
| - Crystal structure of $[\text{Cr}(\text{H}_2\text{biim})_3](\text{NO}_3)_3$ <b>1</b>                                                                               | S13     |
| - Crystal structure of $[\text{Cr}(\text{Hbiim})_3]$ <b>2</b>                                                                                                       | S14     |
| - Crystal structure of $[\text{Cr}(\text{Hbiim})_2(\text{biim})]\text{PPh}_4(\text{MeOH})$ <b>3</b>                                                                 | S16     |
| - Crystal structure of <i>cis</i> - $[\text{Cr}(\text{Me}_2\text{biim})_2\text{Cl}_2]\text{Cl}$ <b>5</b>                                                            | S18     |
| - Crystal structure of $[\text{Cr}(\text{Me}_2\text{biim})_3](\text{CF}_3\text{SO}_3)_3$ <b>6</b>                                                                   | S19     |
| - Structural analysis                                                                                                                                               | S19     |
| <b>Appendix 3</b> Crystal structures of heteroleptic chromium complexes with 2,2'biim                                                                               | S24-S27 |
| - Crystal structure of $[\text{Cr}(\text{phen})_2(\text{H}_2\text{biim})](\text{CF}_3\text{SO}_3)_3(\text{H}_2\text{O})_{0.25}$ <b>7</b>                            | S24     |
| - Crystal structure of $[\text{Cr}(\text{phen})_2(\text{Hbiim})](\text{CF}_3\text{SO}_3)_2(\text{H}_2\text{O})_{0.5}$ <b>8</b>                                      | S24     |
| - Crystal structure of $[\text{Cr}(\text{phen})_2(\text{biim})]\text{CF}_3\text{SO}_3(\text{CH}_3\text{OH})_{1.5}$ <b>9</b>                                         | S26     |
| <b>Appendix 4</b> Theoretical calculations of the electronic structures of heteroleptic complexes<br>$[\text{Cr}(\text{phen})_2(\text{H}_x\text{biim})]^{(1+x)+}$ . | S28-S49 |
| - Theoretical studies                                                                                                                                               | S28     |
| - Optimized geometries                                                                                                                                              | S29     |
| - Ab initio ligand field analysis                                                                                                                                   | S29     |
| - Complete active space analysis of excited states                                                                                                                  | S30     |
| - Electronic transitions                                                                                                                                            | S35     |
| - Cartesian coordinates                                                                                                                                             | S44     |

|                                                                                                                                   |          |
|-----------------------------------------------------------------------------------------------------------------------------------|----------|
| <b>Supporting Data Tables S1-S41 and Figures S1-S71</b>                                                                           | S50-S131 |
| - $pK_a$ values (Table S1)                                                                                                        | S50      |
| - Crystal data of $[\text{Cr}(\text{H}_2\text{biim})_3](\text{NO}_3)_3$ <b>1</b> (Tables S2-S3, Fig. S1)                          | S52      |
| - Crystal data of $[\text{Cr}(\text{Hbiim})_3]$ <b>2</b> (Tables S4-S6, Fig. S2)                                                  | S54      |
| - Crystal data of $[\text{Cr}(\text{Hbiim})_2(\text{biim})]\text{PPh}_4(\text{MeOH})$ <b>3</b> (Tables S7-S9, Fig. S3)            | S57      |
| - Crystal data of $[\text{Cr}(\text{Hbiim})_2(\text{biim})]\text{PPh}_4$ <b>4</b> (Tables S10-S12, Fig. S4)                       | S60      |
| - Crystal data of <i>cis</i> - $[\text{Cr}(\text{Me}_2\text{biim})_2\text{Cl}_2]\text{Cl}$ <b>5</b> (Tables S13-S15, Figs S5-S6)  | S63      |
| - Crystal data of $[\text{Cr}(\text{Me}_2\text{biim})_3](\text{CF}_3\text{SO}_3)_3$ <b>6</b> (Tables S16-S17, Fig. S7)            | S66      |
| - Crystal data of $[\text{Cr}(\text{phen})_2(\text{H}_2\text{biim})](\text{CF}_3\text{SO}_3)_3$ <b>7</b> (Tables S18-S20, Fig S8) | S68      |
| - Crystal data of of $[\text{Cr}(\text{phen})_2(\text{Hbiim})](\text{CF}_3\text{SO}_3)_2$ <b>8</b> (Tables S21-S23, Figs S9-S10)  | S71      |
| - Crystal data of of of $[\text{Cr}(\text{phen})_2(\text{biim})]\text{CF}_3\text{SO}_3$ <b>9</b> (Tables S24-S26, Figs S9-S11)    | S74      |
| - FT-IR spectra of homoleptic complexes (Tables S27-S32, Figs. S13-S18)                                                           | S77      |
| - ESI-MS spectra of homoleptic complexes (Tables S33-S35 , Figs S19-S38)                                                          | S84      |
| - Photophysics for homoleptic complexes <b>1-6</b> (Tables S36-S40 , Figs S39-S56)                                                | S106     |
| - FT-IR spectra of heteroleptic complexes (Fig. S57)                                                                              | S120     |
| - ESI-MS spectra of heteroleptic complexes (Table S41, Figs S58-S62)                                                              | S121     |
| - Photophysical data for heteroleptic complexes <b>7-9</b> (Figs S63-S71)                                                         | S125     |

## Appendix 1 Experimental section

### Solvents and starting materials

Chemicals were purchased from Sigma-Aldrich and Acros and used without further purification unless otherwise stated. Dry reagents were either purchased as packed under inert atmosphere with acroseal and molecular sieves present, or distilled by appropriate procedures. Dry solvents were distilled over either calcium hydride or metallic sodium.<sup>A1-1</sup> Silica-gel plates (Merck, 60 F<sub>254</sub>) were used for thin-layer chromatography, SiliaFlash<sup>®</sup> silica gel P60 (0.04-0.063 mm), and Acros silica gel 60 (0.035-0.07 mm) were used for preparative column chromatography.

### Spectroscopic and analytical measurements

<sup>1</sup>H and <sup>13</sup>C NMR spectra were recorded at 298 K on a Bruker Avance 400 MHz spectrometer equipped with BCU temperature control for variable temperature measurements. Chemical shifts are given in ppm with respect to TMS. Pneumatically-assisted electrospray (ESI-MS) mass spectra were recorded from  $\sim 1 \cdot 10^{-4}$  M (ligands) and  $\sim 1 \cdot 10^{-3}$  M (complexes) solutions on an Applied Biosystems API 150EX LC/MS System equipped with a Turbo Ionspray source. Elemental analyses were performed by K. L. Paglia from the Microchemical Laboratory of the University of Geneva. Electronic spectra in the UV-Vis region were recorded at 293 K from solutions in CH<sub>3</sub>CN with a Perkin-Elmer Lambda 1050 using quartz cells of 0.1 or 1.0 mm path length. Solid-state absorption spectra were recorded with a Perkin-Elmer Lambda 900 using capillaries.

The emission spectra were recorded using a Fluorolog (Horiba Jobin-Yvon) instrument equipped with an iHR320 imaging spectrometer, a 450 W xenon lamp illuminator (FL-1039A/40A) and a water-cooled photomultiplier tube (PMT Hamamatsu R928P). The emission spectra were corrected for the wavelength-dependent sensitivity of the PMT. Time-resolved data were collected using a digital oscilloscope (Tektronix MDO4104C) coupled to a water-cooled photomultiplier tube (PMT Hamamatsu R928P) or to a time-gated photomultiplier module (Hamamatsu H11526-20-NF). Pulsed excitation at 355 nm was achieved using the third harmonic of a pulsed Nd:YAG laser (Quantel Q-Smart 850). Variable temperature measurements were done using a closed-cycle cryosystem (Janis, CCS-900/204N) with the sample sitting in the exchange gas (helium) to achieve efficient cooling. Complexes of known corrected molecular weight were dissolved in acetonitrile to obtain  $\sim 1$  mM solutions that were immobilized in 2 mm diameter cylindrical quartz cuvettes. The cuvettes, sealed with fast drying silver agar gel were mounted on a metallic copper sample holder.

X-ray crystallography

### X-ray crystallography

Summary of crystal data, intensity measurements and structure refinements for complexes [Cr(H<sub>2</sub>biim)<sub>3</sub>](NO<sub>3</sub>)<sub>3</sub> **1**, [Cr(Hbiim)<sub>3</sub>] **2**, [Cr(Hbiim)<sub>2</sub>(biim)]PPh<sub>4</sub>(CH<sub>3</sub>OH) **3**,

[Cr(Hbiim)<sub>2</sub>(biim)]PPh<sub>4</sub> **4**, [Cr(Me<sub>2</sub>biim)<sub>3</sub>](CF<sub>3</sub>SO<sub>3</sub>)<sub>3</sub> **5**, *cis*-[Cr(Me<sub>2</sub>biim)<sub>2</sub>Cl<sub>2</sub>]Cl(CH<sub>3</sub>OH)<sub>3</sub> **6**, [Cr(phen)<sub>2</sub>(H<sub>2</sub>biim)](CF<sub>3</sub>SO<sub>3</sub>)<sub>3</sub>(H<sub>2</sub>O)<sub>0.25</sub> **7**, [Cr(phen)<sub>2</sub>(Hbiim)](CF<sub>3</sub>SO<sub>3</sub>)<sub>2</sub>(H<sub>2</sub>O)<sub>0.5</sub> **8** and [Cr(phen)<sub>2</sub>(biim)]CF<sub>3</sub>SO<sub>3</sub>(CH<sub>3</sub>OH)<sub>1.5</sub> **9** are collected in Tables S2-S26 with pertinent bond lengths, bond angles. ORTEP views with pertinent numbering schemes are gathered in Figures S1-S11. The crystals were mounted on Hampton cryoloops with protection oil. X-ray data collections were performed with a XtaLAB Synergy-S diffractometer equipped with a hybrid pixel array “hypix arc 150” detector (compounds **1-8**) or a Supernova diffractometer with an Atlas CCD camera (compound **9**). The structures were solved by using direct methods.<sup>A1-2, A1-3</sup>. Full-matrix least-square refinements on  $F^2$  were performed with SHELX2014.<sup>A1-4</sup> CCDC 2355642-2355650 contain the supplementary crystallographic data for this paper. These data can be obtained free of charge from The Cambridge Crystallographic Data Centre via <https://www.ccdc.cam.ac.uk/structures/>.

### Synthesis of ligands and complexes.

#### Synthesis of 2,2'-Biimidazole (H<sub>2</sub>biim) according to literature<sup>A1-5</sup> with modifications.

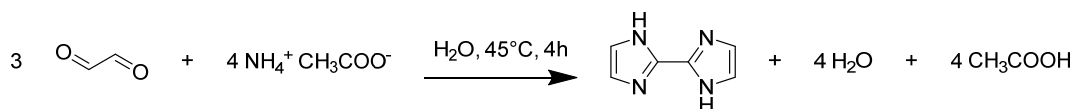

In a flask, 100g (1.3 mol) of ammonium acetate were suspended in 20ml of H<sub>2</sub>O. Aqueous glyoxal (40%-wt, 50mL, 0.44 mol) was added dropwise over the course of 2h at 45°. The brown suspension was stirred at 45° for an extra hour. The brown suspension was filtered on Büchner and washed with 200mL of H<sub>2</sub>O then with 200mL of acetone. The obtained brown crude solid product was recrystallized in 300mL of hot DMF. The product was further purified by repeating the recrystallization process a second time. The desired product was obtained as white needle-shaped crystals (5.58 g, 0.042 mol, 29% yield).

ESI-LRMS ( $m/z$ ); calculated for C<sub>6</sub>H<sub>7</sub>N<sub>4</sub><sup>+</sup>, 135.066 [H<sub>2</sub>biim+H<sup>+</sup>], found: 135.2.

<sup>1</sup>H NMR (400 MHz, DMSO)  $\delta$  12.67 (s, 2H), 7.06 (s, 4H).

#### Synthesis of 1,1'-Dimethyl-2,2'-bi-1*H*-imidazole (Me<sub>2</sub>biim) according to literature<sup>A2-6</sup> with modifications.

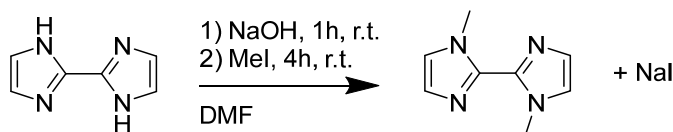

In a flask, 1.50 g (11.2 mmol) of 2,2'-biimidazole were mixed with 30 mL of DMF. To the suspension, 1.00 g (25.0 mmol, 2.24 equivalents) of solid NaOH was added. After 1 h of stirring at room temperature, 1.45 mL (23.5 mmol, 2.10 equivalents) of MeI were added. The mixture was stirred 4 h at room temperature, then 100 mL of H<sub>2</sub>O were added to the reaction mixture, which was then extracted with 3 x 100mL of CH<sub>2</sub>Cl<sub>2</sub>. The organic phase was washed with additional 100mL of H<sub>2</sub>O,

then dried with  $\text{Na}_2\text{SO}_4$ .  $\text{CH}_2\text{Cl}_2$  and the remaining DMF were evaporated under reduced pressure yielding an orange solid. The solid was recrystallized in 50 mL of acetone and 899 mg (5.54 mmol, 50% yield) of the desired product were obtained as a white crystalline solid.

ESI-LRMS ( $m/z$ ); calculated for  $\text{C}_8\text{H}_{11}\text{N}_4^+$ : 163.097 [ $\text{Me}_2\text{biim}+\text{H}^+$ ], found 163.0.

$^1\text{H}$  NMR (400 MHz,  $\text{CDCl}_3$ )  $\delta$  7.11 (d,  $J = 1.2$  Hz, 2H), 6.95 (d,  $J = 1.2$  Hz, 2H), 4.04 (s, 6H).

**Synthesis of  $[\text{Cr}(\text{H}_2\text{biim})_3](\text{NO}_3)_3$  according to literature<sup>A1-7,A1-8</sup> with modifications.**

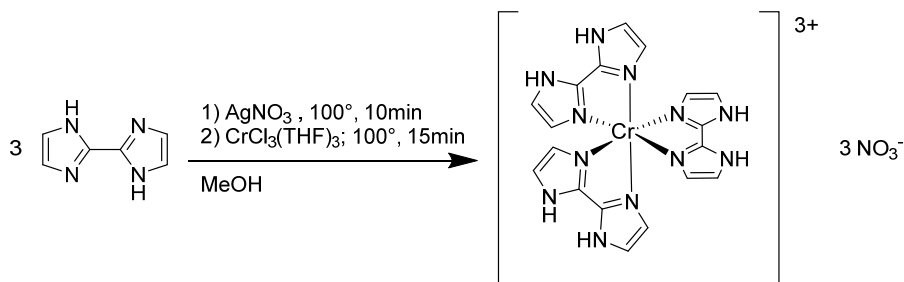

In a sealed microwave vial, 302 mg (2.25 mmol, 4.2 equivalents) of 2,2'-biimidazole and 385mg (2.27 mmol, 4.2 equivalents) of  $\text{AgNO}_3$  were added in 10 mL of MeOH. The vial was heated 10 min at  $100^\circ$  in the microwave oven to form the intermediate  $\text{Ag}(\text{H}_2\text{biim})\text{NO}_3$  as a white precipitate. 200mg (0.535 mmol) of anhydrous  $\text{CrCl}_3(\text{THF})_3$  were added and the vial was heated 15 min at  $100^\circ\text{C}$  in the microwave oven. The grey precipitate of  $\text{AgCl}$  was removed by filtration and abundantly washed with 50 mL of MeOH, then discarded. The orange filtrate was evaporated to 20 mL then put in the freezer ( $-18^\circ\text{C}$ ) overnight, 228 mg (0.357 mmol, 67% yield) of orange powder were collected after filtration. Single crystals could be obtained by vapor diffusion of  $\text{Et}_2\text{O}$  in a methanolic solution of the product.

Elemental analysis: calculated for  $[\text{Cr}(\text{H}_2\text{biim})_3](\text{NO}_3)_3 \cdot 0.9 \text{H}_2\text{O}$ : C 32.92, H 3.04, N 32.00; Found C 32.61, H 2.70, N 31.68.

ESI-MS ( $m/z$ ); calculated for  $\text{C}_{18}\text{H}_{16}\text{CrN}_{12}^+$ : 452.1021 [ $\text{Cr}(\text{H}_2\text{biim})(\text{Hbiim})_2$ ] $^+$ , found 452.103; calculated for  $\text{C}_{18}\text{H}_{17}\text{CrN}_{12}^{2+}$ : 226.5547 [ $\text{Cr}(\text{H}_2\text{biim})_2(\text{Hbiim})$ ] $^{2+}$ , found 226.555.

**Synthesis of  $[\text{Cr}(\text{Hbiim})_3]$ .**

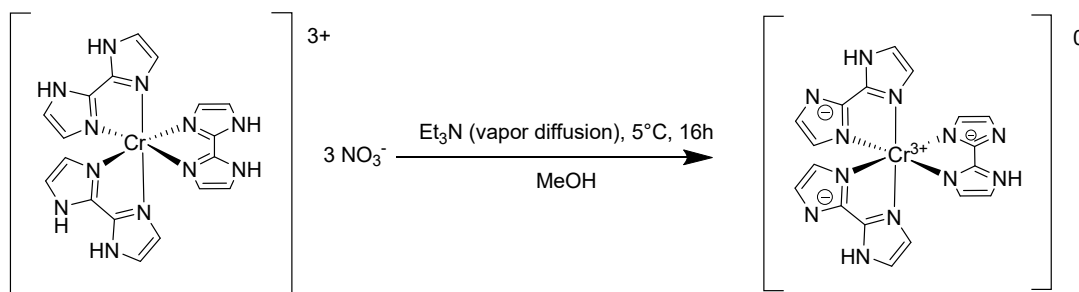

In a beaker, 100 mg (0.156 mmol) of  $[\text{Cr}(\text{H}_2\text{biim})_3](\text{NO}_3)_3$  were dissolved in 30 mL of MeOH. The beaker was placed in a bigger closed container, filled with 3mL of  $\text{Et}_3\text{N}$  in a way that allow vapor diffusion of  $\text{Et}_3\text{N}$  into the solution of complex. After 16h of vapor diffusion in the fridge ( $4^\circ\text{C}$ ), the

crystalline suspension was filtered and washed with 50 mL of MeOH yielding to 43 mg (0.0953 mmol, 61% yield) of a crystalline orange powder.

Elemental analysis: calculated for  $[\text{Cr}(\text{Hbiim})_3] \cdot 0.8 \text{ H}_2\text{O} \cdot 0.15 \text{ CH}_3\text{OH}$ : C 46.32, H 3.68, N 35.72; Found C 46.15, H 3.38, N 35.43.

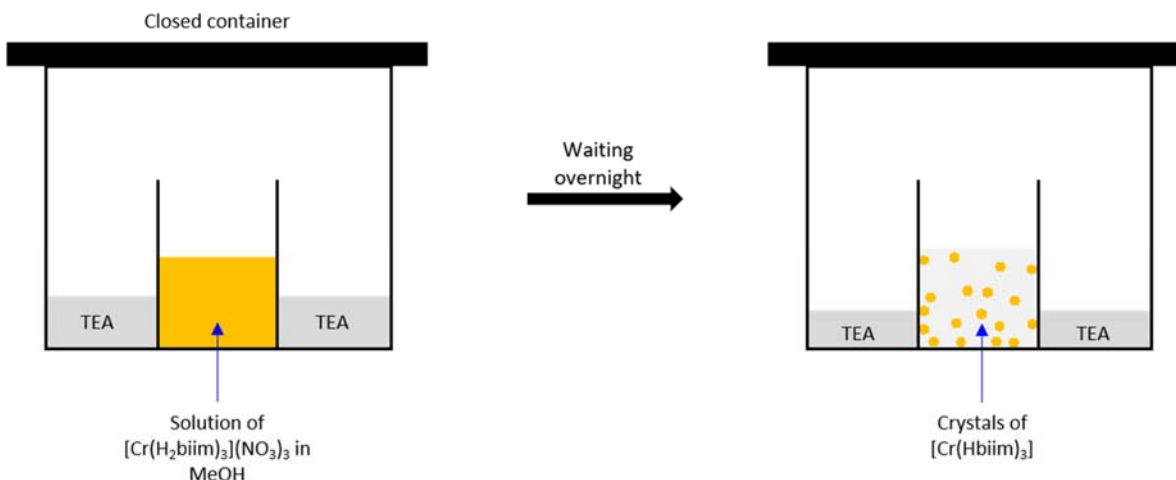

**Figure A1-1** Scheme of the vapor diffusion performed for the synthesis of  $[\text{Cr}(\text{Hbiim})_3]$ , TEA =  $\text{Et}_3\text{N}$ .

#### Synthesis of $[\text{Cr}(\text{Hbiim})_2(\text{biim})]\text{PPh}_4$ .

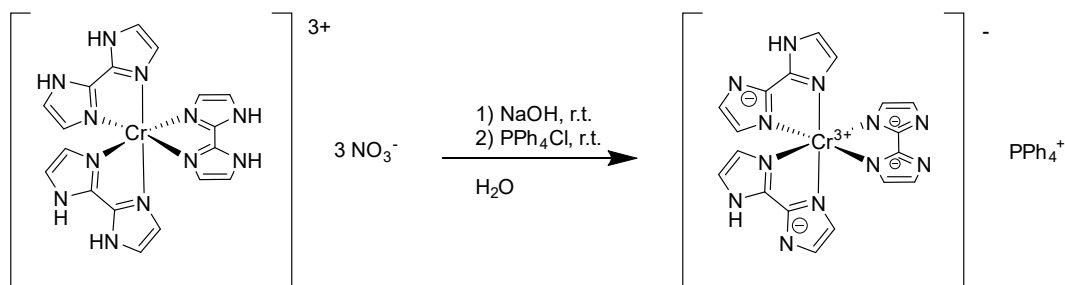

In a beaker, 50 mg (0.078 mmol) of  $\text{Cr}(\text{H}_2\text{biim})_3(\text{NO}_3)_3$  was dissolved in 2 mL of  $\text{H}_2\text{O}$  to give a clear yellow/orange solution. 2.0 mL of aqueous NaOH 1M (2.0 mmol, 26 equivalents). To the clear orange solution was added 1.0 mL of  $\text{PPh}_4\text{Cl}$  10% w/V in  $\text{H}_2\text{O}$  (0.27 mmol, 3.4 equivalents), an orange precipitate immediately formed. The suspension was filtered, the orange solid was washed with 2 x 15 mL of  $\text{H}_2\text{O}$  then dried. The obtained powder was dissolved in the minimum of MeOH (10 mL). Vapor diffusion of  ${}^t\text{BuOMe}$  into the solution led to the formation of block shaped crystals after 3 days. These crystals were then collected by filtration. 41 mg of orange crystals were obtained (0.052 mmol, yield 66%).

Elemental analysis: calculated for  $[\text{Cr}(\text{Hbiim})_2(\text{biim})]\text{PPh}_4 \cdot 0.45 \text{ H}_2\text{O}$ : C 62.86, H 4.41, N 21.07; found C 62.86, H 4.04, N 20.92.

ESI-MS ( $m/z$ ); calculated for  $\text{C}_{18}\text{H}_{14}\text{CrN}_{12}$ : 450.0875  $[\text{Cr}(\text{Hbiim})_2(\text{biim})]^-$ , found 450.087.

### Synthesis of $[\text{Cr}(\text{Me}_2\text{biim})_3](\text{CF}_3\text{SO}_3)_3$ .

Method 1:

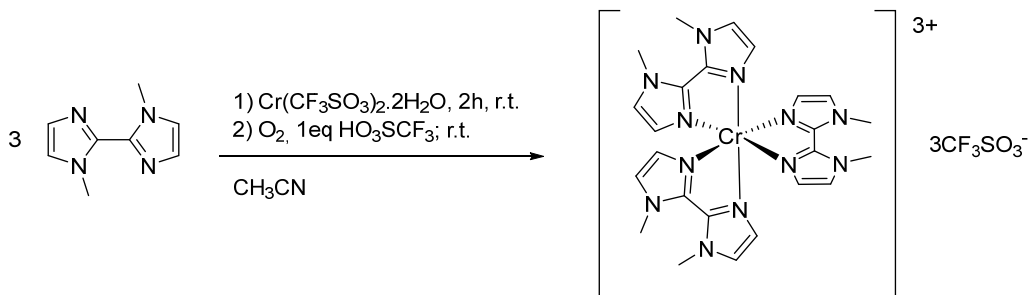

Under argon atmosphere, 100 mg (0.62 mmol, 3.3 equivalents) of  $\text{Me}_2\text{biim}$  were added in 2.4 mL of a blue solution of a  $\text{Cr}(\text{CF}_3\text{SO}_3)_2 \cdot 2\text{H}_2\text{O}$  in  $\text{CH}_3\text{CN}$   $7.8 \cdot 10^{-2}$  M (0.19 mmol) previously prepared in glovebox with distilled  $\text{CH}_3\text{CN}$  saturated in argon.<sup>A1-9</sup> The solution immediately turned red, then the solution was stirred 10 min at room temperature. The solution was then open to air and stirred 5 min to allow the oxidation in  $\text{Cr}^{3+}$ , then 5 mL of a solution of  $\text{HO}_3\text{SCF}_3$   $4.6 \cdot 10^{-2}$  M in  $\text{CH}_3\text{CN}$  were added. The  $\text{CH}_3\text{CN}$  was removed under reduced pressure and replaced with 10 mL of  $\text{MeOH}$ . The yellow solid insoluble in  $\text{MeOH}$  was separated from the red solution by filtration and washed with 2 x 3 mL of cold  $\text{MeOH}$  and 2 mL of  $\text{Et}_2\text{O}$ . The powder was dissolved in  $\text{ACN}$  and recrystallized by vapor diffusion of  $\text{Et}_2\text{O}$  into the solution. 24 mg (0.024 mmol, 13% yield) of yellow block shaped crystals of  $[\text{Cr}(\text{Me}_2\text{biim})_3](\text{CF}_3\text{SO}_3)_3$  were collected.

Method 2:

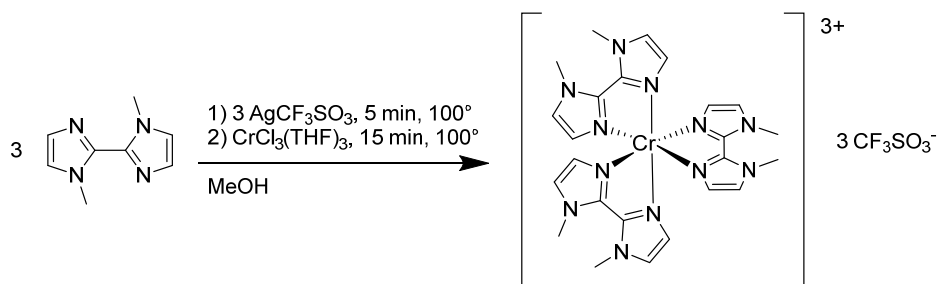

In a sealed microwave vial, 102 mg (0.629 mmol, 3.36 equivalents) of  $\text{Me}_2\text{biim}$  and 0.155 mg (0.603 mmol, 3.22 equivalents) of  $\text{AgCF}_3\text{SO}_3$  were added in 10 mL of  $\text{MeOH}$ . The vial was heated 5 min at  $100^\circ\text{C}$  with the microwave, the solution was clear. 70 mg (0.187 mmol, 1 equivalent) of anhydrous  $\text{CrCl}_3 \cdot 3\text{THF}$  were added and the vial was heated 15 min at  $100^\circ\text{C}$  with the microwave. The white precipitated  $\text{AgCl}$  was filtered and discarded. The dark orange solution was evaporated to 3 mL under reduced pressure and put in the freezer ( $-18^\circ\text{C}$ ) for 1h. The yellow precipitate was separated from the brown solution by filtration and washed with 2 x 3 mL of cold  $\text{MeOH}$  and 2 mL of  $\text{Et}_2\text{O}$ . The powder was dissolved in  $\text{CH}_3\text{CN}$  and recrystallized by vapor diffusion of  $\text{Et}_2\text{O}$  into the solution. 33



mg (0.0335 mmol, 18% yield) yellow block shaped crystals of  $[\text{Cr}(\text{Me}_2\text{biim})_3](\text{CF}_3\text{SO}_3)_3$  were collected.

Method 3 (2 steps):

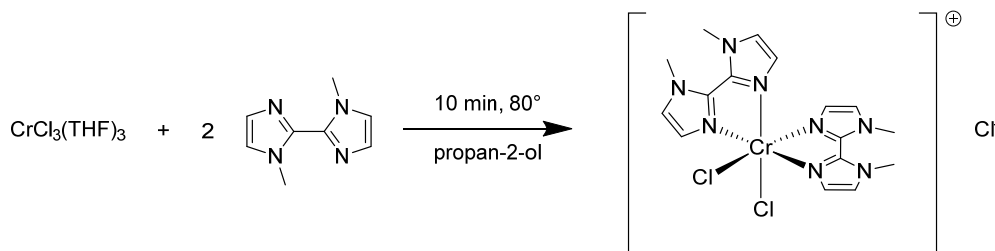

In a sealed microwave vial, 202 mg (1.25 mmol) of  $\text{Me}_2\text{biim}$  and 220 mg (0.559 mmol, 3.00 equivalents) of  $\text{CrCl}_3 \cdot 3\text{THF}$  were added in 5 mL of isopropanol. The vial was then heated 10 min at  $80^\circ\text{C}$  in the microwave oven. The green powder was filtered, washed with 10 mL of isopropanol, 10 mL  $\text{CH}_2\text{Cl}_2$  and 10 mL of  $\text{Et}_2\text{O}$ . 226 mg (0.468 mmol, 80% yield) of green powder of  $[\text{Cr}(\text{Me}_2\text{biim})_2\text{Cl}_2]\text{Cl}$  were obtained.

Elemental analysis: calculated for  $[\text{Cr}(\text{Me}_2\text{biim})_2\text{Cl}_2]\text{Cl} \cdot 0.95\text{H}_2\text{O}$ : C 38.45, H 4.42, N 22.42; found: C 38.10, H 4.08, N 22.26.

ESI-LRMS ( $m/z$ ); calculated for  $\text{C}_{16}\text{H}_{20}\text{Cl}_2\text{CrN}_8^+$ : 446.058  $[\text{Cr}(\text{Me}_2\text{biim})_2\text{Cl}_2]^+$ , found 446.3.

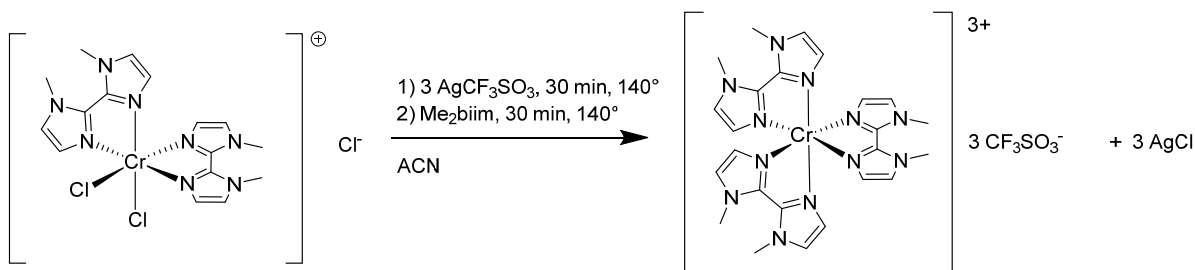

In a sealed microwave vial, 100 mg (0.207 mmol) of  $[\text{Cr}(\text{Me}_2\text{biim})_2\text{Cl}_2]\text{Cl}$ , 159 mg (0.619 mmol) of  $\text{AgCF}_3\text{SO}_3$  and 2 mL of ACN were added. The vial was heated 30 min at  $140^\circ\text{C}$  in the microwave oven. A white precipitate formed with an orange solution containing the intermediate  $[\text{Cr}(\text{Me}_2\text{biim})_2(\text{CF}_3\text{SO}_3)_2]^+$  ( $m/z$  calc. for  $[\text{Cr}(\text{Me}_2\text{biim})_2(\text{CF}_3\text{SO}_3)_2]^+$  674.025; found: 674.0).

The solution was separated from the precipitate by filtration and transferred into another vial containing 40 mg (0.25 mmol, 1.2 equivalents) of  $\text{Me}_2\text{biim}$ . The vial was heated 30 min at  $110^\circ\text{C}$  in the microwave oven. The orange solution was evaporated under reduced pressure, and dissolved in a minimum of  $\text{MeOH}$  (5 mL). The insoluble yellow solid was separated from the solution by filtration. The yellow powder was dissolved in a minimum of  $\text{CH}_3\text{CN}$  (5 mL) and recrystallized by vapor diffusion of  $\text{Et}_2\text{O}$  into the solution. After filtration, 82 mg (0.0832 mmol, 40% yield) of yellow crystals were obtained.

Elemental analysis: calculated for  $[\text{Cr}(\text{Me}_2\text{biim})_3](\text{CF}_3\text{SO}_3)_3$ : C 32.90, H 3.07, N 17.05; found: C 32.64, H 3.12, N 16.99.

ESI-MS ( $m/z$ ): calculated for  $\text{C}_{26}\text{H}_{30}\text{CrF}_6\text{N}_{12}\text{O}_6\text{S}_2^+$ : 836.1157  $[\text{Cr}(\text{Me}_2\text{biim})_3(\text{CF}_3\text{SO}_3)_2]^+$ , found: 836.115; calculated for  $\text{C}_{25}\text{H}_{30}\text{CrF}_3\text{N}_{12}\text{O}_3\text{S}^{2+}$ : 343.5816  $[\text{Cr}(\text{Me}_2\text{biim})_3(\text{CF}_3\text{SO}_3)]^{2+}$ , found: 343.580; calculated for  $\text{C}_{24}\text{H}_{30}\text{CrN}_{12}^{3+}$ : 179.4035  $[\text{Cr}(\text{Me}_2\text{biim})_3]^{3+}$ , found: 179.403.

**Synthesis of  $[\text{Cr}(\text{phen})_2\text{Cl}_2]\text{Cl}$  according to literature procedure with modifications.<sup>A1-10</sup>**

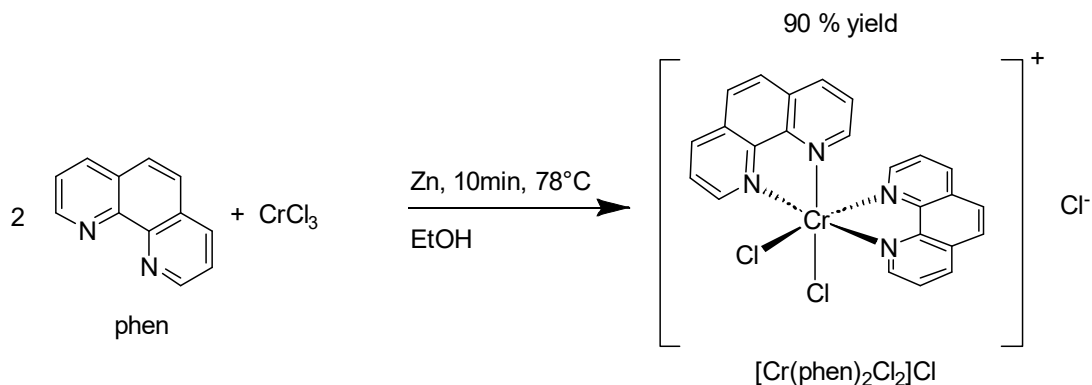

Anhydrous  $\text{CrCl}_3$  (1.00 g, 6.32 mmol), 1,10-phenanthroline (3.00 g, 16.6 mmol) and metallic zinc pellets (2.2 g) were introduced in a 100 mL flask. To the mixture, 20 mL of EtOH were added and the mixture was heated 10 min at reflux. Formation of green crystals was observed during cooling of the flask to room temperature. The crystals were separated from the brown solution by filtration, washed with 30 mL of EtOH, and the Zn pellets were removed with tweezers (2.94 g, 5.67 mmol, 90% yield).

Elemental analysis: calculated for  $[\text{Cr}(\text{phen})_2\text{Cl}_2]\text{Cl} \cdot 1.55\text{H}_2\text{O}$ : C 52.73, H 3.52, N 10.25; found: C 52.68, H 3.39, N 10.13.

ESI-LRMS ( $m/z$ ): calculated for  $[\text{Cr}(\text{phen})_2\text{Cl}_2]^+$  ( $\text{C}_{24}\text{H}_{16}\text{Cl}_2\text{CrN}_4^+$ ): 482.0152, found: 482.4.

**Synthesis of  $[\text{Cr}(\text{phen})_2(\text{H}_2\text{biim})](\text{CF}_3\text{SO}_3)_3$ .**

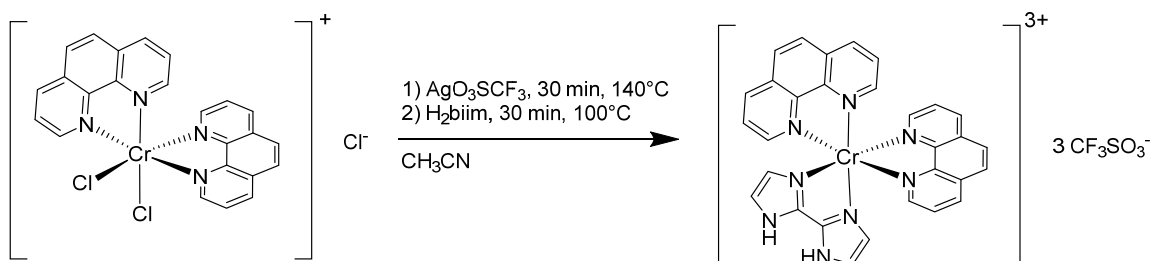

500 mg (0.964 mmol) of  $[\text{Cr}(\text{phen})_2\text{Cl}_2]\text{Cl}$ , 2.09 g (8.13 mmol) of  $\text{AgO}_3\text{SCF}_3$  and 10 mL of  $\text{CH}_3\text{CN}$  were introduced in a sealed microwave vial. The mixture was heated 30 min at  $140^\circ\text{C}$  in the microwave oven. A white precipitate of  $\text{AgCl}$  was formed with a red solution containing intermediate  $[\text{Cr}(\text{phen})_2(\text{CF}_3\text{SO}_3)_2]^+$  ( $m/z$  calc. for  $[\text{Cr}(\text{phen})_2(\text{CF}_3\text{SO}_3)_2]^+$  709.981; found: 710).

The white precipitate was separated by filtration and discarded. The red solution and 250 mg (1.86 mmol) of H<sub>2</sub>biim were introduced into a microwave vial, and the mixture was heated 30 min at 100 °C in the microwave oven. The dark orange solution was evaporated to dryness under reduced pressure and resolubilized in 10 mL of MeOH. The solution was filtered to remove some insoluble grey precipitate then precipitated in Et<sub>2</sub>O and filtered. The orange powder was redissolved in 10 mL of a solution of HO<sub>3</sub>SCF<sub>3</sub> 10<sup>-2</sup> mol/L in MeOH, a small quantity of precipitate did not dissolve and was filtered off. The yellow solution was recrystallized by vapor diffusion of Et<sub>2</sub>O into the solution overnight. 372 mg of orange crystals were isolated by filtration (0.374 mmol, 37% yield).

Elemental analysis: calculated for [Cr(phen)<sub>2</sub>(H<sub>2</sub>biim)](CF<sub>3</sub>SO<sub>3</sub>)<sub>3</sub>: C 39.89, H 2.23, N 11.28; found: C 39.71, H 2.26, N 11.29.

ESI-MS (*m/z*): calculated for [Cr(phen)<sub>2</sub>(Hbiim)]<sup>2+</sup> (C<sub>30</sub>H<sub>21</sub>CrN<sub>8</sub><sup>2+</sup>): 272.5641, found: 272.566; calculated for [Cr(phen)<sub>2</sub>(Hbiim)](CF<sub>3</sub>SO<sub>3</sub>)<sup>+</sup> (C<sub>31</sub>H<sub>21</sub>CrF<sub>3</sub>N<sub>8</sub>O<sub>3</sub>S<sup>+</sup>): 694.0810, found: 694.082.

### Synthesis of [Cr(phen)<sub>2</sub>(Hbiim)](CF<sub>3</sub>SO<sub>3</sub>)<sub>2</sub>.

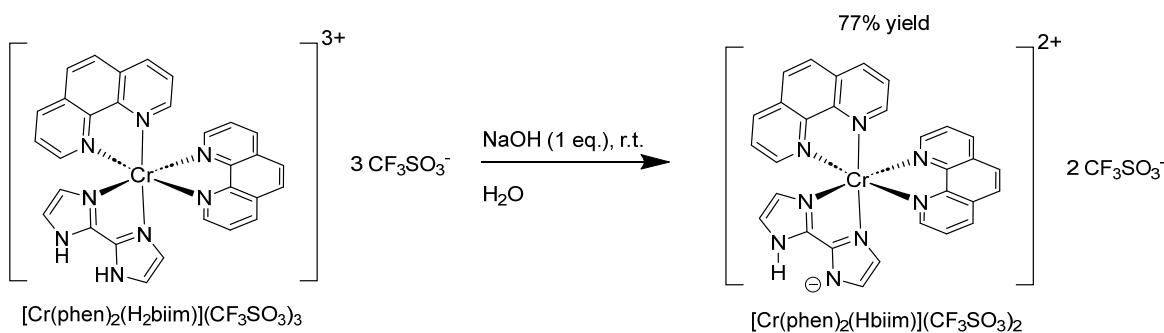

In a beaker, 200 mg (0.201 mmol) of [Cr(phen)<sub>2</sub>(H<sub>2</sub>biim)](CF<sub>3</sub>SO<sub>3</sub>)<sub>3</sub> were dissolved in 5 mL of H<sub>2</sub>O. 200 μL of aqueous NaOH 1M (0.200 mmol) were added to the orange solution. The color of the solution immediately turned red and red crystals started to form. The beaker was put in the fridge (4°C) overnight. The red crystals were collected by filtration, washed with 2 x 2 mL of cold H<sub>2</sub>O then dried in vacuum yielding 130 mg (0.154 mmol, 77% yield) of a red crystalline powder.

Elemental analysis: calculated for [Cr(phen)<sub>2</sub>(Hbiim)](CF<sub>3</sub>SO<sub>3</sub>)<sub>2</sub>: C 45.56, H 2.51, N 13.28; found: C 45.29, H 2.42, N 13.23.

ESI-MS (*m/z*): calculated for [Cr(phen)<sub>2</sub>(Hbiim)]<sup>2+</sup> (C<sub>30</sub>H<sub>21</sub>CrN<sub>8</sub><sup>2+</sup>): 272.5641, found: 272.566; calculated for [Cr(phen)<sub>2</sub>(Hbiim)](CF<sub>3</sub>SO<sub>3</sub>)<sup>+</sup> (C<sub>31</sub>H<sub>21</sub>CrF<sub>3</sub>N<sub>8</sub>O<sub>3</sub>S<sup>+</sup>): 694.0810, found: 694.082.

### Synthesis of $[\text{Cr}(\text{phen})_2(\text{biim})]\text{CF}_3\text{SO}_3$ .

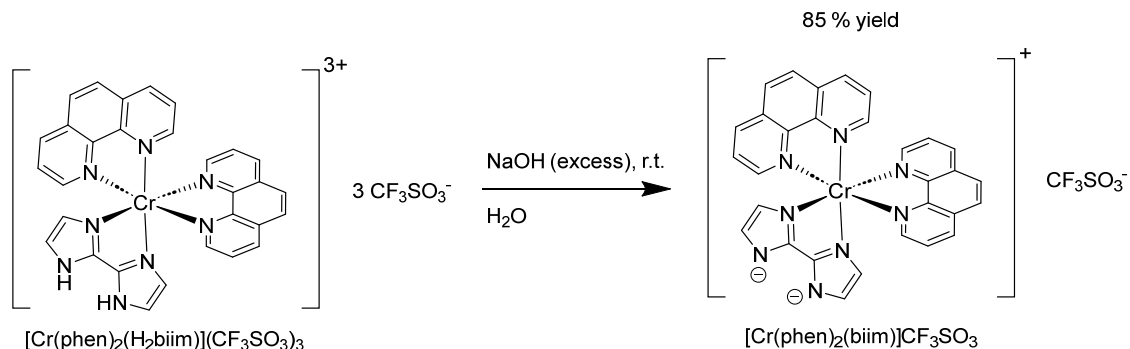

In a beaker, 200 mg (0.201 mmol) of  $[\text{Cr}(\text{phen})_2(\text{H}_2\text{biim})](\text{CF}_3\text{SO}_3)_3$  were dissolved in 5 mL of  $\text{H}_2\text{O}$ . 1.50 mL of aqueous NaOH 1M (1.50 mmol) were added to the orange solution. The color of the solution immediately turned dark brown and black crystals started to form. The beaker was put in the fridge ( $4^\circ\text{C}$ ) overnight. The black crystals were collected by filtration, washed with 2 x 2 mL of cold  $\text{H}_2\text{O}$  then dried in vacuum yielding 118 mg (0.170 mmol, 85% yield) of black crystalline powder.

Elemental analysis: calculated for  $[\text{Cr}(\text{phen})_2(\text{biim})]\text{CF}_3\text{SO}_3 + 0.55 \text{H}_2\text{O}$ : C 52.93, H 3.02, N 15.93; found: C 53.07, H 3.21, N 16.05.

ESI-MS ( $m/z$ ): calculated for  $[\text{Cr}(\text{phen})_2(\text{Hbiim})]^{2+}$  ( $\text{C}_{30}\text{H}_{21}\text{CrN}_8^{2+}$ ): 272.5641, found: 272.566; calculated for  $[\text{Cr}(\text{phen})_2(\text{Hbiim})](\text{CF}_3\text{SO}_3)^+$  ( $\text{C}_{31}\text{H}_{21}\text{CrF}_3\text{N}_8\text{O}_3\text{S}^+$ ): 694.0810, found: 694.082.

### References

- A1-1 W. L. F. Armarego, C. L. L. Chai, *Purification of Laboratory Chemicals*, Elsevier, 2009.
- A1-2 G. M. Sheldrick, *Acta Cryst. A*, 2008, **64**, 112-122.
- A1-3 M. C. Burla, M. Camalli, B. Carrozzini, G. L. Casciarano, C. Giacovazzo, G. Polidori and R. Spagna, *Acta Cryst. A*, 1999, **55**, 991-999.
- A1-4 G. M. Sheldrick, *Acta Cryst. C*, 2015, **71**, 3-8.
- A1-5 M. N. Feng, G. Y. Zhao, H. L. Gao and S. J. Zhang, *Aust. J. Chem.*, 2015, **68**, 1513-1517.
- A1-6 H. M. Zhang, X. G. Yan, J. Zhao, X. L. Yang, Z. Huang, G. J. Zhou and Y. Wu, *RSC Adv.*, 2015, **5**, 88758-88766.
- A1-7 L. M. Gruia, F. D. Rochon and A. L. Beauchamp, *Can. J. Chem.*, 2006, **84**, 949-959.
- A1-8 M. J. Silvero, W. J. Peláez, P. F. Garcia and G. A. Argüello, *RSC Adv.*, 2014, **4**, 15507-15510.
- A1-9 M. Cantuel, G. Bernardinelli, D. Imbert, J.-C. G. Bünzli, G. Hopfgartner and C. Piguet, *J. Chem. Soc., Dalton Trans.*, 2002, 1929-1940.
- A1-10 B. Doistau, G. Collet, E. Acuna Bolomey, V. Sadat-Noorbakhsh, C. Besnard and C. Piguet, *Inorg. Chem.*, 2018, **57**, 14362-14373.

## Appendix 2 Crystal structures of homoleptic chromium complexes with 2,2'biimidazole.

### Crystal structure of $[\text{Cr}(\text{H}_2\text{biim})_3](\text{NO}_3)_3$ **1** (Tables S2-S3).

Single crystal of  $[\text{Cr}(\text{H}_2\text{biim})_3](\text{NO}_3)_3$  suitable for X-ray diffraction were obtained by vapor diffusion of Et<sub>2</sub>O into a methanolic solution of the complex.

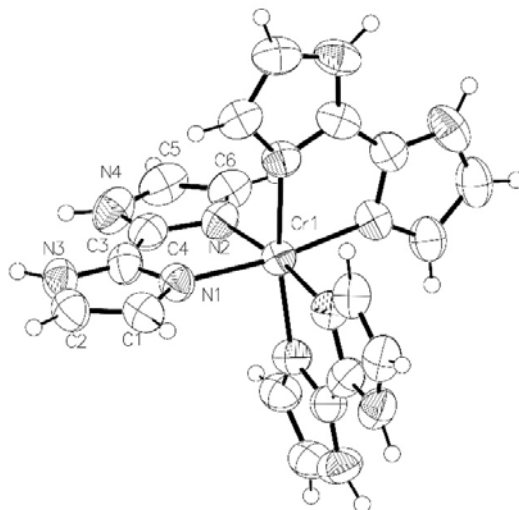

**Figure A2-1** ORTEP view of the complex  $[\text{Cr}(\text{H}_2\text{biim})_3]^{3+}$  in the crystal structure of  $[\text{Cr}(\text{H}_2\text{biim})_3](\text{NO}_3)_3$ .

The complex crystallizes in the trigonal space group R3c, which differs only slightly from the previously reported structure of the same complex in the R-3c space group.<sup>A2-1</sup> (Our data were also consistent with a model in the space group R-3c, at the expense of larger ellipsoids, especially for O2 and the position corresponding to N3/N4. The model in R3c was then preferred.) The Cr atom is surrounded by 6 N atoms in the first coordination sphere, which are arranged in a pseudo octahedral geometry. The distortion from ideal octahedral geometry will be discussed later. The unit cell does not contain any solvent molecule. The most noticeable feature is the presence of a hydrogen bonds network between the NO<sub>3</sub><sup>-</sup> anions and the hydrogens located on the nitrogen atoms of the ligand (Figure A2-2A2-2).

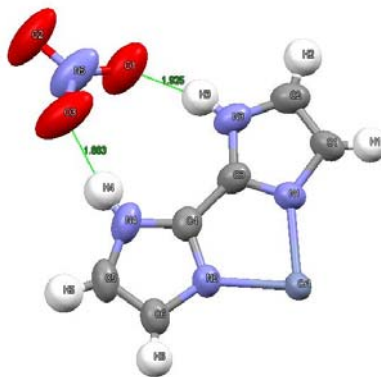

**Figure A2-2** View of the asymmetric unit in the crystal structure of  $[\text{Cr}(\text{H}_2\text{biim})_3](\text{NO}_3)_3$ .

The  $\text{O}\cdots\text{H}$  distance between the  $\text{NO}_3^-$  and the imidazole is 1.9 Å and the N-O distance is 2.75 Å in the  $\text{N-H}\cdots\text{O}$  hydrogen bond. This is a good indication of the acidic nature of the biimidazole-NH groups when the ligand is coordinated to the  $\text{Cr}^{3+}$  ion.

#### **Crystal structure of $[\text{Cr}(\text{Hbiim})_3]$ 2 (Tables S4-S6).**

The neutral complex  $[\text{Cr}(\text{Hbiim})_3]$  is highly insoluble in common organic solvents. Therefore, it was difficult to recrystallize this compound. To overcome this problem, we decided to form crystals by vapor diffusion of triethylamine into a methanolic solution of  $[\text{Cr}(\text{H}_2\text{biim})_3](\text{NO}_3)_3$ . The triethylamine could deprotonate slowly enough  $[\text{Cr}(\text{H}_2\text{biim})_3]^{3+}$  to form crystals of  $[\text{Cr}(\text{Hbiim})_3]$  instead of a precipitate. Crystals suitable for X-ray diffraction were obtained (Figure A2-3). Unfortunately, the solvents molecules present in the large cavities between the complexes are highly disordered, so the global structure refinement was really difficult to perform. The only option was to perform a SQUEEZE bypass procedure as implemented in Olex2 software,<sup>A2-2</sup> which basically consists in removing the electron density created by the solvents molecules, but making the structure not fully reliable for detailed structure analysis. A solvent mask was calculated, and 1103 electrons were found in a volume of  $3805\text{Å}^3$  in one void per unit cell. This is consistent with the presence of  $10[\text{CH}_3\text{OH}]$  per formula unit which account for 1080 electrons per unit cell.

This problem persisted even after several attempts to crystallize the complex in different crystallization conditions. Gruia et al<sup>A2-1</sup> encountered the same problem when they tried to resolve the structure of  $[\text{Cr}(\text{Hbiim})_3](\text{C}_6\text{H}_{14}\text{O})_{2.6}$ . The only reliable structure available was  $[\text{Cr}(\text{Hbiim})_3](\text{C}_6\text{H}_6)(\text{H}_2\text{O})_2$  that they unexpectedly obtained in condition difficult to replicate.<sup>A2-1</sup> This structure was used for calculation of the octahedral distortion which is detailed later.

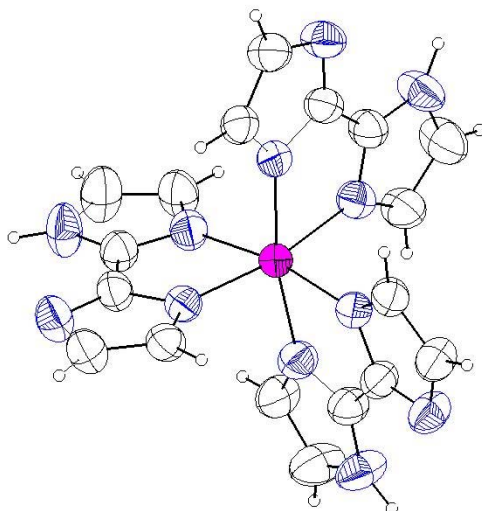

**Figure A2-3** ORTEP view of the complex  $[\text{Cr}(\text{Hbiim})_3]$ .

The packing of the complexes is mainly driven by hydrogen bonds interactions. In this case, the half-deprotonated biimidazole is a hydrogen bond donor and acceptor at the same time allowing a complementary interaction with another half-deprotonated biimidazole of a neighboring complex (Figure A2-4). Each complex form 3 pairs of hydrogen bonds (one pair for each ligand) with 3 neighboring complexes. Again, the  $\text{N}\cdots\text{H}$  and the  $\text{N}\cdots\text{H}\cdots\text{N}$  distance are relatively short (1.89 Å and 2.76 Å respectively, Table S5) showing strong interactions. A consequence of the hydrogen bonding network is the very low solubility of the complex in common solvents.

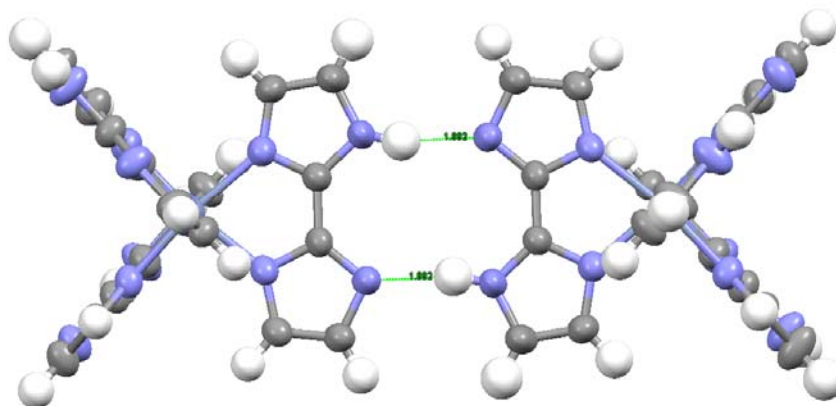

**Figure A2-4** View of the hydrogens bonds interactions between two neighboring complexes in the crystal structure of  $[\text{Cr}(\text{Hbiim})_3]$ .

**Crystal structure of [Cr(Hbiim)<sub>2</sub>(biim)]PPh<sub>4</sub>(MeOH) 3** (Tables S7-S9).

The crystal structure of [Cr(Hbiim)<sub>2</sub>(biim)]PPh<sub>4</sub>(MeOH) was recorded with single crystals obtained by vapor diffusion of <sup>t</sup>BuOMe into a methanolic solution of the complex. The complex crystallizes in the *P2<sub>1</sub>/c* space group with one MeOH molecule in the asymmetric unit (Figure A2-5).

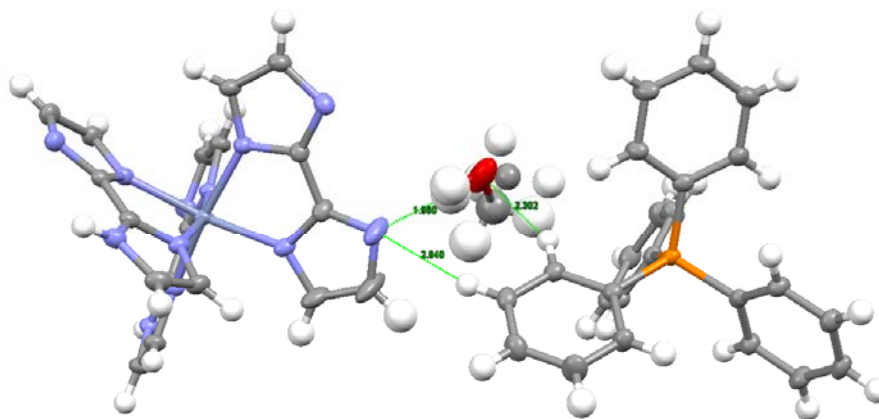

**Figure A2-5** View of the asymmetric unit in the crystal structure of [Cr(Hbiim)<sub>2</sub>(biim)]PPh<sub>4</sub>(MeOH) where the hydrogens bonds are highlighted.

The MeOH molecule forms a hydrogen bond with one of the nitrogen of the biim<sup>2-</sup> ligand ( $d_{\text{N}\cdots\text{H}} = 1.96 \text{ \AA}$ ;  $d_{\text{N}\cdots\text{H}\cdots\text{O}} = 2.78 \text{ \AA}$ , Table S8). Similarly to complex [Cr(Hbiim)<sub>3</sub>], one of the Hbiim<sup>-</sup> ligand in [Cr(Hbiim)<sub>2</sub>(biim)]<sup>-</sup> forms the same type of complementary hydrogen bonds with a Hbiim<sup>-</sup> of an adjacent complex (Figure A2-6a). The second Hbiim<sup>-</sup> ligand forms another type of complementary interaction with one of the imidazolate of the biim<sup>2-</sup> ligand of an adjacent complex (Figure A2-6b). As it can be seen on Figure A2-6b, the N-H of the Hbiim<sup>-</sup> forms a hydrogen bond with the N<sup>-</sup> of the imidazolate ( $d_{\text{N}\cdots\text{H}} = 1.89 \text{ \AA}$ ), while the N<sup>-</sup> of the Hbiim<sup>-</sup> interacts weakly with the aromatic C-H of the same imidazolate ring of biim<sup>2-</sup> ( $d_{\text{N}\cdots\text{H}} = 2.57 \text{ \AA}$ ).



a)

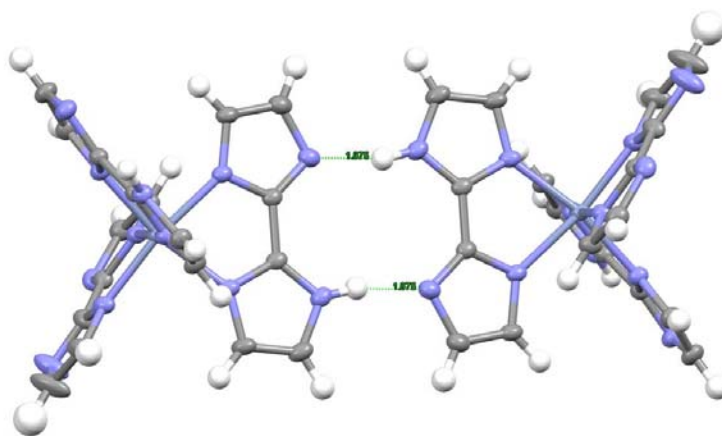

b)

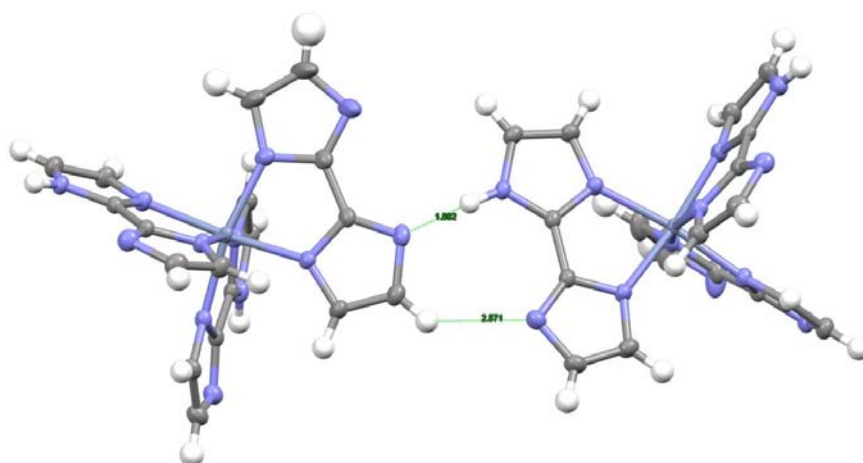

**Figure A2-6** a) View of the hydrogen bonds formed between two Hbiim<sup>-</sup> ligands of adjacent complexes in the crystal structure of [Cr(Hbiim)<sub>2</sub>(biim)]PPh<sub>4</sub>(MeOH). b) View of the hydrogen bonds formed between one Hbiim<sup>-</sup> ligand and one biim<sup>2-</sup> of an adjacent complex in the crystal structure of [Cr(Hbiim)<sub>2</sub>(biim)]PPh<sub>4</sub>(MeOH).

Surprisingly, when the crystalline powder of [Cr(Hbiim)<sub>2</sub>(biim)]PPh<sub>4</sub>(MeOH) is separated from the solvent mixture and dried, single crystals suitable for X-ray diffraction could be extracted from the powder. The structure of these crystals is essentially the same as the previous one but without the MeOH molecule to give [Cr(Hbiim)<sub>2</sub>(biim)]PPh<sub>4</sub> **4** (Figure A2-7, Tables S10-S12). The X-ray diffraction powder pattern indicates that the dried powder only contains crystals without MeOH.

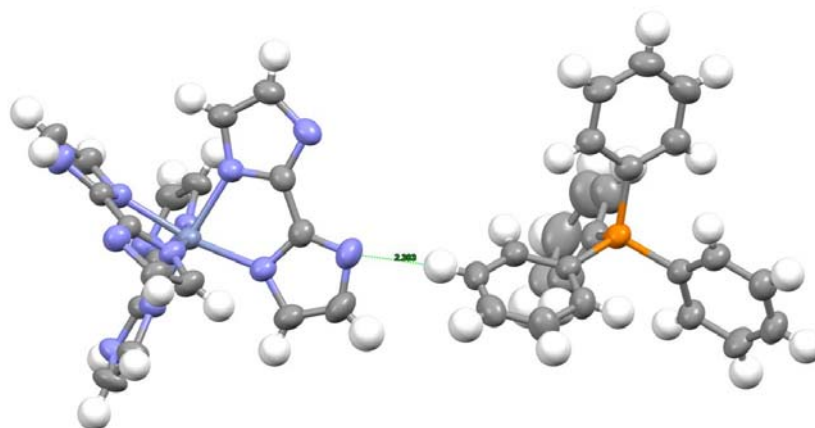

**Figure A2-7** View of the asymmetric unit in the crystal structure of dry  $[\text{Cr}(\text{Hbiim})_2(\text{biim})]\text{PPh}_4$  where the hydrogen bond between the  $\text{biim}^{2-}$  and the  $\text{PPh}_4^+$  cation is highlighted.

**Crystal structure of *cis*- $[\text{Cr}(\text{Me}_2\text{biim})_2\text{Cl}_2]\text{Cl}$  5** (Tables S13-S15).

The structure of the intermediate *cis*- $[\text{Cr}(\text{Me}_2\text{biim})_2\text{Cl}_2]\text{Cl}$  that was isolated as an intermediate product along the synthesis of  $[\text{Cr}(\text{Me}_2\text{biim})_3](\text{CF}_3\text{SO}_3)_3$  (Figure 2) could also be resolved by X-ray diffraction. Single crystals were obtained by slow evaporation of a concentrated methanolic solution of  $[\text{Cr}(\text{Me}_2\text{biim})_2\text{Cl}_2]\text{Cl}$ .

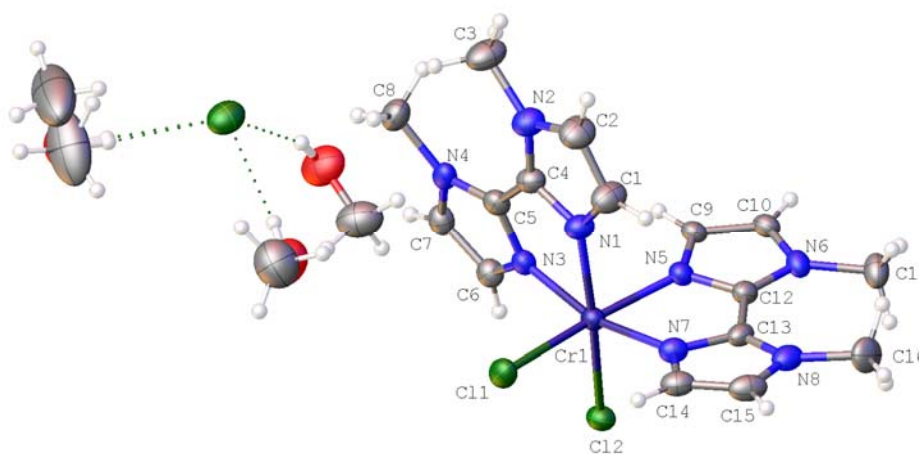

**Figure A2-8** ORTEP view of the full asymmetric unit of *cis*- $[\text{Cr}(\text{Me}_2\text{biim})_2\text{Cl}_2]\text{Cl}(\text{MeOH})_3$ .

In this complex, two  $\text{Me}_2\text{biim}$  ligands and two  $\text{Cl}^-$  are coordinated to the chromium ion, while a third  $\text{Cl}^-$  lies outside the first coordination sphere and is surrounded by 3 molecules of  $\text{MeOH}$  (Figure A2-8). The complex adopts the *cis*-configuration.

**Crystal structure of  $[\text{Cr}(\text{Me}_2\text{biim})_3](\text{CF}_3\text{SO}_3)_3$  6** (Tables S16-S17).

For the complex  $[\text{Cr}(\text{Me}_2\text{biim})_3](\text{CF}_3\text{SO}_3)_3$ , single crystals suitable for X-ray diffraction could be obtained by slow evaporation of a methanolic solution of the complex.

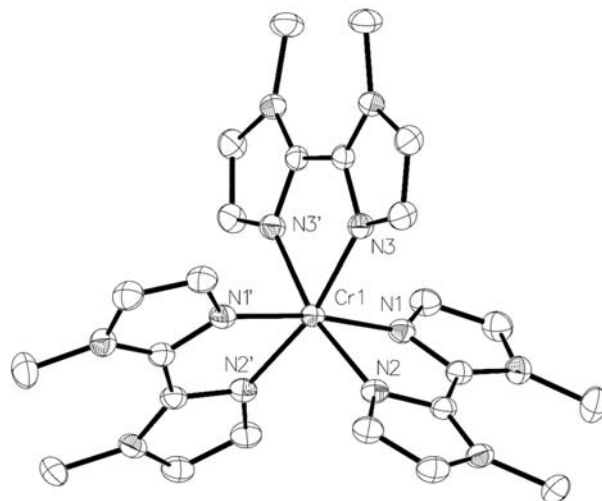

**Figure A2-9** ORTEP view of the complex  $[\text{Cr}(\text{Me}_2\text{biim})_3]^{3+}$  in the crystal structure of  $[\text{Cr}(\text{Me}_2\text{biim})_3](\text{CF}_3\text{SO}_3)_3$ . Hydrogen atoms and  $\text{CF}_3\text{SO}_3^-$  are omitted for clarity.

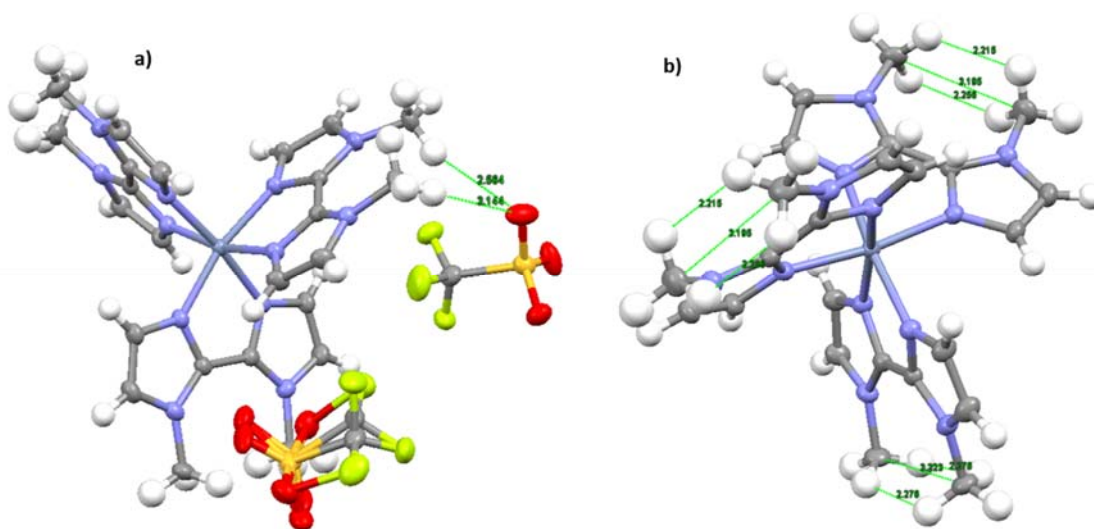

**Figure A2-10** a) View of the intermolecular interactions between the triflates and the hydrogens of the methyls. b) View of the intramolecular steric interactions between the methyl groups of  $\text{Me}_2\text{biim}$ . No molecule of solvent is present in the crystal structure, the triflate anions weakly interact with the hydrogens of the methyl groups of the ligands (Figure A2-10a). Some steric interactions are observed between the adjacent methyl groups of each ligand that are in close proximity ( $d_{\text{H}\cdots\text{H}} = 2.2\text{-}2.3 \text{ \AA}$ ;  $d_{\text{C}\cdots\text{C}} = 3.2 \text{ \AA}$ ) and adopt a conformation that minimize distance between the hydrogen atoms (Figure A2-10b).

### Structural analysis

For all the structures presented above, the two imidazole rings in the didentate ligands ( $\text{H}_2\text{biim}$ ,  $\text{Hbiim}^-$ ,  $\text{biim}^{2-}$  and  $\text{Me}_2\text{biim}$ ), are almost coplanar, with no or little rotation around the  $\text{C}_2\text{-C}_2'$  axis

(N<sub>1</sub>-C<sub>2</sub>-C<sub>2</sub>'-N<sub>1</sub>' dihedral angles < 7.0°). The central Cr<sup>3+</sup> ion is surrounded by 6 atoms in the first coordination sphere, with a pseudo-octahedral geometry. The amount of deviation from a perfect octahedral geometry was quantified in three different ways. The first way consists to look at the N-Cr-N' cisoids angles, in a perfect octahedral geometry, the 6 nitrogen atoms around the Cr<sup>3+</sup> ion would form 12 N-Cr-N' cisoid angles  $\phi_i$  exactly 90° each. When the geometry deviates from pure octahedral, the cisoid angles deviates from 90°, and this deviation can be measured with the parameter  $\Sigma$ <sup>A2-3</sup> using the following equation A2-1:

$$\Sigma = \sum_{i=1}^{12} |\phi_i - 90| \quad (\text{A2-1})$$

In the case of a metal surrounded by 3 didentate ligands, it is possible to calculate the parameter  $\Theta$  using equation A2-2.

$$\Theta = \sum_{i=1}^6 |\theta_i - 60| \quad (\text{A2-2})$$

The definition of the angles  $\theta_i$  is described in Figure A2-11. This parameter is a good measure of the trigonal distortion in the case of a complex of a metal surrounded by three didentate ligands. If the geometry of the first coordination sphere is perfectly octahedral, then  $\Theta = 0^\circ$  but if the geometry is distorted,  $\Theta > 0^\circ$ .

The last parameter analyzed is the continuous shape measure<sup>A2-4,A2-5</sup> (abbreviated as CShM) of the first coordination sphere using the software SHAPE.<sup>A2-6</sup> CShM is defined as its distance to an ideal shape, independent of size and orientation. In this case, the CShM was compared to the octahedron. For the first coordination sphere of the complexes that can be approximately described by an octahedron, the coordinates of the 6 atoms are given by their position vectors  $\vec{Q}_k$  ( $k = 1, 2, \dots, 6$ ), whereas the coordinates for the perfect octahedron closest in size and orientation is given by the vectors  $\vec{P}_k$  ( $k = 1, 2, \dots, 6$ ). The distance  $S_Q(P)$  of the molecular structure  $Q$  to the perfect polyhedron  $P$  is then defined as

$$S_Q(P) = \min \frac{\sum_{k=1}^N |\vec{Q}_k - \vec{P}_k|^2}{\sum_{k=1}^N |\vec{Q}_k - \vec{Q}_0|^2} \times 100 \quad (\text{A2-3})$$

where  $\vec{Q}_0$  is the coordinate vector of the geometrical center of the investigated structure. With this equation, we obtain  $0 < S_Q(P) < 100$ . The closer  $S_Q(P)$  is to 0, the closer to a perfect octahedron is the analyzed structure; whereas is the coordination sphere is more distorted,  $S_Q(P)$  increases.

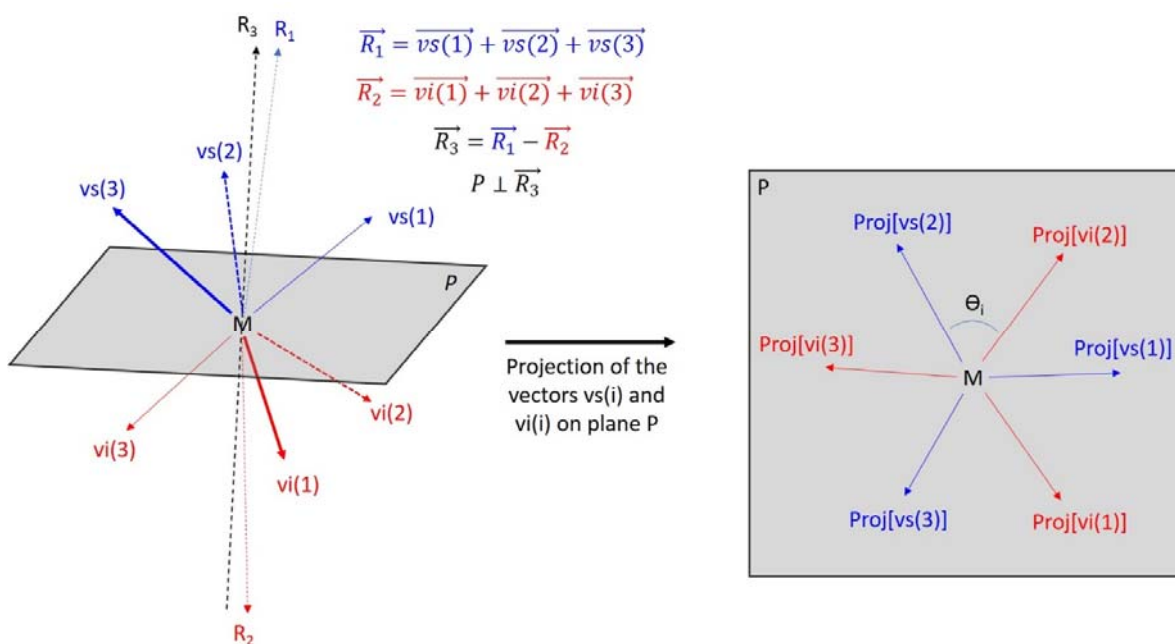

**Figure A2-11** Geometrical representation of the angles  $\theta_i$  used to calculate  $\Theta$  in the case of a complex  $[M(L_i)_3]^{n+}$ . Here,  $vs(i)$  and  $vi(i)$  corresponds to the position vector relative to M of the two coordinating atoms of each didentate ligand  $L_i$ . Two vectors  $R_1$  and  $R_2$  are defined as the sum of  $vs(i)$  and  $vi(i)$  respectively. A plane P is defined as the plane containing M and perpendicular to the vector  $R_3 = R_1 - R_2$  (left part of the figure). Each vector  $vs(i)$  and  $vi(i)$  is projected on this plane, and 6 angles  $\theta_i$  are defined as the angles between each pair of adjacent projected vectors  $Proj[vs(i)]$  or  $Proj[vi(i)]$  (right part of the figure).

**Table A2-1** Average Cr-N bond lengths, bite angles and parameters  $\Sigma$ ,  $\Theta$  and  $S_Q(P)$  for the complexes reported here and in literature.

| Complex                                                                                                | $\Sigma / ^\circ$ | $\Theta / ^\circ$ | $S_Q(P)$          | Average<br>bite angle $/^\circ$ | Average<br>$d_{\text{Cr-N}} / \text{\AA}$ | Standard deviation<br>of $d_{\text{Cr-N}} / \text{\AA}$ | Reference |
|--------------------------------------------------------------------------------------------------------|-------------------|-------------------|-------------------|---------------------------------|-------------------------------------------|---------------------------------------------------------|-----------|
| [Cr(H <sub>2</sub> biim) <sub>3</sub> ](NO <sub>3</sub> ) <sub>3</sub>                                 | 59.2              | 59.8              | 0.748             | 80.4                            | 2.028                                     | 0.004                                                   | This work |
| [Cr(Hbiim) <sub>3</sub> ](C <sub>6</sub> H <sub>6</sub> )(H <sub>2</sub> O) <sub>2</sub>               | 66.2              | 92.6              | 1.278             | 79.7                            | 2.039                                     | 0.001                                                   | A2-1      |
| [Cr(Hbiim) <sub>2</sub> (biim)]PPh <sub>4</sub>                                                        | 66.6              | 84.8              | 1.184             | 79.7                            | 2.034                                     | 0.019                                                   | This work |
| [Cr(Hbiim) <sub>2</sub> (biim)]PPh <sub>4</sub> (MeOH)                                                 | 66.2              | 87.0              | 1.213             | 79.6                            | 2.037                                     | 0.021                                                   | This work |
| [Cr(Me <sub>2</sub> biim) <sub>3</sub> ](CF <sub>3</sub> SO <sub>3</sub> ) <sub>3</sub>                | 72.4              | 80.4              | 1.195             | 78.4                            | 2.025                                     | 0.005                                                   | This work |
| <i>cis</i> -[Cr(Me <sub>2</sub> biim) <sub>2</sub> Cl <sub>2</sub> ]Cl(MeOH) <sub>3</sub> <sup>a</sup> | 51.6              | -                 | 1.289             | 78.0                            | 2.040                                     | 0.012                                                   | This work |
| [Cr(phen) <sub>2</sub> (H <sub>2</sub> biim)](CF <sub>3</sub> SO <sub>3</sub> ) <sub>3</sub>           | 56.5              | 53.6              | 0.713             | 80.9                            | 2.044                                     | 0.016                                                   | This work |
| [Cr(phen) <sub>2</sub> (Hbiim)](CF <sub>3</sub> SO <sub>3</sub> ) <sub>2</sub>                         | 57.3              | 52.1              | 0.685             | 80.7                            | 2.047                                     | 0.023                                                   | This work |
| [Cr(phen) <sub>2</sub> (biim)](CF <sub>3</sub> SO <sub>3</sub> )                                       | 58.5              | 62.2              | 0.804             | 80.6                            | 2.046                                     | 0.039                                                   | This work |
| [Cr(bpy) <sub>3</sub> ](PF <sub>6</sub> ) <sub>3</sub>                                                 | 67.4              | 63.6              | 0.929             | 79.1                            | 2.042                                     | 0                                                       | A2-7      |
| [Cr(phen) <sub>3</sub> ](PF <sub>6</sub> ) <sub>3</sub> <sup>b</sup>                                   | 57.9 <sup>b</sup> | 47.5 <sup>b</sup> | 0.65 <sup>b</sup> | 81.0                            | 2.051                                     | 0.008                                                   | A2-8      |

<sup>a</sup> For *cis*-[Cr(Me<sub>2</sub>biim)<sub>2</sub>Cl<sub>2</sub>]Cl(MeOH)<sub>3</sub>, the positions of the two coordinated Cl atoms were used to calculate  $\Sigma$  and  $S_Q(P)$ , but not for the bite angle or  $d_{\text{Cr-N}}$ . <sup>b</sup> Values are averaged for the two complexes Cr1A and Cr1B present in the unit cell.

We can see that for all the complexes in Table A2-1, the average bite angles are very close to  $80^\circ$  ( $78^\circ < \text{bite angle} < 81^\circ$ ). This value is typical of 5-membered chelate ring ligands,<sup>A2-9</sup> and is the main contributor to the deviation from a perfect octahedral geometry. The average Cr-N bond length is also very similar in all complexes with very little variation. When we look at the parameters  $\Sigma$ ,  $\Theta$  and  $S_Q(P)$  for the distortion from the perfect octahedral geometry, we can see that  $[\text{Cr}(\text{Me}_2\text{biim})_3]^{3+}$  is the most distorted according to  $\Sigma$ , while *cis*- $[\text{Cr}(\text{Me}_2\text{biim})_2\text{Cl}_2]\text{Cl}(\text{MeOH})_3$  has the smallest  $\Sigma$  value, this probably due to the fact that unlike the other complexes, it has only two geometrically constrained didentate ligands and two monodentate Cl. However, it has the highest value for  $S_Q(P)$  due to the longer Cr-Cl distance compared to the Cr-N distance. Otherwise,  $[\text{Cr}(\text{phen})_3]^{3+}$  and  $[\text{Cr}(\text{H}_2\text{biim})_3]^{3+}$  appear slightly less distorted than the other homoleptic complexes reported in Table A2-1.

## References

- A2-1 L. M. Gruia, F. D. Rochon and A. L. Beauchamp, *Can. J. Chem.*, 2006, **84**, 949-959.
- A2-2 A. L. Spek, *Acta Cryst. C*, 2015, **71**, 9-18.
- A2-3 R. Ketkaew, Y. Tantirungrotechai, P. Harding, G. Chastanet, P. Guionneau, M. Marchivie and D. J. Harding, *Dalton Trans.*, 2021, **50**, 1086-1096.
- A2-4 M. Pinsky and D. Avnir, *Inorg. Chem.*, 1998, **37**, 5575-5582.
- A2-5 D. Casanova, J. Cirera, M. Llunell, P. Alemany, D. Avnir and S. Alvarez, *J. Am. Chem. Soc.*, 2004, **126**, 1755-1763.
- A2-6 Stereochemical Analysis of Molecular Fragments | IQTC - The Institute of Theoretical and Computational Chemistry of the Universitat de Barcelona. <https://www.iqtc.ub.edu/uncategorised/program-for-the-stereochemical-analysis-of-molecular-fragments-by-means-of-continous-shape-measures-and-associated-tools/> (accessed 2023-03-17).
- A2-7 K. V. Goodwin, W. T. Pennington and J. D. Petersen, *Inorg. Chem.*, 1989, **28**, 2016-2018.
- A2-8 B. Doistau, G. Collet, E. Acuna Bolomey, V. Sadat-Noorbakhsh, C. Besnard and C. Piguet, *Inorg. Chem.*, 2018, **57**, 14362-14373.
- A2-9 S. Otto, M. Dorn, C. Förster, M. Bauer, M. Seitz and K. Heinze, *Coord. Chem. Rev.*, 2018, **359**, 102-111.

### Appendix 3 Crystal structures of heteroleptic chromium complexes with 2,2'biimidazole.

#### Crystal structure of $[\text{Cr}(\text{phen})_2(\text{H}_2\text{biim})](\text{CF}_3\text{SO}_3)_3(\text{H}_2\text{O})_{0.25}$ **7** (Tables S18-S20).

Single crystal of  $[\text{Cr}(\text{phen})_2(\text{H}_2\text{biim})](\text{CF}_3\text{SO}_3)_3(\text{H}_2\text{O})_{0.25}$  suitable for X-ray diffraction were obtained by vapor diffusion of  $\text{Et}_2\text{O}$  into a solution of the complex in acetonitrile.

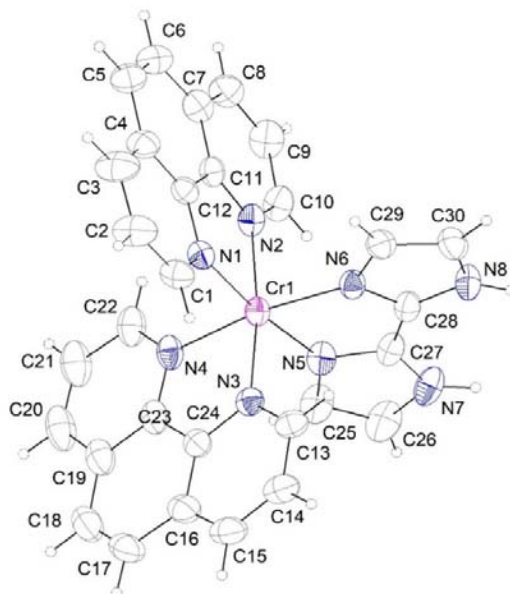

**Figure A3-1** Ortep view of  $[\text{Cr}(\text{phen})_2(\text{H}_2\text{biim})](\text{CF}_3\text{SO}_3)_3(\text{H}_2\text{O})_{0.25}$  (thermal ellipsoids are drawn at 50% probability level) with numbering scheme. Triflate counter ions and water molecules are omitted for clarity.

In this complex, Cr atom is surrounded by 6 N atoms in the first coordination sphere, which are arranged in a pseudo-octahedral geometry. The distortion from ideal octahedral geometry is discussed later. The N-H groups form hydrogen bonds with the oxygen atoms of the triflate anions (Table S19). We found a disordered water molecule in the crystal structure (site occupancy  $\sim 0.25$ ), the oxygen atom of which works as an acceptor for hydrogen bonding with a N-H unit of the complex. This is a clear indication of the acidic nature of the biimidazole-NH groups when the ligand is coordinated to the  $\text{Cr}^{3+}$  ion.

#### Crystal structure of $[\text{Cr}(\text{phen})_2(\text{Hbiim})](\text{CF}_3\text{SO}_3)_2(\text{H}_2\text{O})_{0.5}$ **8** (Tables S21-S23).

The crystal structure of  $[\text{Cr}(\text{phen})_2(\text{Hbiim})](\text{CF}_3\text{SO}_3)_2(\text{H}_2\text{O})_{0.5}$  was obtained by adding of one equivalent of NaOH into a concentrated aqueous solution of complex  $[\text{Cr}(\text{phen})_2(\text{H}_2\text{biim})](\text{CF}_3\text{SO}_3)_3$  ( $c = 10^{-2}$  mol.L $^{-1}$ ). After the addition, the solution was placed at 4 °C and single crystals of  $[\text{Cr}(\text{phen})_2(\text{Hbiim})](\text{CF}_3\text{SO}_3)_2(\text{H}_2\text{O})_{0.5}$  suitable for X-ray diffraction appeared after a few minutes.



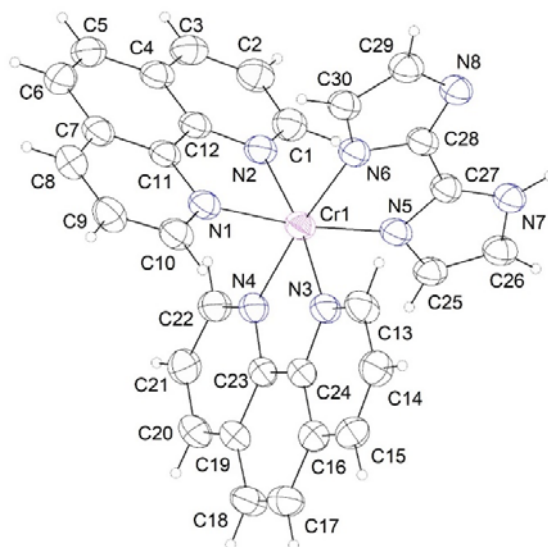

**Figure A3-2** Ortep view of  $[\text{Cr}(\text{phen})_2(\text{Hbiim})](\text{CF}_3\text{SO}_3)_2(\text{H}_2\text{O})_{0.5}$  (thermal ellipsoids are drawn at 50% probability level) with numbering scheme. Triflate counter ions and water molecules are omitted for clarity.

There are two triflates in the asymmetric unit (in agreement with the protonation of the ligand and the valence state of the  $\text{Cr}^{3+}$ ). One triflate is disordered over two sites and modeled in two parts with refined occupancies 0.73/0.27. A water molecule is found close to this disordered triflate and was refined with occupancy fixed at 0.5. This water molecule could be involved in hydrogen bonding with the ordered triflate anion.

As it was observed for other complexes containing a  $\text{Hbiim}^-$  ligand such as  $[\text{Cr}(\text{Hbiim})_3]$ , there are intermolecular hydrogen bonds between two adjacent complexes through  $\text{N-H}\cdots\text{N}$  bonds (Figure A3-3). The  $\text{N}\cdots\text{H}$  and the  $\text{N}\cdots\text{H-N}$  distances are short (1.90 Å and 2.76 Å respectively, Table S22) showing strong interactions. This was also shown in the IR spectra of the complexes where the N-H stretching frequency is shifted toward lower energy compared with that observed for a typical free N-H bond (Figure S57, red trace).

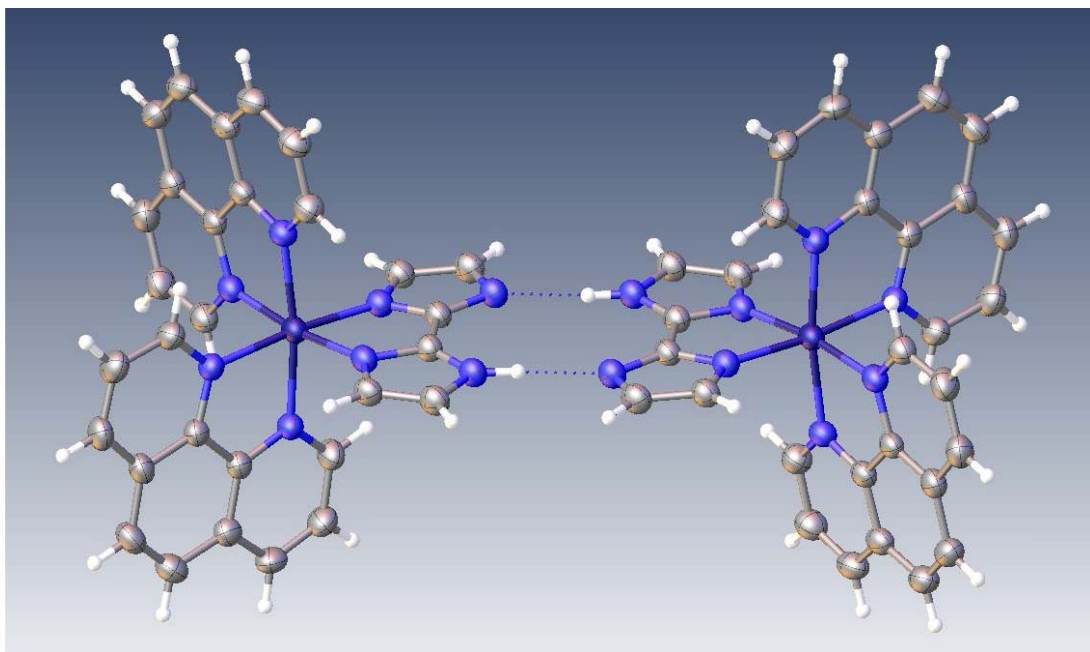

**Figure A3-3** Intermolecular H-bonds found between two adjacent complexes in the crystal structure of  $[\text{Cr}(\text{phen})_2(\text{Hbiim})](\text{CF}_3\text{SO}_3)_2(\text{H}_2\text{O})_{0.5}$ .

**Crystal structure of  $[\text{Cr}(\text{phen})_2(\text{biim})]\text{CF}_3\text{SO}_3(\text{CH}_3\text{OH})_{1.5}$**  (Table S24-S26).

Single crystal of  $[\text{Cr}(\text{phen})_2(\text{biim})]\text{CF}_3\text{SO}_3(\text{CH}_3\text{OH})_{1.5}$  suitable for X-ray diffraction were obtained by vapor diffusion of  $\text{Et}_2\text{O}$  into a solution of the complex in methanol.

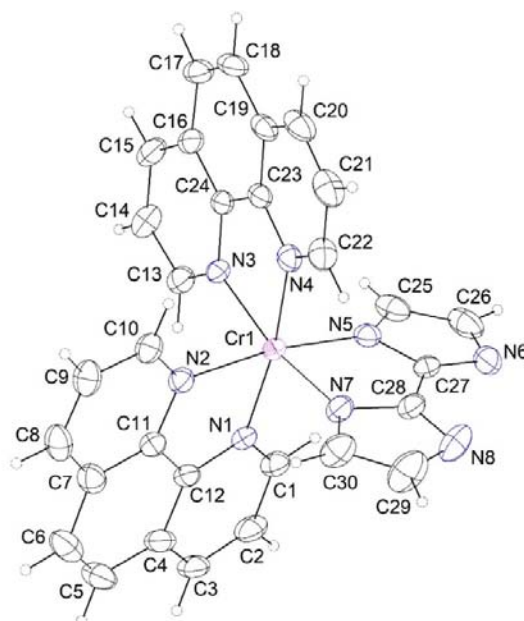

**Figure A3-4** Ortep view of  $[\text{Cr}(\text{phen})_2(\text{biim})]\text{CF}_3\text{SO}_3(\text{CH}_3\text{OH})_{1.5}$  (thermal ellipsoids are drawn at 50% probability level) with numbering scheme. Triflate counter ions and methanol molecules are omitted for clarity.

The complex crystallizes in the triclinic  $P\bar{1}$  space group with one triflate counterion and MeOH solvent molecules. One MeOH is fully ordered and makes H-bond with the triflate ion (Table S25). Another MeOH is disordered and refined with fixed 0.5 occupancy and with isotropic ADP.

### Structural analysis

For the cationic  $[\text{Cr}(\text{phen})_2(\text{H}_x\text{biim})]^{(1+x)+}$  complexes ( $x = 0-2$ ), the average N-Cr-N bite angles of the ligands lie between 80 and 81°, a value typical of Cr(III) complexes with 5-membered chelate rings,<sup>23</sup> which is the main contributor to the deviation from a perfect octahedral geometry. When we look at the parameters  $\Sigma$ ,  $\Theta$  and  $S_Q(P)$  for the distortion from the perfect octahedral geometry, we notice that the distortion is almost identical between these three complexes. In addition, they display similar distortion as their homoleptic parent complexes  $[\text{Cr}(\text{phen})_3]^{3+}$  and  $[\text{Cr}(\text{H}_2\text{biim})_3]^{3+}$  and are slightly less distorted than  $[\text{Cr}(\text{bpy})_3]^{3+}$ ,  $[\text{Cr}(\text{Hbiim})_3]$ ,  $[\text{Cr}(\text{Hbiim})_2(\text{biim})]^-$  and  $[\text{Cr}(\text{Me}_2\text{biim})_3]^{3+}$  (Table A2-1). These small differences are weak compared to the difference in distortion between complexes with 6-membered and 5-membered chelate rings (Table A2-1).

## Appendix 4 Theoretical calculations of the electronic structures of heteroleptic complexes $[\text{Cr}(\text{phen})_2(\text{H}_x\text{biim})]^{(1+x)+}$ .

### *Theoretical studies*

The Orca<sup>A4-1</sup> (version 5.0.2) software package was used to investigate the structural and electronic properties of the studied complexes. Starting from the X-ray diffraction structures, the ground,  $^4\text{A}_2$  state, structure of the three complexes were obtained from DFT optimizations using the Becke three-parameters exchange function in combination with the Lee-Yang-Parr correlation functional (B3LYP). The Ahlrichs' polarized valence triple- $\zeta$  basis set def2-TZVPP was used for these optimizations. The D3 version of Grimme's dispersion with Becke-Johnson damping (GD3BJ) was applied. Solvent effects were included via the Conductor-like Polarizable Continuum Model (CPCM) as implemented in Orca 5.0.2 with the dielectric constant of acetonitrile. Optimized geometries were confirmed to be stationary points by analysis of their vibrational frequencies. Tight convergence criteria were selected for the optimization step. The resolution of identity approach for the Coulomb term in combination with the chain-of-spheres approximation for the exchange term (RIJCOSX) was applied. The zero-order relativistic approximation (ZORA) was used to describe relativistic effects in all calculations. Spin density information was extracted from the optimized geometries.

Ab initio ligand field (AILF) analysis was performed over the optimized geometries using Orca version 5.0.2. The complete-active-space self-consistent field method (CASSCF) together with the fully internally contracted N-electron valence perturbation theory to second order (FIC-NEVPT2) was used, selecting only the 3d orbitals as active space (CASSCF(3,5)/FIC-NEVPT2) and using the def2-TZVPP basis set in combination with the RI-JK approximation (def2/JK as auxiliary base). 10 quartet and 40 doublet roots were computed for the AILF analysis.

Subsequently, the active space was expanded to accurately model the ligand field. Dominant bonding/antibonding orbitals formed between ligand and chromium and a second d shell were considered, creating an active space of 7 electrons and 12 orbitals (CASSCF(7,12)/FIC-NEVPT2). 10 quartet and 9 doublet roots were computed to calculate the energies of the excited states.

The 200 lowest energetic transitions (100 for  $[\text{Cr}(\text{phen})_2(\text{H}_2\text{biim})]^{3+}$ ) were calculated by TD-DFT using the Tamm-Dancoff approximation (TDA) as implemented in Orca 5.0.2, using the B3LYP functional, selecting the def2-TZVPP basis set and considering solvent effects. Charge transfer numbers were computed using TheoDORE 3.1.1.<sup>A4-2</sup>

Optimized geometries

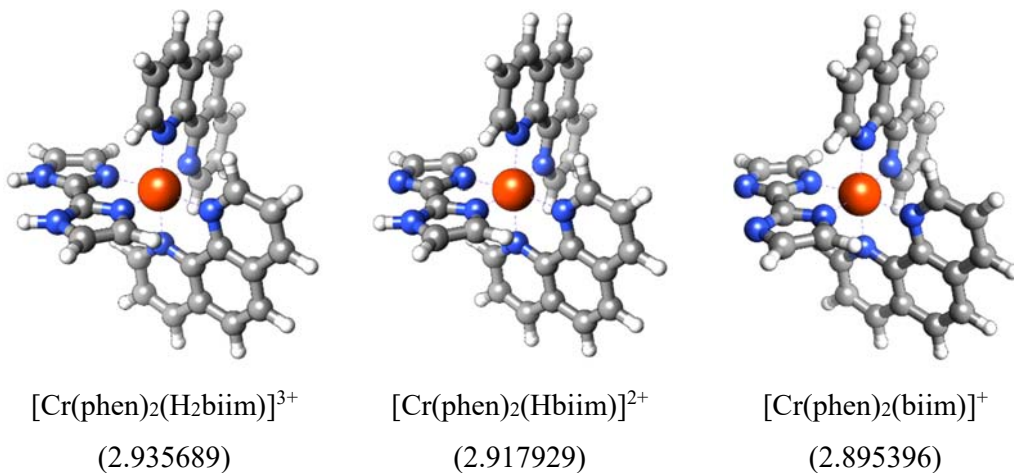

**Figure A4-1** DFT optimized geometries of the  $[\text{Cr}(\text{phen})_2(\text{H}_2\text{biim})]^{3+}$ ,  $[\text{Cr}(\text{phen})_2(\text{Hbiim})]^{2+}$  and  $[\text{Cr}(\text{phen})_2(\text{biim})]^+$  species, and spin density at the Cr center (in brackets).

*Ab initio ligand field analysis*

**Table A4-1** AILF parameters computed from CASSCF(3,5)/FIC-NEVPT2 (in  $\text{cm}^{-1}$ ).

|                                                          | <i>B</i> | <i>C</i> | <i>C/B</i> |
|----------------------------------------------------------|----------|----------|------------|
| $[\text{Cr}(\text{phen})_2(\text{H}_2\text{biim})]^{3+}$ | 978      | 3018     | 3.086      |
| $[\text{Cr}(\text{phen})_2(\text{Hbiim})]^{2+}$          | 973      | 2988     | 3.070      |
| $[\text{Cr}(\text{phen})_2(\text{biim})]^+$              | 964      | 2980     | 3.092      |

## Complete active space analysis of excited states

Table A4-2 CASSCF(7,12)/FIC-NEVPT2 results. Energies in  $\text{cm}^{-1}$ .

|                                                          | ${}^2E$ (1) | ${}^2E$ (2) | ${}^2T_1$ (1) | ${}^2T_1$ (2) | ${}^2T_1$ (3) | ${}^2T_2$ (1) | ${}^2T_2$ (2) | ${}^2T_2$ (3) | ${}^4T_2$ (1) | ${}^4T_2$ (2) | ${}^4T_2$ (3) |
|----------------------------------------------------------|-------------|-------------|---------------|---------------|---------------|---------------|---------------|---------------|---------------|---------------|---------------|
| $[\text{Cr}(\text{phen})_2(\text{H}_2\text{biim})]^{3+}$ | 15526       | 15953       | 15547         | 16066         | 16130         | 23400         | 23540         | 23722         | 23266         | 23317         | 23383         |
| $[\text{Cr}(\text{phen})_2(\text{Hbiim})]^{2+}$          | 15397       | 15425       | 15785         | 15831         | 15970         | 23251         | 23407         | 23510         | 22356         | 22365         | 24493         |
| $[\text{Cr}(\text{phen})_2(\text{biim})]^+$              | 15197       | 15653       | 15086         | 15574         | 15632         | 22766         | 23037         | 23052         | 21307         | 21331         | 25909         |

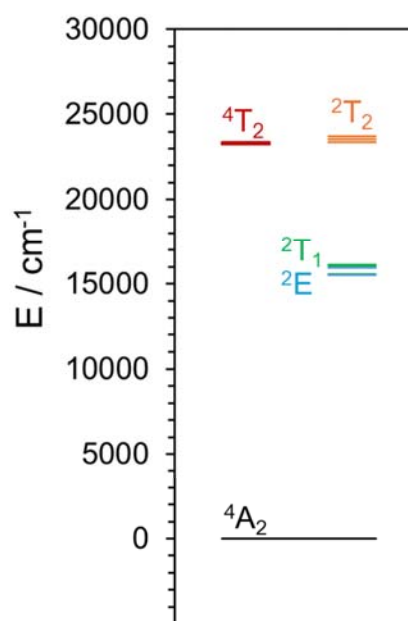 $[\text{Cr}(\text{phen})_2(\text{H}_2\text{biim})]^{3+}$ 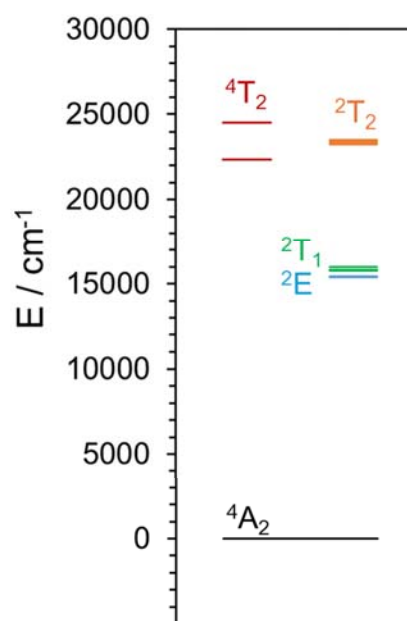 $[\text{Cr}(\text{phen})_2(\text{Hbiim})]^{2+}$ 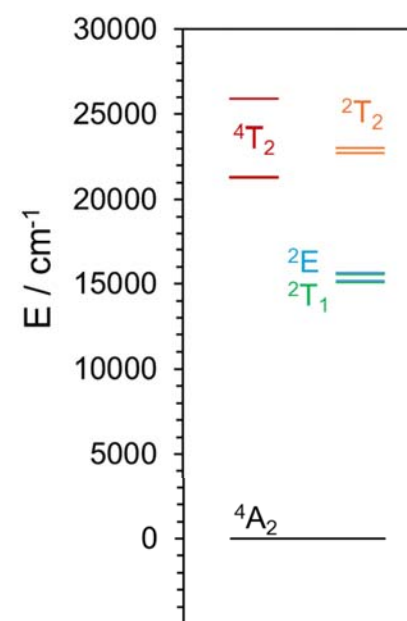 $[\text{Cr}(\text{phen})_2(\text{biim})]^+$

**Table A4-3** Orbitals used in the CASSCF(7,12)/FIC-NEVPT2 calculations for  $[\text{Cr}(\text{phen})_2(\text{H}_2\text{biim})]^{3+}$ .

| #   | E (Hartrees) | Orbital                                                                             | #   | E (Hartrees) | Orbital                                                                               |
|-----|--------------|-------------------------------------------------------------------------------------|-----|--------------|---------------------------------------------------------------------------------------|
| 136 | -0.891320    | 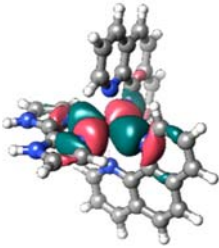   | 142 | -0.203890    |    |
| 137 | -0.884149    |    | 143 | 0.698149     |    |
| 138 | -0.420341    |   | 144 | 0.700649     |   |
| 139 | -0.419759    |  | 145 | 0.756566     |  |
| 140 | -0.418668    |  | 146 | 1.366547     |  |

|     |           |                                                                                   |     |          |                                                                                     |
|-----|-----------|-----------------------------------------------------------------------------------|-----|----------|-------------------------------------------------------------------------------------|
| 141 | -0.205857 | 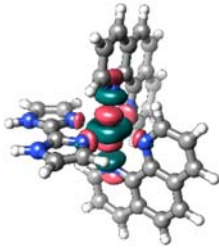 | 147 | 1.380778 |  |
|-----|-----------|-----------------------------------------------------------------------------------|-----|----------|-------------------------------------------------------------------------------------|

**Table A4-4** Orbitals used in the CASSCF(7,12)/FIC-NEVPT2 calculations for  $[\text{Cr}(\text{phen})_2(\text{Hbiim})]^{2+}$ .

| #   | E (Hartrees) | Orbital                                                                             | #   | E (Hartrees) | Orbital                                                                               |
|-----|--------------|-------------------------------------------------------------------------------------|-----|--------------|---------------------------------------------------------------------------------------|
| 136 | -0.779656    | 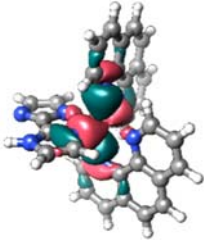   | 142 | -0.081906    |    |
| 137 | -0.764893    |   | 143 | 0.795968     |   |
| 138 | -0.309476    |  | 144 | 0.823302     |  |
| 139 | -0.301398    |  | 145 | 0.863583     |  |



|     |           |                                                                                   |     |          |                                                                                     |
|-----|-----------|-----------------------------------------------------------------------------------|-----|----------|-------------------------------------------------------------------------------------|
| 140 | -0.297620 | 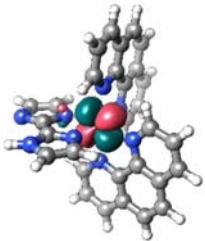 | 146 | 1.476010 |  |
| 141 | -0.094737 |  | 147 | 1.505554 |  |

**Table A4-5** Orbitals used in the CASSCF(7,12)/FIC-NEVPT2 calculations for  $[\text{Cr}(\text{phen})_2(\text{biim})]^+$ .

| #   | E (Hartrees) | Orbital                                                                             | #   | E (Hartrees) | Orbital                                                                               |
|-----|--------------|-------------------------------------------------------------------------------------|-----|--------------|---------------------------------------------------------------------------------------|
| 136 | -0.661291    | 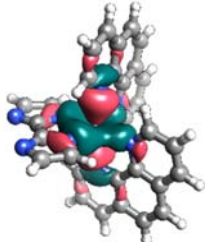 | 142 | 0.040646     |  |
| 137 | -0.632695    |  | 143 | 0.879064     |  |
| 138 | -0.194363    |  | 144 | 0.931572     |  |

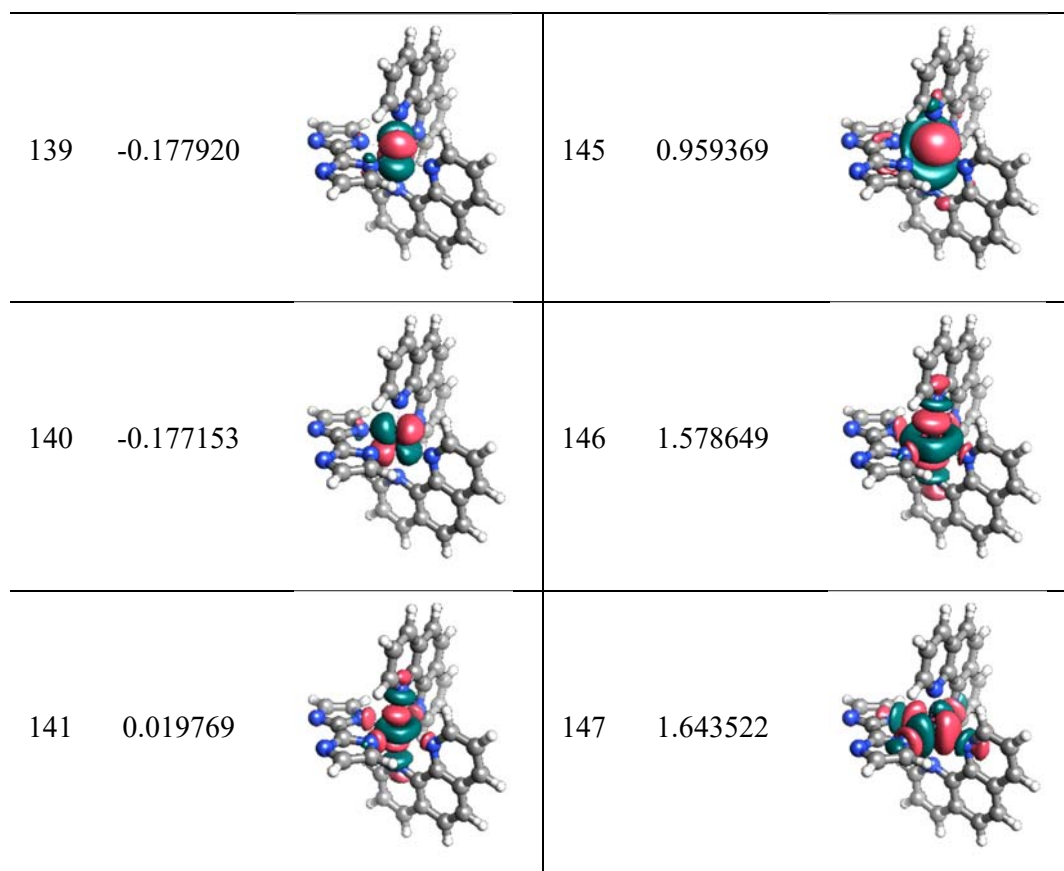

*Electronic transitions***Table A4-6** Calculated 100 lowest electronic transitions for compound  $[\text{Cr}(\text{phen})_2(\text{H}_2\text{biim})]^{3+}$ , their energies (in nm) and oscillatory strength (in cgs units).

| Transition number | Wavelength / nm | Osc. Strength / cgs | Transition number | Wavelength / nm | Osc. Strength / cgs |
|-------------------|-----------------|---------------------|-------------------|-----------------|---------------------|
| 1                 | 443.6           | 0.008684030         | 51                | 280.8           | 0.000452941         |
| 2                 | 439.6           | 0.004200170         | 52                | 280.5           | 0.048391800         |
| 3                 | 412.9           | 0.000003947         | 53                | 277.6           | 0.037550200         |
| 4                 | 408.6           | 0.000502561         | 54                | 276.9           | 0.002606690         |
| 5                 | 408.1           | 0.000539178         | 55                | 276.6           | 0.004495860         |
| 6                 | 407.3           | 0.003104320         | 56                | 275.8           | 0.004360860         |
| 7                 | 400.0           | 0.000081510         | 57                | 272.2           | 0.000053585         |
| 8                 | 392.1           | 0.000468006         | 58                | 271.7           | 0.000138697         |
| 9                 | 391.5           | 0.000372989         | 59                | 271.5           | 0.006154400         |
| 10                | 371.8           | 0.007424990         | 60                | 270.8           | 0.000433198         |
| 11                | 370.2           | 0.000681299         | 61                | 268.9           | 0.002043610         |
| 12                | 369.9           | 0.002925900         | 62                | 268.8           | 0.003389300         |
| 13                | 365.5           | 0.000626678         | 63                | 268.5           | 0.134595000         |
| 14                | 364.0           | 0.009016750         | 64                | 267.7           | 0.206803000         |
| 15                | 361.4           | 0.000112825         | 65                | 267.4           | 0.007183370         |
| 16                | 352.1           | 0.000090076         | 66                | 266.9           | 0.013824500         |
| 17                | 351.7           | 0.006467370         | 67                | 266.7           | 0.013959400         |
| 18                | 351.2           | 0.001258590         | 68                | 264.5           | 0.032832100         |
| 19                | 346.4           | 0.000270970         | 69                | 264.1           | 0.017612800         |
| 20                | 344.2           | 0.000002756         | 70                | 262.6           | 0.156393000         |
| 21                | 337.8           | 0.000625391         | 71                | 262.1           | 0.055324000         |
| 22                | 336.1           | 0.044363800         | 72                | 260.6           | 0.337505000         |
| 23                | 333.7           | 0.006406020         | 73                | 260.1           | 0.006237730         |
| 24                | 330.1           | 0.006118370         | 74                | 260.0           | 0.000077023         |
| 25                | 329.4           | 0.002729690         | 75                | 258.7           | 0.026949900         |
| 26                | 328.7           | 0.016821800         | 76                | 257.9           | 0.005224130         |
| 27                | 326.1           | 0.005594130         | 77                | 256.7           | 0.023204100         |
| 28                | 317.0           | 0.000495467         | 78                | 256.6           | 0.086377700         |
| 29                | 316.9           | 0.007398730         | 79                | 255.1           | 0.006831260         |
| 30                | 315.4           | 0.001657430         | 80                | 254.5           | 0.008499690         |
| 31                | 313.5           | 0.029874000         | 81                | 254.4           | 0.022430900         |
| 32                | 312.3           | 0.000800702         | 82                | 254.1           | 0.012325700         |
| 33                | 310.8           | 0.000979412         | 83                | 253.8           | 0.000202867         |
| 34                | 310.5           | 0.000389834         | 84                | 252.7           | 0.012082700         |

|    |       |             |     |       |             |
|----|-------|-------------|-----|-------|-------------|
| 35 | 310.2 | 0.000124672 | 85  | 252.5 | 0.061711300 |
| 36 | 307.4 | 0.000016240 | 86  | 252.1 | 0.001091380 |
| 37 | 304.4 | 0.000410148 | 87  | 250.5 | 0.007870940 |
| 38 | 303.6 | 0.018642900 | 88  | 250.0 | 0.062026400 |
| 39 | 303.3 | 0.019057600 | 89  | 249.9 | 0.002682560 |
| 40 | 301.0 | 0.000372178 | 90  | 248.9 | 0.000626233 |
| 41 | 297.4 | 0.014590400 | 91  | 248.6 | 0.001237280 |
| 42 | 297.1 | 0.035206300 | 92  | 247.5 | 0.001268180 |
| 43 | 289.5 | 0.010439100 | 93  | 247.2 | 0.017915500 |
| 44 | 288.6 | 0.001388210 | 94  | 245.9 | 0.017769900 |
| 45 | 285.9 | 0.000430932 | 95  | 245.7 | 0.004281680 |
| 46 | 285.7 | 0.000730861 | 96  | 245.6 | 0.024821500 |
| 47 | 283.7 | 0.010229600 | 97  | 245.3 | 0.001892550 |
| 48 | 283.3 | 0.063454700 | 98  | 242.9 | 0.002968190 |
| 49 | 282.6 | 0.005133940 | 99  | 242.5 | 0.006601790 |
| 50 | 282.2 | 0.002848400 | 100 | 242.2 | 0.004056090 |

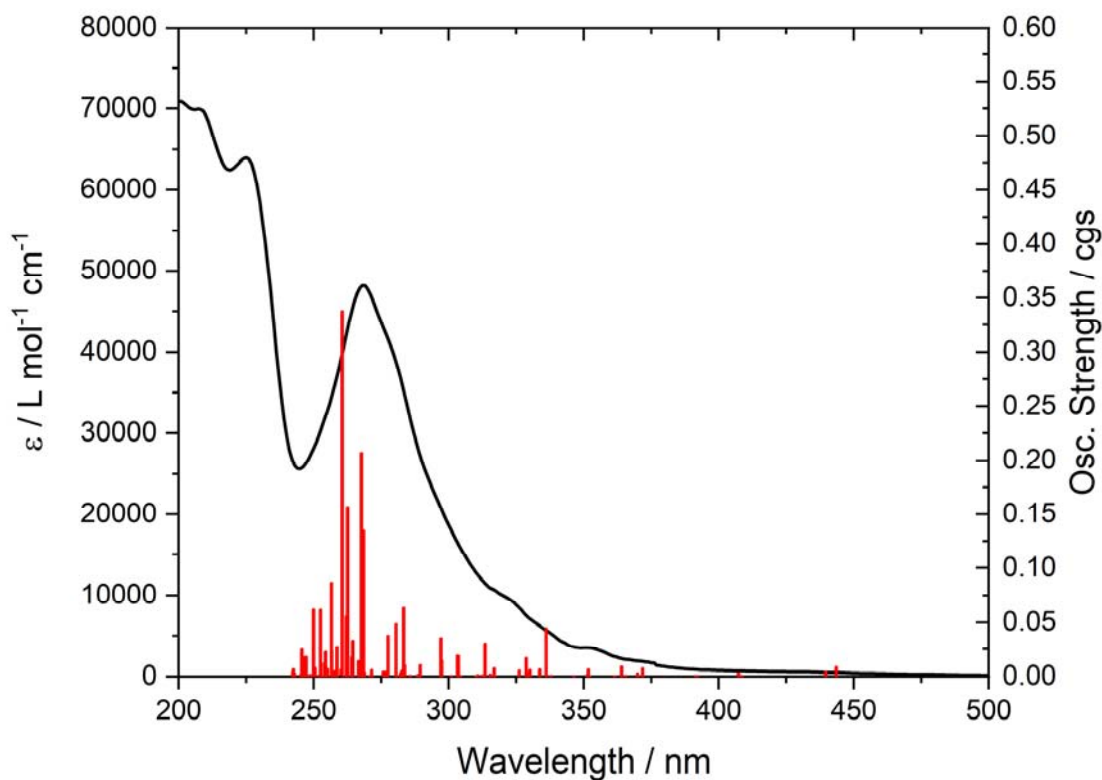

**Figure A4-2** Experimental UV-Vis spectrum of compound  $[\text{Cr}(\text{phen})_2(\text{H}_2\text{biim})]^{3+}$  in acetonitrile and calculated oscillatory strength of the 100 lowest energetic electronic transitions.

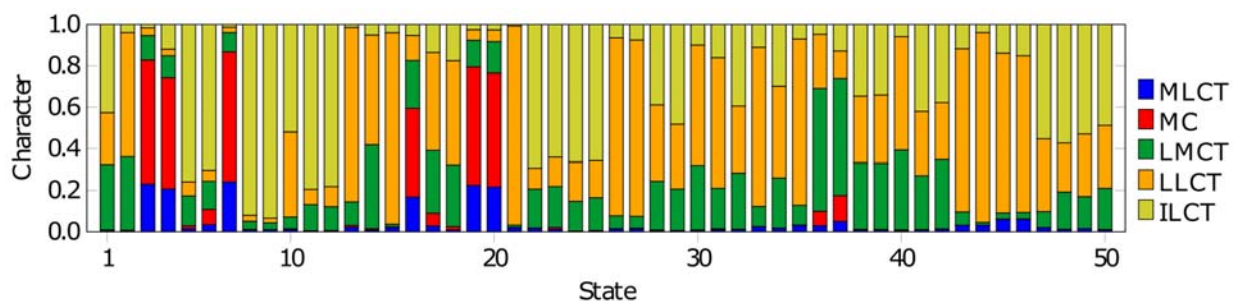

**Figure A4-3** TD-DFT charge transfer numbers of  $[\text{Cr}(\text{phen})_2(\text{H}_2\text{biim})]^{3+}$  defined from 0 to 1 of the first 50 electronic transitions.

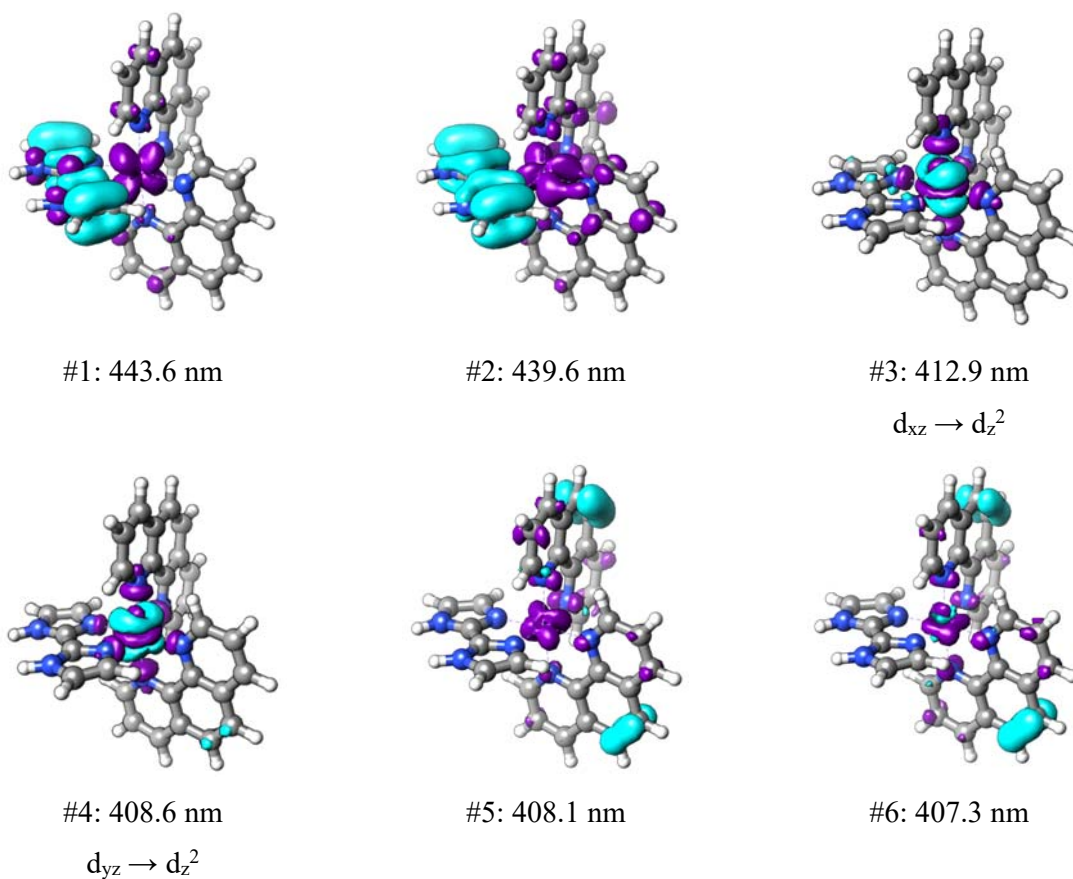

**Figure A4-4** Electron density difference maps (EDDM) of the first six electronic transitions calculated for  $[\text{Cr}(\text{phen})_2(\text{H}_2\text{biim})]^{3+}$  (isoval 0.002). Blue: density loss; Purple: density gain.

**Table A4-7** Calculated 100 lowest electronic transitions for compound  $[\text{Cr}(\text{phen})_2(\text{Hbiim})]^{2+}$ , their energies (in nm) and oscillatory strength (in cgs units).

| Transition number | Wavelength / nm | Osc. Strength / cgs | Transition number | Wavelength / nm | Osc. Strength / cgs |
|-------------------|-----------------|---------------------|-------------------|-----------------|---------------------|
| 1                 | 566.4           | 0.004596640         | 51                | 291.2           | 0.004050420         |
| 2                 | 534.3           | 0.005268420         | 52                | 289.4           | 0.009219620         |
| 3                 | 469.4           | 0.000118195         | 53                | 288.1           | 0.002303550         |
| 4                 | 463.1           | 0.000141174         | 54                | 287.0           | 0.007927360         |
| 5                 | 447.4           | 0.006781430         | 55                | 286.3           | 0.008708070         |
| 6                 | 434.0           | 0.000048876         | 56                | 286.1           | 0.001068170         |
| 7                 | 427.3           | 0.000980469         | 57                | 284.2           | 0.003812250         |
| 8                 | 420.7           | 0.000088355         | 58                | 283.9           | 0.024528600         |
| 9                 | 416.6           | 0.000627904         | 59                | 281.4           | 0.023803000         |
| 10                | 412.1           | 0.001962710         | 60                | 280.3           | 0.046702100         |
| 11                | 398.8           | 0.000451316         | 61                | 279.1           | 0.011031800         |
| 12                | 398.1           | 0.001755930         | 62                | 278.1           | 0.000094897         |
| 13                | 394.5           | 0.000434629         | 63                | 277.1           | 0.015710900         |
| 14                | 390.5           | 0.000081918         | 64                | 275.9           | 0.059112800         |
| 15                | 389.7           | 0.000614485         | 65                | 275.0           | 0.048348900         |
| 16                | 389.4           | 0.000821501         | 66                | 274.3           | 0.066134600         |
| 17                | 377.6           | 0.004545730         | 67                | 273.9           | 0.104217000         |
| 18                | 372.9           | 0.000872146         | 68                | 273.5           | 0.058007600         |
| 19                | 363.9           | 0.000932181         | 69                | 272.9           | 0.045260800         |
| 20                | 363.8           | 0.001636730         | 70                | 271.0           | 0.072973600         |
| 21                | 357.2           | 0.001609420         | 71                | 269.7           | 0.018385800         |
| 22                | 353.3           | 0.000130741         | 72                | 269.5           | 0.016121000         |
| 23                | 348.4           | 0.000377243         | 73                | 268.5           | 0.004174580         |
| 24                | 345.0           | 0.017727500         | 74                | 267.6           | 0.005838330         |
| 25                | 339.4           | 0.007911210         | 75                | 267.1           | 0.004906950         |
| 26                | 338.7           | 0.009075230         | 76                | 266.6           | 0.065096800         |
| 27                | 337.5           | 0.001279740         | 77                | 265.9           | 0.012984400         |
| 28                | 327.8           | 0.035997000         | 78                | 265.1           | 0.006392850         |
| 29                | 325.8           | 0.002736710         | 79                | 264.8           | 0.003847310         |
| 30                | 325.7           | 0.003508300         | 80                | 263.8           | 0.002875360         |
| 31                | 324.8           | 0.008019030         | 81                | 263.2           | 0.031525300         |
| 32                | 318.4           | 0.000112590         | 82                | 262.9           | 0.008410900         |
| 33                | 313.3           | 0.002812290         | 83                | 262.3           | 0.004274560         |
| 34                | 312.4           | 0.002506810         | 84                | 261.7           | 0.008883700         |
| 35                | 311.1           | 0.001411970         | 85                | 261.4           | 0.053049400         |

|    |       |             |     |       |             |
|----|-------|-------------|-----|-------|-------------|
| 36 | 309.5 | 0.006370950 | 86  | 260.8 | 0.019480900 |
| 37 | 308.9 | 0.001882520 | 87  | 260.7 | 0.135591000 |
| 38 | 308.4 | 0.000651465 | 88  | 260.2 | 0.077877700 |
| 39 | 306.1 | 0.001157850 | 89  | 259.9 | 0.039955200 |
| 40 | 305.5 | 0.010225100 | 90  | 259.2 | 0.004400340 |
| 41 | 303.1 | 0.002825680 | 91  | 259.0 | 0.006065760 |
| 42 | 302.2 | 0.001841950 | 92  | 258.4 | 0.027450100 |
| 43 | 302.0 | 0.000410570 | 93  | 257.9 | 0.172672000 |
| 44 | 301.3 | 0.006216080 | 94  | 257.1 | 0.005134770 |
| 45 | 300.0 | 0.006261650 | 95  | 256.8 | 0.115770000 |
| 46 | 296.3 | 0.004163640 | 96  | 255.8 | 0.010901800 |
| 47 | 295.2 | 0.001886810 | 97  | 254.8 | 0.000557923 |
| 48 | 295.0 | 0.001080160 | 98  | 253.9 | 0.001951630 |
| 49 | 294.0 | 0.007871320 | 99  | 253.6 | 0.002959890 |
| 50 | 293.6 | 0.011954100 | 100 | 252.9 | 0.010650700 |

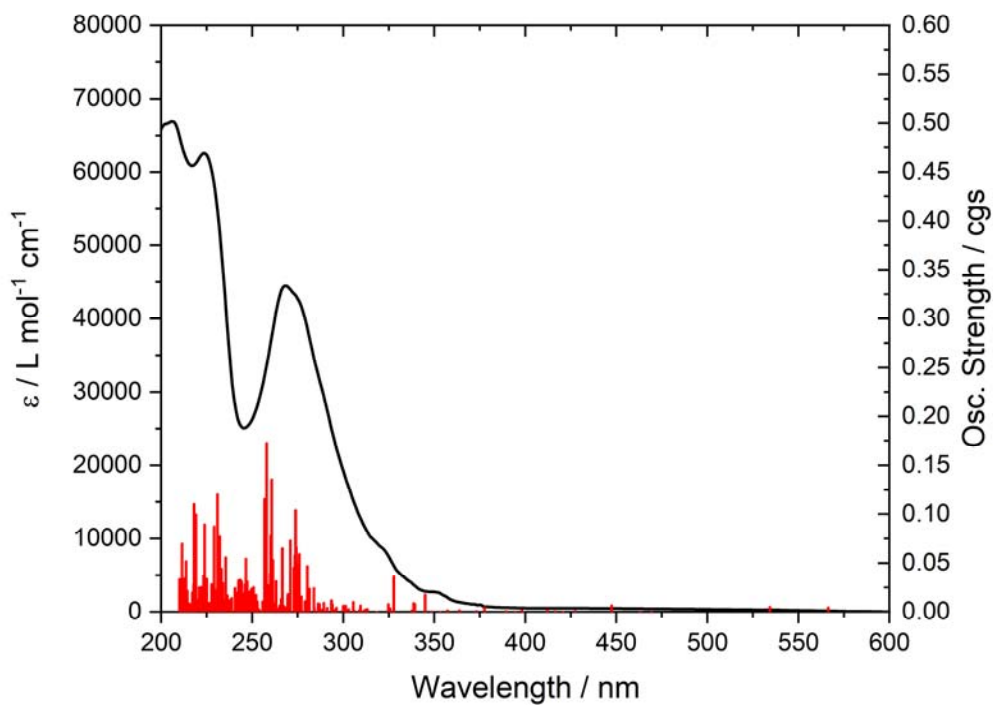

**Figure A4-5** Experimental UV-Vis spectrum of compound  $[\text{Cr}(\text{phen})_2(\text{Hbiim})]^{2+}$  in acetonitrile and calculated oscillatory strength of the 200 lowest energetic electronic transitions.

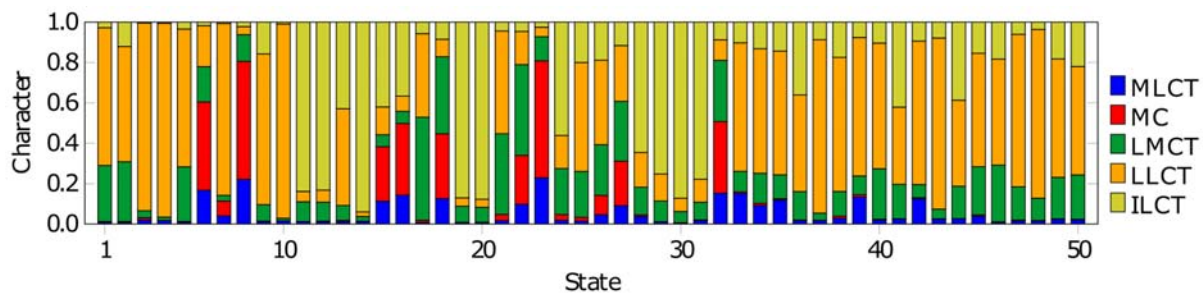

**Figure A4-6** TD-DFT charge transfer numbers of  $[\text{Cr}(\text{phen})_2(\text{Hbiim})]^{2+}$  defined from 0 to 1 of the first 50 electronic transitions.

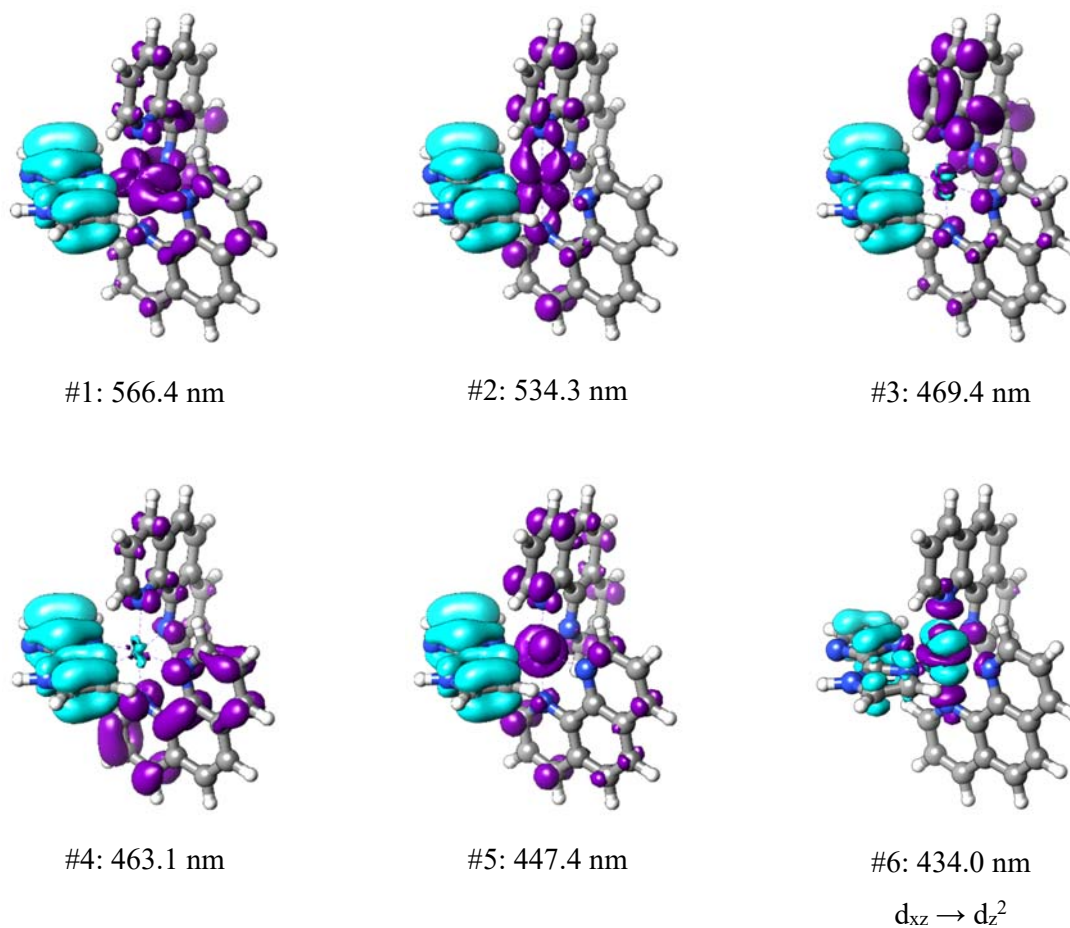

**Figure A4-7** Electron density difference maps (EDDM) of the first six electronic transitions calculated for  $[\text{Cr}(\text{phen})_2(\text{Hbiim})]^{2+}$  (isoval 0.002). Blue: density loss; Purple: density gain.



**Table A4-8** Calculated 100 lowest electronic transitions for compound [Cr(phen)<sub>2</sub>(biim)]<sup>+</sup>, their energies (in nm) and oscillatory strength (in cgs units).

| Transition number | Wavelength / nm | Osc. Strength / cgs | Transition number | Wavelength / nm | Osc. Strength / cgs |
|-------------------|-----------------|---------------------|-------------------|-----------------|---------------------|
| 1                 | 743.2           | 0.005162030         | 51                | 312.6           | 0.001339400         |
| 2                 | 672.4           | 0.003632770         | 52                | 312.2           | 0.001045720         |
| 3                 | 608.5           | 0.000180943         | 53                | 309.8           | 0.003239630         |
| 4                 | 598.7           | 0.000107971         | 54                | 306.2           | 0.000508441         |
| 5                 | 559.5           | 0.004714040         | 55                | 305.7           | 0.003287360         |
| 6                 | 545.9           | 0.001512890         | 56                | 304.2           | 0.000308149         |
| 7                 | 522.8           | 0.000707693         | 57                | 303.8           | 0.012285100         |
| 8                 | 515.3           | 0.001252780         | 58                | 303.4           | 0.005968410         |
| 9                 | 457.8           | 0.000112575         | 59                | 303.3           | 0.000710819         |
| 10                | 448.8           | 0.001659430         | 60                | 302.9           | 0.000030120         |
| 11                | 435.7           | 0.000105183         | 61                | 300.7           | 0.009417540         |
| 12                | 431.8           | 0.004900050         | 62                | 300.0           | 0.010808800         |
| 13                | 414.5           | 0.001801360         | 63                | 297.5           | 0.000137734         |
| 14                | 393.2           | 0.000702125         | 64                | 296.6           | 0.000075741         |
| 15                | 392.8           | 0.000508584         | 65                | 295.9           | 0.003307420         |
| 16                | 390.9           | 0.000503117         | 66                | 295.2           | 0.000083379         |
| 17                | 390.7           | 0.000249496         | 67                | 294.5           | 0.004039320         |
| 18                | 388.8           | 0.000435071         | 68                | 294.2           | 0.000335155         |
| 19                | 377.9           | 0.000198224         | 69                | 293.1           | 0.009109290         |
| 20                | 377.7           | 0.000287311         | 70                | 292.9           | 0.000052618         |
| 21                | 367.3           | 0.000924150         | 71                | 292.3           | 0.007644430         |
| 22                | 365.7           | 0.001221750         | 72                | 289.0           | 0.000998633         |
| 23                | 360.4           | 0.000741620         | 73                | 287.3           | 0.009351400         |
| 24                | 360.0           | 0.001260070         | 74                | 287.1           | 0.008619100         |
| 25                | 356.2           | 0.000362403         | 75                | 286.9           | 0.002418320         |
| 26                | 355.8           | 0.000063135         | 76                | 286.1           | 0.001830420         |
| 27                | 348.8           | 0.003068860         | 77                | 285.3           | 0.015232700         |
| 28                | 347.2           | 0.000069999         | 78                | 285.0           | 0.007694390         |
| 29                | 346.9           | 0.000095189         | 79                | 284.6           | 0.001191160         |
| 30                | 344.5           | 0.006339210         | 80                | 283.8           | 0.005602730         |
| 31                | 339.4           | 0.015360100         | 81                | 282.6           | 0.000136658         |
| 32                | 337.4           | 0.001710730         | 82                | 280.6           | 0.000034403         |
| 33                | 335.6           | 0.017587200         | 83                | 280.4           | 0.004017230         |
| 34                | 332.0           | 0.005794030         | 84                | 279.8           | 0.005845910         |
| 35                | 331.2           | 0.001259990         | 85                | 279.4           | 0.001801960         |

|    |       |             |     |       |             |
|----|-------|-------------|-----|-------|-------------|
| 36 | 330.1 | 0.009961350 | 86  | 278.5 | 0.005848540 |
| 37 | 329.3 | 0.001857910 | 87  | 277.5 | 0.001645100 |
| 38 | 325.3 | 0.000258103 | 88  | 277.2 | 0.029356300 |
| 39 | 324.0 | 0.000550063 | 89  | 276.9 | 0.005350750 |
| 40 | 323.2 | 0.001991950 | 90  | 275.0 | 0.023024100 |
| 41 | 322.6 | 0.008015820 | 91  | 274.8 | 0.029808000 |
| 42 | 320.0 | 0.004326270 | 92  | 273.0 | 0.046684200 |
| 43 | 319.3 | 0.007604530 | 93  | 272.8 | 0.007550800 |
| 44 | 319.2 | 0.000530403 | 94  | 272.3 | 0.011162500 |
| 45 | 318.9 | 0.002751250 | 95  | 271.7 | 0.138661000 |
| 46 | 317.9 | 0.005204030 | 96  | 271.2 | 0.008516900 |
| 47 | 317.0 | 0.000473341 | 97  | 271.1 | 0.013172000 |
| 48 | 316.7 | 0.001168860 | 98  | 270.3 | 0.094301200 |
| 49 | 316.6 | 0.002729880 | 99  | 269.0 | 0.059184700 |
| 50 | 315.9 | 0.003529530 | 100 | 267.4 | 0.001624330 |

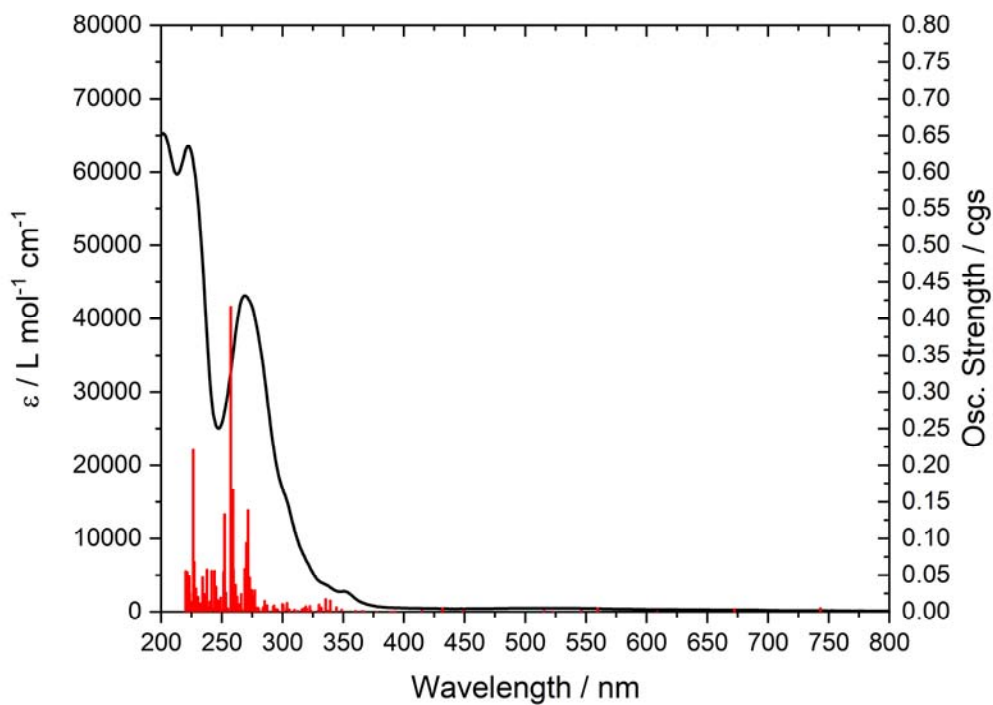

**Figure A4-8** Experimental UV-Vis spectrum of compound  $[\text{Cr}(\text{phen})_2(\text{biim})]^+$  in acetonitrile and calculated oscillatory strength of the 200 lowest energetic electronic transitions.

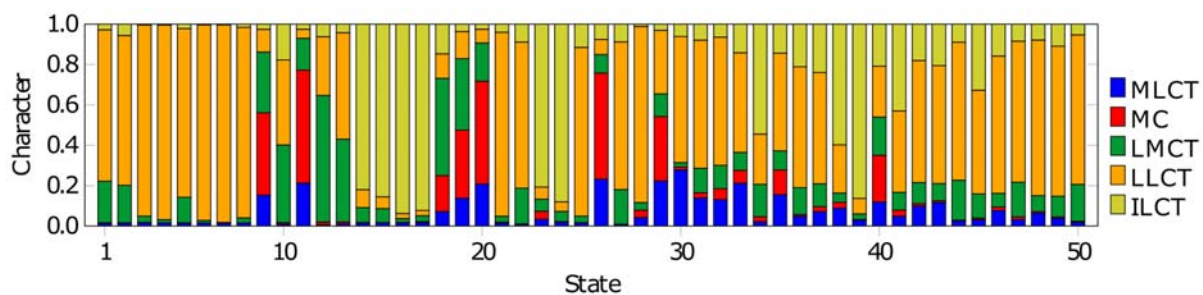

**Figure A4-9** TD-DFT charge transfer numbers of  $[\text{Cr}(\text{phen})_2(\text{biim})]^+$  defined from 0 to 1 of the first 50 electronic transitions.

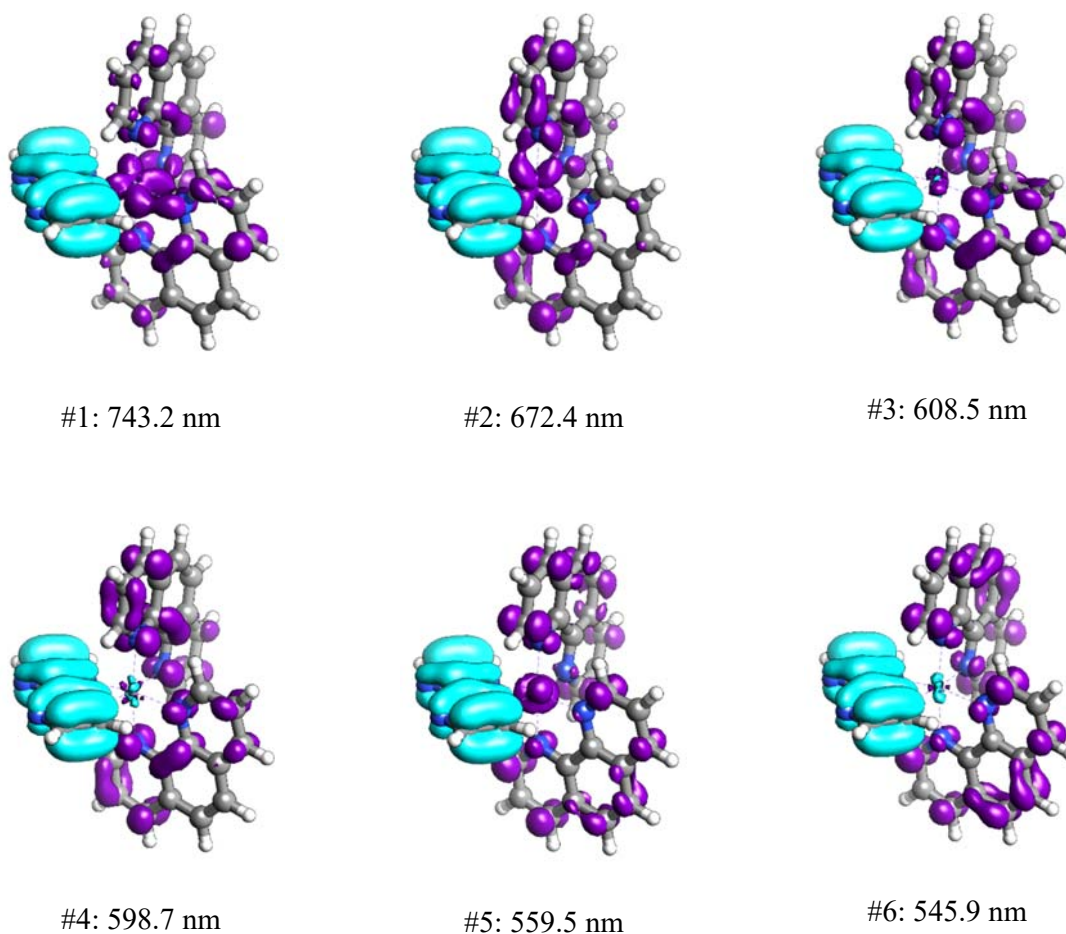

**Figure A4-10** Electron density difference maps (EDDM) of the first six electronic transitions calculated for  $[\text{Cr}(\text{phen})_2(\text{biim})]^+$  (isoval 0.002). Blue: density loss; Purple: density gain.

*Cartesian Coordinates* $[\text{Cr}(\text{phen})_2(\text{H}_2\text{biim})]^{3+}$ 

|    |                   |                   |                   |
|----|-------------------|-------------------|-------------------|
| Cr | 13.39652581016843 | 8.44517494825328  | 1.92071204482586  |
| N  | 13.16110566941928 | 7.60163285302686  | 0.05443726758416  |
| N  | 11.72059196272172 | 9.47827970413944  | 1.30002892014835  |
| N  | 15.17170600936965 | 7.46611862757432  | 2.31514743524783  |
| N  | 14.72034540160341 | 9.87021935764767  | 1.23215826278000  |
| N  | 13.36858499514523 | 9.21766927421614  | 3.81805857546584  |
| N  | 12.22387862865891 | 7.04648335124162  | 2.85017741640787  |
| N  | 12.70527644165193 | 9.02771314211632  | 5.89653026485544  |
| H  | 12.25198034175289 | 8.67359166464811  | 6.72729152155713  |
| N  | 11.22810633704440 | 6.37019199669175  | 4.67985727715973  |
| H  | 10.92163187698761 | 6.32969569931651  | 5.64191883248424  |
| C  | 13.90016501908737 | 6.66835105347498  | -0.53314750006157 |
| H  | 14.74501737471951 | 6.28732529981860  | 0.01974058092418  |
| C  | 13.60784349143716 | 6.19024205063817  | -1.81404394573382 |
| H  | 14.24166730690082 | 5.43117416972404  | -2.24725500728140 |
| C  | 12.52393408559794 | 6.69214495901225  | -2.49650265081674 |
| H  | 12.27900328232070 | 6.33702803503998  | -3.48848385729473 |
| C  | 11.72249817556623 | 7.68182882535133  | -1.89641419694530 |
| C  | 10.57629423913011 | 8.26773025152439  | -2.52082403805996 |
| H  | 10.30697530566194 | 7.93317242926128  | -3.51313588370708 |
| C  | 9.84317793319645  | 9.21885981694994  | -1.88649307076888 |
| H  | 8.97726352869065  | 9.65780306711766  | -2.36271122783801 |
| C  | 10.19426135139827 | 9.66590029126946  | -0.57369287581118 |
| C  | 9.47898031247672  | 10.64544272287814 | 0.14099227190748  |
| H  | 8.60821388931893  | 11.10382090649023 | -0.30817201886379 |
| C  | 9.89634300415127  | 11.00814107435498 | 1.40088157532445  |
| H  | 9.36824663836717  | 11.75540444906713 | 1.97378596990061  |
| C  | 11.02677538450638 | 10.40125465686067 | 1.95560866887884  |
| H  | 11.37702849729144 | 10.67130918677373 | 2.94017356244955  |
| C  | 11.31770499707503 | 9.10476313791050  | 0.05634010479362  |
| C  | 12.08604876497781 | 8.10772566533585  | -0.60801517651066 |
| C  | 15.35556115589464 | 6.26787163840074  | 2.85710812892610  |
| H  | 14.47229882964490 | 5.70021808023413  | 3.10806158915375  |

|   |                   |                   |                   |
|---|-------------------|-------------------|-------------------|
| C | 16.63308901340075 | 5.74971508926531  | 3.08926664122482  |
| H | 16.72804608273549 | 4.76906362684513  | 3.53066835592233  |
| C | 17.74044943972898 | 6.49320547582377  | 2.75167931854269  |
| H | 18.73809796495784 | 6.11122417105388  | 2.92155147280227  |
| C | 17.57375291616796 | 7.76704611789120  | 2.17607230988785  |
| C | 18.65812826689147 | 8.61513818062033  | 1.78693079391104  |
| H | 19.66753926185009 | 8.26116171997675  | 1.94511522066201  |
| C | 18.42902889886554 | 9.83336010911569  | 1.23211191661205  |
| H | 19.25189224308815 | 10.47066076857241 | 0.93896319235960  |
| C | 17.09611062919482 | 10.30823518027322 | 1.02139679759274  |
| C | 16.78951139478096 | 11.56042199478323 | 0.45603661246159  |
| H | 17.59154956998953 | 12.22037149204352 | 0.15388932190068  |
| C | 15.47388796784952 | 11.92896373384948 | 0.29576629219153  |
| H | 15.20549013508119 | 12.88249369649699 | -0.13357823607352 |
| C | 14.45805535543072 | 11.05628008438268 | 0.69631123192477  |
| H | 13.42047497651334 | 11.32797144675562 | 0.57875633765056  |
| C | 16.01632075234569 | 9.49137234048436  | 1.39717786051310  |
| C | 16.25644300800531 | 8.21383167435735  | 1.97706956994113  |
| C | 13.89412370713185 | 10.26971913130362 | 4.52603686133274  |
| H | 14.51487401495426 | 11.01631516987925 | 4.06494306179859  |
| C | 13.48299261441130 | 10.16045406540350 | 5.82563742183044  |
| H | 13.66983317245683 | 10.77421140792869 | 6.68744736745899  |
| C | 12.65418936741197 | 8.47938269065378  | 4.67572422254118  |
| C | 12.02049122023091 | 7.30867850515478  | 4.14695407723365  |
| C | 11.52739382601162 | 5.90168366722048  | 2.55277896691309  |
| H | 11.52362175067603 | 5.47483759136406  | 1.56624445926539  |
| C | 10.90362547399969 | 5.47024187125888  | 3.69094494171935  |
| H | 10.27115093390264 | 4.62277661088148  | 3.88108478879736  |

[Cr(phen)<sub>2</sub>(Hbiim)]<sup>2+</sup>

|    |                  |                  |                  |
|----|------------------|------------------|------------------|
| Cr | 5.19671338284875 | 3.26883000378374 | 3.22290211014426 |
| N  | 4.92347274975093 | 1.30999984552485 | 3.84495337564951 |
| N  | 6.17929404127130 | 2.28357369147123 | 1.69290924340993 |
| N  | 4.35479163772777 | 4.10560302747063 | 4.91525837475380 |
| N  | 6.91133310108650 | 3.53115331228581 | 4.37581059518318 |

|   |                  |                   |                   |
|---|------------------|-------------------|-------------------|
| N | 5.37176381383366 | 5.11002641906732  | 2.36856341570322  |
| N | 3.47642227145019 | 3.29983664146817  | 2.19181084178134  |
| N | 4.47126038341536 | 6.65478435061743  | 1.10947217209872  |
| H | 3.81619217654845 | 7.12959890834676  | 0.50695745121125  |
| N | 2.10164084807460 | 4.48044349333245  | 0.84702749200558  |
| C | 6.78847671020184 | 2.80676367963847  | 0.63659258968591  |
| H | 6.81095253084053 | 3.88407185532232  | 0.56985219686620  |
| C | 7.37874375821003 | 2.00706837935564  | -0.34709711065848 |
| H | 7.86470570531994 | 2.48088492690976  | -1.18670079986089 |
| C | 7.33017191820995 | 0.63709818171356  | -0.22867266475140 |
| H | 7.78026522671411 | -0.00048426495665 | -0.97760759972872 |
| C | 6.68532253318721 | 0.05716321226871  | 0.88026648892763  |
| C | 6.57729461752349 | -1.35342595423481 | 1.09418444105754  |
| H | 7.01580751126206 | -2.01772880200557 | 0.36237322084846  |
| C | 5.93993302795498 | -1.84829644096031 | 2.18652416669986  |
| H | 5.86039504787103 | -2.91522937682452 | 2.34329080085104  |
| C | 5.35657980583694 | -0.97533496926235 | 3.15891460143527  |
| C | 4.68083088054507 | -1.42261720319090 | 4.30991981193888  |
| H | 4.58395092529903 | -2.48421929702253 | 4.49304074262613  |
| C | 4.15275540697943 | -0.50369764630882 | 5.18695431682074  |
| H | 3.62928365876593 | -0.81498259180481 | 6.07839608152026  |
| C | 4.29246066915479 | 0.86258929959350  | 4.92293518764920  |
| H | 3.88474511317172 | 1.60029167502856  | 5.59720882333790  |
| C | 5.45160347514106 | 0.41408125004638  | 2.96953906862429  |
| C | 6.12010177947174 | 0.93251642319811  | 1.82338076194830  |
| C | 3.07615067291597 | 4.37906353524352  | 5.14195109449985  |
| H | 2.37495658999690 | 4.10618087445132  | 4.36778901374513  |
| C | 2.64966291880157 | 4.98654414521567  | 6.32743049367494  |
| H | 1.59754548112334 | 5.18496204657510  | 6.46597686455073  |
| C | 3.57333508122992 | 5.32039096478011  | 7.29083583287031  |
| H | 3.26603972579661 | 5.79198328902875  | 8.21458195779340  |
| C | 4.93672845948833 | 5.04617031872320  | 7.07166504494776  |
| C | 5.97429111164343 | 5.35856866096454  | 8.00590244174019  |
| H | 5.69856102485599 | 5.83115420040861  | 8.93867351066019  |
| C | 7.27293979836300 | 5.07201255004994  | 7.73060101472819  |

|   |                   |                  |                  |
|---|-------------------|------------------|------------------|
| H | 8.05343586472023  | 5.31245263421986 | 8.43934494043984 |
| C | 7.64496151354292  | 4.44609266608557 | 6.49882628796565 |
| C | 8.97078584831029  | 4.12590880855508 | 6.15061973214382 |
| H | 9.77351049346321  | 4.35702415498781 | 6.83787535727395 |
| C | 9.22812481820001  | 3.52368665009139 | 4.94099184577042 |
| H | 10.23372582878034 | 3.26568999811955 | 4.64461847278413 |
| C | 8.16908663638528  | 3.23822047243860 | 4.07302391857453 |
| H | 8.34761612374446  | 2.76738131216230 | 3.11823149688546 |
| C | 6.64160023302489  | 4.12588396650775 | 5.56806831241897 |
| C | 5.27995593011715  | 4.43046757246170 | 5.85588520827503 |
| C | 6.23292022366514  | 6.18601061454809 | 2.33869119341342 |
| H | 7.16745074560977  | 6.18583830770596 | 2.87000279718000 |
| C | 5.68142555047012  | 7.15462074407971 | 1.55374857011091 |
| H | 6.02915601048999  | 8.13181997620907 | 1.27420955491130 |
| C | 4.30851410911423  | 5.42432721493318 | 1.61527980778927 |
| C | 3.25621634537874  | 4.45627095492433 | 1.49868778495775 |
| C | 1.53708663290269  | 3.26305801488314 | 1.13175823988579 |
| H | 0.57540923813681  | 2.97928559020574 | 0.73653914491894 |
| C | 2.37335067652728  | 2.53170245718495 | 1.95517112151253 |
| H | 2.25819160553273  | 1.54726527438319 | 2.37515874579852 |

[Cr(phen)<sub>2</sub>(biim)]<sup>+</sup>

|    |                   |                   |                   |
|----|-------------------|-------------------|-------------------|
| Cr | 1.58532413880107  | 0.87653104688773  | 7.96021250911689  |
| N  | 2.15721311451817  | 2.22673960232797  | 9.42304515025510  |
| N  | -0.62271007607044 | -1.36503923350943 | 10.54395326089676 |
| N  | -0.35271790679862 | 1.33567272875350  | 8.07941069133575  |
| N  | 1.94159613635161  | 2.18140424300079  | 6.36531365684591  |
| N  | 3.61897643453076  | 0.40707573394708  | 8.11399645521107  |
| N  | -2.34827939479064 | 0.87136369972341  | 9.01075633964135  |
| N  | 1.04813803767815  | -0.46890985865698 | 9.33212172437231  |
| N  | 1.24200713321243  | -0.39997048980287 | 6.36572761077782  |
| C  | 1.68643512122529  | 1.56331552552632  | 2.71725349586611  |
| H  | 1.81335228752174  | 2.09965010013357  | 1.78685520835405  |
| C  | -1.05918066550852 | 0.55965663439484  | 8.95556284094314  |
| C  | 0.62905951301459  | -2.41395658735477 | 5.25043473984467  |

|   |                   |                   |                   |
|---|-------------------|-------------------|-------------------|
| H | 0.33512758493697  | -3.44906742455493 | 5.33946559555189  |
| C | 6.18098753844518  | 1.78292301806138  | 10.41640159973652 |
| H | 7.22816731327469  | 1.64587911136280  | 10.64869790148862 |
| C | 1.39355177461112  | 3.10428387671626  | 10.05970481898179 |
| H | 0.36086231742625  | 3.16166747918079  | 9.74936019981309  |
| C | 5.60483926408433  | 0.97658078229701  | 9.38407109538645  |
| C | 3.46335960562008  | 2.10539207777489  | 9.77351597508089  |
| C | 2.48154018810650  | 4.21249325557852  | 5.23802483299761  |
| H | 2.76987602357534  | 5.24944124550299  | 5.32358988971496  |
| C | 3.21873033021554  | 3.80934102509631  | 11.44698244601348 |
| H | 3.63000802621446  | 4.42643041539036  | 12.23451533981159 |
| C | 1.75360542207569  | 1.58424088510926  | 5.16003374866078  |
| C | 6.32101868928071  | 0.00993728555097  | 8.65299221194518  |
| H | 7.37034575202777  | -0.14804649366404 | 8.86256789292420  |
| C | 0.76400069758250  | -1.81274151080426 | 4.02028380588342  |
| H | 0.57877956078149  | -2.36543824526733 | 3.10906581833128  |
| C | 1.31569420762511  | 0.25679061273147  | 2.71892944718661  |
| H | 1.14062875522561  | -0.26856108284470 | 1.79007191698082  |
| C | -1.26816077385734 | 2.20076348788529  | 7.53763227266057  |
| H | -0.99577384439298 | 2.93780274559195  | 6.80153775734087  |
| C | -2.48457562716775 | 1.91029267262819  | 8.11443476451381  |
| H | -3.43769546384080 | 2.38268894801651  | 7.93805895298634  |
| C | 2.29263702427957  | 3.62185314833547  | 4.01009007724201  |
| H | 2.42852883908277  | 4.18437311015595  | 3.09621390960203  |
| C | 0.87682879224872  | -1.67418546169123 | 6.41171417535554  |
| H | 0.78288595471639  | -2.11528818993571 | 7.39268592430040  |
| C | 4.04886197667214  | 2.88300985437330  | 10.78736595844050 |
| C | 4.24391555825688  | 1.14084839029706  | 9.07094733042854  |
| C | 1.89627203353697  | 3.91639637985652  | 11.08242418522061 |
| H | 1.23500636886500  | 4.61624778016703  | 11.57098958740769 |
| C | 1.58696267076168  | -1.47916506122270 | 10.08625299151701 |
| H | 2.63288942506913  | -1.73121130112685 | 10.04438162169995 |
| C | 5.67567871632485  | -0.72139861339072 | 7.68306685785865  |
| H | 6.19632583383538  | -1.47020223020745 | 7.10518345460279  |
| C | 5.43462456755782  | 2.69505103488606  | 11.09119723197583 |



|   |                   |                   |                   |
|---|-------------------|-------------------|-------------------|
| H | 5.87460060225010  | 3.29902088249508  | 11.87287615933046 |
| C | -0.28102895872168 | -0.44540115774402 | 9.64957937474309  |
| C | 0.55718552695687  | -2.02180781166562 | 10.82274768809012 |
| H | 0.59711794113531  | -2.83511234092119 | 11.52959523524017 |
| C | 1.91517100464145  | 2.26750598755180  | 3.94203442879818  |
| C | 1.37388355881534  | 0.21003927637347  | 5.16037674075360  |
| C | 1.14736694398507  | -0.46019076580220 | 3.94582137731068  |
| C | 2.29498856290924  | 3.45860121082095  | 6.40182939442775  |
| H | 2.43410883994841  | 3.90066183963255  | 7.37707174422750  |
| C | 4.31616661147313  | -0.49697177786305 | 7.44021341504628  |
| H | 3.78839038986325  | -1.06410149608536 | 6.68805916892864  |

### References

- A4-1 a) F. Neese, *WIREs Comput. Mol. Sci.* 2012, **2**, 73-78; b) F. Neese, *WIREs Comput. Mol. Sci.* 2022, e1606.
- A4-2 J. Plasser, *J. Chem. Phys.* 2020, 084108.

**Table S1.**  $pK_a$  values for the two successive deprotonations of  $H_2biim$  bound in heteroleptic transition-metal complexes or a derivative.  $H_2bibzim$  is 2,2'-bibenzimidazole and  $H_2pybiim$  is 10-(1-H-imidazole-2-yl)-9H-pyreno[4,5-d]imidazole.

| Complex                        | Metal   | $pK_{a1}$ | $pK_{a2}$ | Reference |
|--------------------------------|---------|-----------|-----------|-----------|
| $H_2biim$                      | -       | 12.31     | 16.33     | 25        |
| $[Ru(bpy)_2(H_2biim)]^{2+}$    | Ru(II)  | 7.3       | 12        | 39        |
| $[ReCl_2(PPh_3)_2(H_2biim)]^+$ | Re(III) | 4.8       | 9.8       | 40        |
| $[Co(en)_2(H_2biim)]^{3+}$     | Co(III) | 5.9       | 9.9       | 41        |
| $[Ru(NH_3)_4(H_2biim)]^{2+}$   | Ru(II)  | 5.7       | -         | 42        |
| $[Ru(pap)_2(H_2biim)]^{2+}$    | Ru(II)  | 4.2       | 8.0       | 43        |
| $[Os(pap)_2(H_2biim)]^{2+}$    | Os(II)  | 3.8       | 6.5       | 43        |
| $[Mo(C_5H_5)_2(H_2biim)]^{2+}$ | Mo(IV)  | 4.81      | 9.61      | 44        |
| $[Ru(bpy)_2(H_2bibzim)]^{2+}$  | Ru(II)  | 5.7       | 10.1      | 45        |
| $[Os(bpy)_2(H_2bibzim)]^{2+}$  | Os(II)  | 5.08      | 9.59      | 46        |
| $[Ru(bpy)_2(H_2bibzim)]^{3+}$  | Ru(III) | 0.55      | 6.60      | 47        |
| $[Os(bpy)_2(H_2bibzim)]^{3+}$  | Os(III) | 1.55      | 6.40      | 46        |
| $[Ru(bpy)_2(H_2bibzim)]^{4+}$  | Ru(IV)  | <0        | <0        | 46        |
| $[Os(bpy)_2(H_2bibzim)]^{4+}$  | Os(IV)  | <0        | <0        | 46        |
| $[Ru(bpy)_2(H_2pybiim)]^{2+}$  | Ru(II)  | 5.09      | 8.95      | 47        |
| $[Os(bpy)_2(H_2pybiim)]^{2+}$  | Os(II)  | 4.52      | 7.97      | 47        |

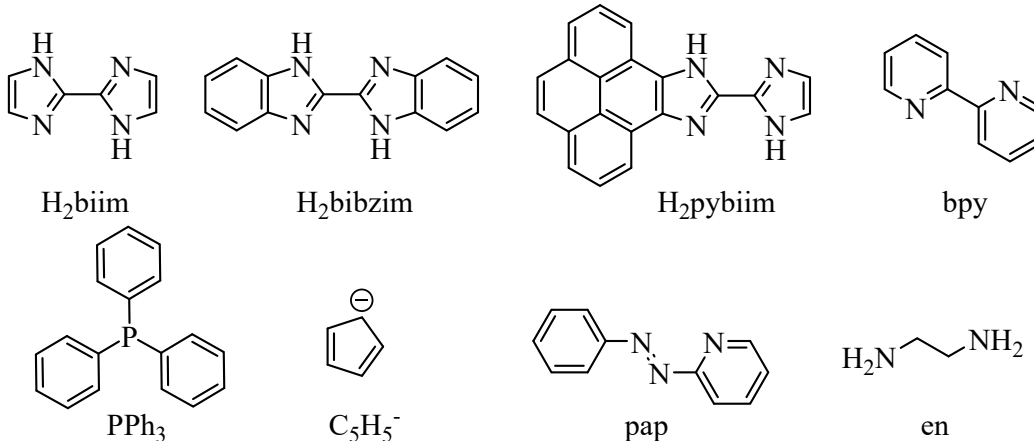

**Table S2.** Crystal data and structure refinement for [Cr(H<sub>2</sub>biim)<sub>3</sub>](NO<sub>3</sub>)<sub>3</sub> **1**.

|                                   |                                                                   |          |
|-----------------------------------|-------------------------------------------------------------------|----------|
| CCDC number                       | 2355642                                                           |          |
| Empirical formula                 | C <sub>18</sub> H <sub>18</sub> Cr N <sub>15</sub> O <sub>9</sub> |          |
| Formula weight                    | 640.47                                                            |          |
| Temperature                       | 120.00(10) K                                                      |          |
| Wavelength                        | 1.54184 Å                                                         |          |
| Crystal system                    | Trigonal                                                          |          |
| Space group                       | R 3 c                                                             |          |
| Unit cell dimensions              | a = 17.2169(3) Å                                                  | α = 90°  |
|                                   | b = 17.2169(3) Å                                                  | β = 90°  |
|                                   | c = 15.7297(4) Å                                                  | γ = 120° |
| Volume                            | 4037.95(17) Å <sup>3</sup>                                        |          |
| Z                                 | 6                                                                 |          |
| Density (calculated)              | 1.580 Mg/m <sup>3</sup>                                           |          |
| Absorption coefficient            | 4.199 mm <sup>-1</sup>                                            |          |
| F(000)                            | 1962                                                              |          |
| Crystal size                      | 0.604 x 0.063 x 0.047 mm <sup>3</sup>                             |          |
| Theta range for data collection   | 5.138 to 76.426°.                                                 |          |
| Index ranges                      | -21 ≤ h ≤ 21, -21 ≤ k ≤ 21, -19 ≤ l ≤ 12                          |          |
| Reflections collected             | 33096                                                             |          |
| Independent reflections           | 1612 [R(int) = 0.0531]                                            |          |
| Completeness to theta = 67.684°   | 99.9 %                                                            |          |
| Absorption correction             | Gaussian                                                          |          |
| Max. and min. transmission        | 1.000 and 0.289                                                   |          |
| Refinement method                 | Full-matrix least-squares on F <sup>2</sup>                       |          |
| Data / restraints / parameters    | 1612 / 1 / 131                                                    |          |
| Goodness-of-fit on F <sup>2</sup> | 1.126                                                             |          |
| Final R indices [I > 2σ(I)]       | R1 = 0.0502, wR2 = 0.1473                                         |          |
| R indices (all data)              | R1 = 0.0533, wR2 = 0.1500                                         |          |
| Absolute structure parameter      | 0.419(19)                                                         |          |
| Extinction coefficient            | n/a                                                               |          |
| Largest diff. peak and hole       | 0.648 and -0.451 e.Å <sup>-3</sup>                                |          |

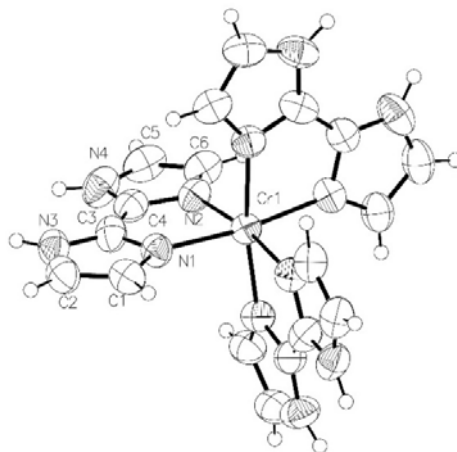

**Figure S1** ORTEP view of the complex  $[\text{Cr}(\text{H}_2\text{biim})_3]^{3+}$  in the crystal structure of  $[\text{Cr}(\text{H}_2\text{biim})_3](\text{NO}_3)_3$  (thermal ellipsoids are drawn at 50%).

Comments on the crystal structure of  $[\text{Cr}(\text{H}_2\text{biim})_3](\text{NO}_3)_3$

The structure is almost centrosymmetric and could be refined in the space group  $R\bar{3}c$ , at the expense of larger ellipsoids, especially for O2 and the position corresponding to N3/N4. The model in  $R\bar{3}c$  was then preferred. The Flack parameter refined to 0.42(2) which differs enough from 0.5 to privilege this twinned model. The space group contains an element of the second kind so that the inversion twinning is anyway equivalent to an orientation ambiguity.

**Table S3.** Selected bond lengths (Å) and angles (°) for [Cr(H<sub>2</sub>biim)<sub>3</sub>](NO<sub>3</sub>)<sub>3</sub>.

---

|                     |            |
|---------------------|------------|
| Cr(1)-N(1)#1        | 2.031(6)   |
| Cr(1)-N(1)          | 2.031(6)   |
| Cr(1)-N(1)#2        | 2.031(6)   |
| Cr(1)-N(2)#1        | 2.024(7)   |
| Cr(1)-N(2)          | 2.024(7)   |
| Cr(1)-N(2)#2        | 2.024(7)   |
| <br>                |            |
| N(1)-Cr(1)-N(1)#2   | 94.5(2)    |
| N(1)#1-Cr(1)-N(1)   | 94.5(2)    |
| N(1)#1-Cr(1)-N(1)#2 | 94.5(2)    |
| N(2)-Cr(1)-N(1)#2   | 92.64(16)  |
| N(2)-Cr(1)-N(1)     | 80.41(18)  |
| N(2)#1-Cr(1)-N(1)#1 | 80.41(18)  |
| N(2)-Cr(1)-N(1)#1   | 171.54(17) |
| N(2)#1-Cr(1)-N(1)   | 92.64(16)  |
| N(2)#2-Cr(1)-N(1)   | 171.54(17) |
| N(2)#2-Cr(1)-N(1)#2 | 80.41(18)  |
| N(2)#2-Cr(1)-N(1)#1 | 92.64(16)  |
| N(2)#1-Cr(1)-N(1)#2 | 171.54(17) |
| N(2)#2-Cr(1)-N(2)   | 93.0(3)    |
| N(2)#1-Cr(1)-N(2)   | 93.0(3)    |
| N(2)#1-Cr(1)-N(2)#2 | 93.0(3)    |

---

Symmetry transformations used to generate equivalent atoms: #1 -y+1,x-y,z #2 -x+y+1,-x+1,z

**Table S4.** Crystal data and structure refinement for [Cr(Hbiim)<sub>3</sub>] **2**.

|                                   |                                                                    |           |
|-----------------------------------|--------------------------------------------------------------------|-----------|
| CCDC number                       | 2355643                                                            |           |
| Empirical formula                 | C <sub>28</sub> H <sub>55</sub> Cr N <sub>12</sub> O <sub>10</sub> |           |
| Formula weight                    | 771.84                                                             |           |
| Temperature                       | 100.00(11) K                                                       |           |
| Wavelength                        | 1.54184 Å                                                          |           |
| Crystal system                    | Trigonal                                                           |           |
| Space group                       | R -3                                                               |           |
| Unit cell dimensions              | a = 17.8046(3) Å                                                   | α = 90°.  |
|                                   | b = 17.8046(3) Å                                                   | β = 90°.  |
|                                   | c = 22.4548(4) Å                                                   | γ = 120°. |
| Volume                            | 6164.6(2) Å <sup>3</sup>                                           |           |
| Z                                 | 6                                                                  |           |
| Density (calculated)              | 1.247 Mg/m <sup>3</sup>                                            |           |
| Absorption coefficient            | 2.820 mm <sup>-1</sup>                                             |           |
| F(000)                            | 2466                                                               |           |
| Crystal size                      | 0.16 x 0.097 x 0.061 mm <sup>3</sup>                               |           |
| Theta range for data collection   | 3.477 to 74.981°.                                                  |           |
| Index ranges                      | -21 ≤ h ≤ 22, -21 ≤ k ≤ 21, -27 ≤ l ≤ 27                           |           |
| Reflections collected             | 19714                                                              |           |
| Independent reflections           | 2747 [R(int) = 0.0261]                                             |           |
| Completeness to theta = 67.684°   | 99.8 %                                                             |           |
| Absorption correction             | Analytical                                                         |           |
| Max. and min. transmission        | 0.861 and 0.743                                                    |           |
| Refinement method                 | Full-matrix least-squares on F <sup>2</sup>                        |           |
| Data / restraints / parameters    | 2747 / 0 / 94                                                      |           |
| Goodness-of-fit on F <sup>2</sup> | 1.067                                                              |           |
| Final R indices [I > 2σ(I)]       | R1 = 0.0758, wR2 = 0.2422                                          |           |
| R indices (all data)              | R1 = 0.0771, wR2 = 0.2440                                          |           |
| Extinction coefficient            | n/a                                                                |           |
| Largest diff. peak and hole       | 0.378 and -0.504 e.Å <sup>-3</sup>                                 |           |

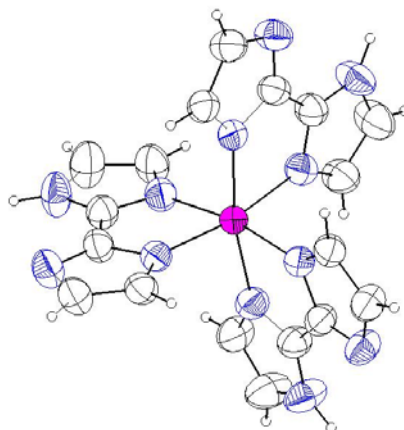

**Figure S2** Ortep view of [Cr(Hbiim)<sub>3</sub>] (thermal ellipsoids are drawn at 50%).

Comments on the crystal structure of [Cr(Hbiim)<sub>3</sub>]

The complex crystallizes in rhombohedral structure (R-3) with Cr atom located on the 3-fold axis. There are huge voids in the cell that are occupied by highly disordered solvent molecules. We used “squeeze” bypass program and refined the solvent-free structure. A solvent mask was calculated, and 1103 electrons were found in a volume of 3805Å<sup>3</sup> in 1 void per unit cell. This is consistent with the presence of 10[CH<sub>3</sub>OH] per Formula Unit which account for 1080 electrons per unit cell. The refinement drops down to less than 8% of *R* factors. The neutral Cr complexes are interconnected through hydrogen bonds.

**Table S5.** Hydrogen bonds for [Cr(Hbiim)<sub>3</sub>] [Å and °].

| D-H...A            | d(D-H) | d(H...A) | d(D...A) | <(DHA) |
|--------------------|--------|----------|----------|--------|
| N(4)-H(4)...N(2)#3 | 0.88   | 1.89     | 2.758(4) | 167.7  |

Symmetry transformations used to generate equivalent atoms:

#1 -y+1,x-y+1,z #2 -x+y,-x+1,z #3 -x+4/3,-y+5/3,-z+2/3

**Table S6.** Selected bond lengths [ $\text{\AA}$ ] and angles [ $^\circ$ ] for  $[\text{Cr}(\text{Hbiim})_3]$ .

|                     |            |
|---------------------|------------|
| Cr(1)-N(1)#1        | 2.036(2)   |
| Cr(1)-N(1)#2        | 2.036(2)   |
| Cr(1)-N(1)          | 2.036(2)   |
| Cr(1)-N(3)#1        | 2.047(2)   |
| Cr(1)-N(3)#2        | 2.047(2)   |
| Cr(1)-N(3)          | 2.047(3)   |
|                     |            |
| N(1)#1-Cr(1)-N(1)#2 | 93.74(9)   |
| N(1)#1-Cr(1)-N(1)   | 93.74(9)   |
| N(1)#2-Cr(1)-N(1)   | 93.74(9)   |
| N(1)#1-Cr(1)-N(3)   | 94.74(10)  |
| N(1)-Cr(1)-N(3)#2   | 94.74(10)  |
| N(1)-Cr(1)-N(3)     | 79.80(10)  |
| N(1)#2-Cr(1)-N(3)   | 169.65(9)  |
| N(1)#1-Cr(1)-N(3)#1 | 79.80(10)  |
| N(1)#2-Cr(1)-N(3)#2 | 79.80(10)  |
| N(1)#2-Cr(1)-N(3)#1 | 94.74(10)  |
| N(1)-Cr(1)-N(3)#1   | 169.65(10) |
| N(1)#1-Cr(1)-N(3)#2 | 169.65(10) |
| N(3)#1-Cr(1)-N(3)#2 | 92.59(10)  |
| N(3)#1-Cr(1)-N(3)   | 92.59(10)  |
| N(3)-Cr(1)-N(3)#2   | 92.59(10)  |

Symmetry transformations used to generate equivalent atoms: #1  $-y+1, x-y+1, z$  #2  $-x+y, -x+1, z$



**Table S7.** Crystal data and structure refinement for [Cr(Hbiim)<sub>2</sub>(biim)]PPh<sub>4</sub>(MeOH) **3**.

|                                   |                                                        |                  |
|-----------------------------------|--------------------------------------------------------|------------------|
| CCDC number                       | 2355644                                                |                  |
| Empirical formula                 | C <sub>43</sub> H <sub>38</sub> Cr N <sub>12</sub> O P |                  |
| Formula weight                    | 821.82                                                 |                  |
| Temperature                       | 100.00(13) K                                           |                  |
| Wavelength                        | 1.54184 Å                                              |                  |
| Crystal system                    | Monoclinic                                             |                  |
| Space group                       | <i>P</i> 2 <sub>1</sub> / <i>c</i>                     |                  |
| Unit cell dimensions              | a = 8.24157(6) Å                                       | α = 90°.         |
|                                   | b = 24.44046(17) Å                                     | β = 99.0717(6)°. |
|                                   | c = 20.22184(13) Å                                     | γ = 90°.         |
| Volume                            | 4022.29(5) Å <sup>3</sup>                              |                  |
| Z                                 | 4                                                      |                  |
| Density (calculated)              | 1.357 Mg/m <sup>3</sup>                                |                  |
| Absorption coefficient            | 3.128 mm <sup>-1</sup>                                 |                  |
| F(000)                            | 1708                                                   |                  |
| Crystal size                      | 0.2 x 0.13 x 0.13 mm <sup>3</sup>                      |                  |
| Theta range for data collection   | 2.858 to 74.667°.                                      |                  |
| Index ranges                      | -10 ≤ h ≤ 10, -27 ≤ k ≤ 30, -24 ≤ l ≤ 23               |                  |
| Reflections collected             | 38665                                                  |                  |
| Independent reflections           | 7991 [R(int) = 0.0225]                                 |                  |
| Completeness to theta = 67.684°   | 100.0 %                                                |                  |
| Absorption correction             | Analytical                                             |                  |
| Max. and min. transmission        | 0.753 and 0.643                                        |                  |
| Refinement method                 | Full-matrix least-squares on F <sup>2</sup>            |                  |
| Data / restraints / parameters    | 7991 / 0 / 525                                         |                  |
| Goodness-of-fit on F <sup>2</sup> | 1.036                                                  |                  |
| Final R indices [I > 2σ(I)]       | R1 = 0.0402, wR2 = 0.1114                              |                  |
| R indices (all data)              | R1 = 0.0416, wR2 = 0.1123                              |                  |
| Extinction coefficient            | n/a                                                    |                  |
| Largest diff. peak and hole       | 1.028 and -0.483 e.Å <sup>-3</sup>                     |                  |

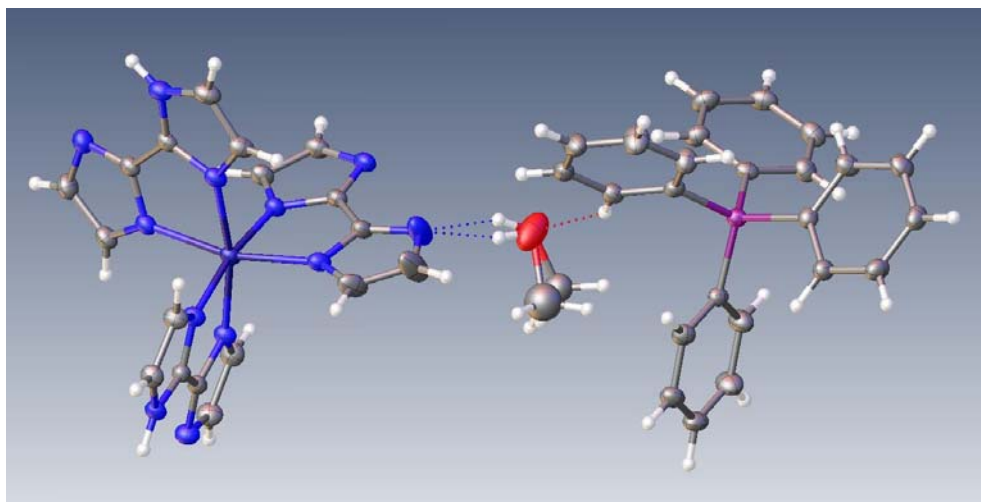

**Figure S3** View of the asymmetric unit of  $[\text{Cr}(\text{Hbiim})_2(\text{biim})]\text{PPh}_4(\text{MeOH})$  ( $T=100\text{K}$ ).

**Table S8.** Hydrogen bonds for  $[\text{Cr}(\text{Hbiim})_2(\text{biim})]\text{PPh}_4(\text{MeOH})$  [ $\text{\AA}$  and  $^\circ$ ].

| D-H...A               | d(D-H) | d(H...A) | d(D...A) | $\angle(\text{DHA})$ |
|-----------------------|--------|----------|----------|----------------------|
| N(8)-H(8)...N(4)#1    | 0.88   | 1.89     | 2.770(2) | 175.7                |
| N(12)-H(12)...N(10)#2 | 0.88   | 1.87     | 2.733(2) | 164.4                |
| C(6)-H(6)...N(6)#3    | 0.95   | 2.57     | 3.316(3) | 135.5                |
| C(20)-H(20)...O(1)    | 0.95   | 2.30     | 3.139(3) | 146.6                |
| O(1)-H(1A)...N(2)     | 0.84   | 1.96     | 2.784(3) | 166.6                |

Symmetry transformations used to generate equivalent atoms:

#1  $x, -y+1/2, z-1/2$  #2  $-x, -y, -z+1$  #3  $x, -y+1/2, z+1/2$

**Table S9.** Bond lengths [Å] and angles [°] for [Cr(Hbiim)<sub>2</sub>(biim)]PPh<sub>4</sub>(MeOH).

---

|                  |            |
|------------------|------------|
| Cr(1)-N(1)       | 2.0233(17) |
| Cr(1)-N(3)       | 2.0121(16) |
| Cr(1)-N(5)       | 2.0201(16) |
| Cr(1)-N(7)       | 2.0576(16) |
| Cr(1)-N(9)       | 2.0577(17) |
| Cr(1)-N(11)      | 2.0508(16) |
| <br>             |            |
| N(1)-Cr(1)-N(7)  | 94.70(7)   |
| N(1)-Cr(1)-N(9)  | 164.73(6)  |
| N(1)-Cr(1)-N(11) | 90.34(7)   |
| N(3)-Cr(1)-N(1)  | 79.92(7)   |
| N(3)-Cr(1)-N(5)  | 93.78(6)   |
| N(3)-Cr(1)-N(7)  | 170.97(7)  |
| N(3)-Cr(1)-N(9)  | 89.57(6)   |
| N(3)-Cr(1)-N(11) | 93.36(6)   |
| N(5)-Cr(1)-N(1)  | 100.52(7)  |
| N(5)-Cr(1)-N(7)  | 79.98(6)   |
| N(5)-Cr(1)-N(9)  | 91.13(6)   |
| N(5)-Cr(1)-N(11) | 167.90(7)  |
| N(7)-Cr(1)-N(9)  | 97.03(6)   |
| N(11)-Cr(1)-N(7) | 93.93(6)   |
| N(11)-Cr(1)-N(9) | 79.16(6)   |

---

**Table S10.** Crystal data and structure refinement for [Cr(Hbiim)<sub>2</sub>(biim)]PPh<sub>4</sub> **4**.

|                                   |                                                      |                 |
|-----------------------------------|------------------------------------------------------|-----------------|
| CCDC number                       | 2355645                                              |                 |
| Empirical formula                 | C <sub>42</sub> H <sub>34</sub> Cr N <sub>12</sub> P |                 |
| Formula weight                    | 789.78                                               |                 |
| Temperature                       | 286(6) K                                             |                 |
| Wavelength                        | 1.54184 Å                                            |                 |
| Crystal system                    | Monoclinic                                           |                 |
| Space group                       | <i>P</i> 2 <sub>1</sub> / <i>n</i>                   |                 |
| Unit cell dimensions              | a = 8.11093(16) Å                                    | α = 90°.        |
|                                   | b = 25.0497(6) Å                                     | β = 99.692(2)°. |
|                                   | c = 19.6595(6) Å                                     | γ = 90°.        |
| Volume                            | 3937.33(17) Å <sup>3</sup>                           |                 |
| Z                                 | 4                                                    |                 |
| Density (calculated)              | 1.332 Mg/m <sup>3</sup>                              |                 |
| Absorption coefficient            | 3.155 mm <sup>-1</sup>                               |                 |
| F(000)                            | 1636                                                 |                 |
| Crystal size                      | 0.12 x 0.1 x 0.06 mm <sup>3</sup>                    |                 |
| Theta range for data collection   | 2.883 to 74.609°.                                    |                 |
| Index ranges                      | -9 ≤ h ≤ 7, -30 ≤ k ≤ 30, -24 ≤ l ≤ 24               |                 |
| Reflections collected             | 37800                                                |                 |
| Independent reflections           | 7738 [R(int) = 0.0364]                               |                 |
| Completeness to theta = 67.684°   | 99.8 %                                               |                 |
| Absorption correction             | Analytical                                           |                 |
| Max. and min. transmission        | 0.853 and 0.773                                      |                 |
| Refinement method                 | Full-matrix least-squares on F <sup>2</sup>          |                 |
| Data / restraints / parameters    | 7738 / 0 / 505                                       |                 |
| Goodness-of-fit on F <sup>2</sup> | 1.159                                                |                 |
| Final R indices [I > 2σ(I)]       | R1 = 0.0657, wR2 = 0.1265                            |                 |
| R indices (all data)              | R1 = 0.0828, wR2 = 0.1342                            |                 |
| Extinction coefficient            | n/a                                                  |                 |
| Largest diff. peak and hole       | 0.411 and -0.365 e.Å <sup>-3</sup>                   |                 |

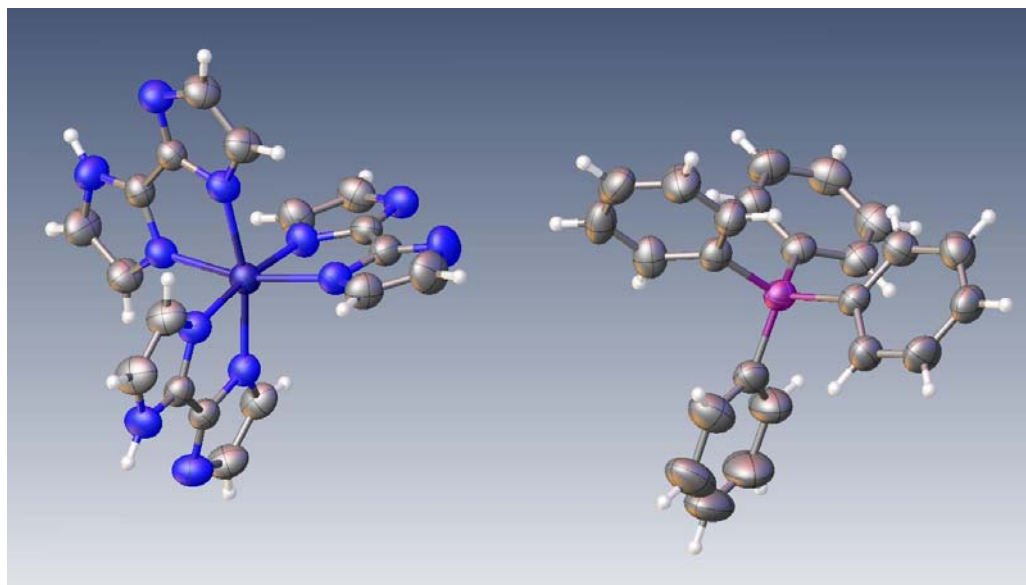

**Figure S4** Ortep view of the asymmetric unit of  $[\text{Cr}(\text{Hbiim})_2(\text{biim})]\text{PPh}_4$ .

**Table S11.** Hydrogen bonds for  $[\text{Cr}(\text{Hbiim})_2(\text{biim})]\text{PPh}_4$  [ $\text{\AA}$  and  $^\circ$ ].

| D-H...A              | d(D-H) | d(H...A) | d(D...A) | $\angle(\text{DHA})$ |
|----------------------|--------|----------|----------|----------------------|
| N(4)-H(4)...N(10)#1  | 0.86   | 1.91     | 2.744(4) | 163.6                |
| N(6)-H(6)...N(8)#2   | 0.86   | 1.88     | 2.730(4) | 168.7                |
| C(14)-H(14)...N(2)#3 | 0.93   | 2.49     | 3.237(5) | 137.9                |

Symmetry transformations used to generate equivalent atoms:

#1  $x-1/2, -y+3/2, z-1/2$  #2  $-x+1, -y+2, -z+1$  #3  $x+1/2, -y+3/2, z+1/2$

**Table S12.** Bond lengths [Å] and angles [°] for [Cr(Hbiim)<sub>2</sub>(biim)]PPh<sub>4</sub>.

---

|                  |            |
|------------------|------------|
| Cr(1)-N(1)       | 2.015(3)   |
| Cr(1)-N(3)       | 2.018(3)   |
| Cr(1)-N(5)       | 2.057(3)   |
| Cr(1)-N(7)       | 2.055(3)   |
| Cr(1)-N(9)       | 2.036(3)   |
| Cr(1)-N(11)      | 2.021(3)   |
| <br>             |            |
| N(1)-Cr(1)-N(3)  | 80.19(10)  |
| N(1)-Cr(1)-N(5)  | 90.56(10)  |
| N(1)-Cr(1)-N(7)  | 167.35(11) |
| N(1)-Cr(1)-N(9)  | 93.12(11)  |
| N(1)-Cr(1)-N(11) | 100.87(11) |
| N(3)-Cr(1)-N(5)  | 94.77(10)  |
| N(3)-Cr(1)-N(7)  | 93.27(10)  |
| N(3)-Cr(1)-N(9)  | 172.18(11) |
| N(3)-Cr(1)-N(11) | 97.55(11)  |
| N(7)-Cr(1)-N(5)  | 79.12(10)  |
| N(9)-Cr(1)-N(5)  | 89.30(10)  |
| N(9)-Cr(1)-N(7)  | 94.05(11)  |
| N(11)-Cr(1)-N(5) | 164.43(11) |
| N(11)-Cr(1)-N(7) | 90.68(11)  |
| N(11)-Cr(1)-N(9) | 79.63(11)  |

---

**Table S13.** Crystal data and structure refinement for  $[\text{Cr}(\text{Me}_2\text{biim})_2\text{Cl}_2]\text{Cl}(\text{MeOH})_3$  **5**.

|                                   |                                                                                  |                  |
|-----------------------------------|----------------------------------------------------------------------------------|------------------|
| CCDC number                       | 2355646                                                                          |                  |
| Empirical formula                 | C <sub>19</sub> H <sub>32</sub> Cl <sub>3</sub> Cr N <sub>8</sub> O <sub>3</sub> |                  |
| Formula weight                    | 578.87                                                                           |                  |
| Temperature                       | 120.00(10) K                                                                     |                  |
| Wavelength                        | 1.54184 Å                                                                        |                  |
| Crystal system                    | Triclinic                                                                        |                  |
| Space group                       | <i>P</i> -1                                                                      |                  |
| Unit cell dimensions              | a = 6.8363(2) Å                                                                  | α = 99.106(2)°.  |
|                                   | b = 13.7717(3) Å                                                                 | β = 95.598(2)°.  |
|                                   | c = 14.7817(3) Å                                                                 | γ = 104.370(2)°. |
| Volume                            | 1317.44(6) Å <sup>3</sup>                                                        |                  |
| Z                                 | 2                                                                                |                  |
| Density (calculated)              | 1.459 Mg/m <sup>3</sup>                                                          |                  |
| Absorption coefficient            | 6.686 mm <sup>-1</sup>                                                           |                  |
| F(000)                            | 602                                                                              |                  |
| Crystal size                      | 0.21 x 0.02 x 0.01 mm <sup>3</sup>                                               |                  |
| Theta range for data collection   | 3.059 to 75.776°.                                                                |                  |
| Index ranges                      | -5 ≤ h ≤ 8, -16 ≤ k ≤ 17, -18 ≤ l ≤ 18                                           |                  |
| Reflections collected             | 17103                                                                            |                  |
| Independent reflections           | 5256 [R(int) = 0.0617]                                                           |                  |
| Completeness to theta = 67.684°   | 99.5 %                                                                           |                  |
| Absorption correction             | Analytical                                                                       |                  |
| Max. and min. transmission        | 0.923 and 0.531                                                                  |                  |
| Refinement method                 | Full-matrix least-squares on F <sup>2</sup>                                      |                  |
| Data / restraints / parameters    | 5256 / 0 / 327                                                                   |                  |
| Goodness-of-fit on F <sup>2</sup> | 1.046                                                                            |                  |
| Final R indices [I > 2σ(I)]       | R1 = 0.0704, wR2 = 0.1859                                                        |                  |
| R indices (all data)              | R1 = 0.0840, wR2 = 0.1943                                                        |                  |
| Extinction coefficient            | n/a                                                                              |                  |
| Largest diff. peak and hole       | 1.132 and -0.807 e.Å <sup>-3</sup>                                               |                  |

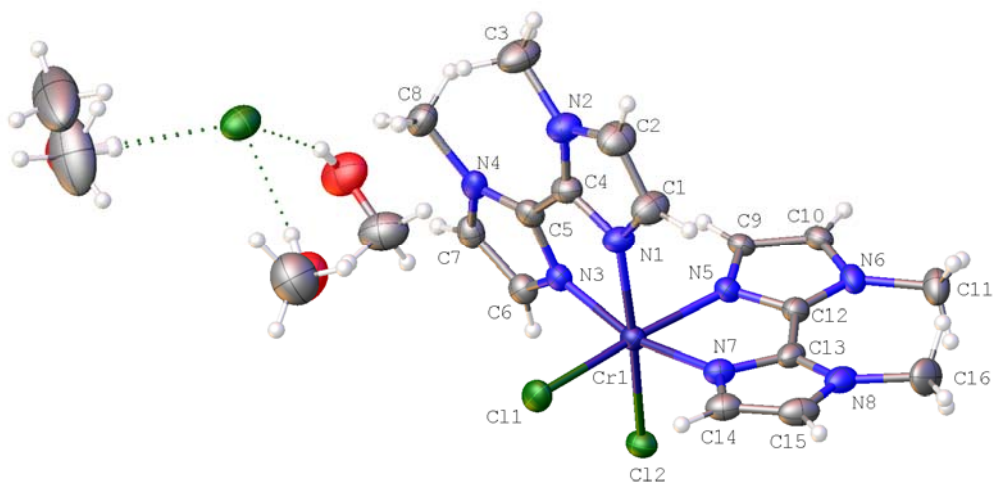

**Figure S5** Ortep view of the full asymmetric unit of  $[\text{Cr}(\text{Me}_2\text{biim})_2\text{Cl}_2]\text{Cl}(\text{MeOH})_3$  (thermal ellipsoids are drawn at 50% probability level).

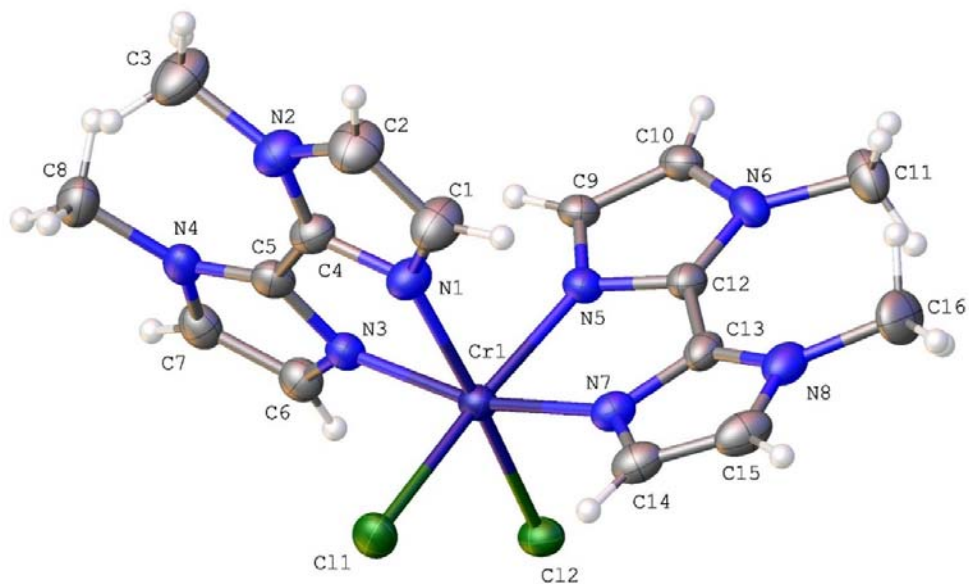

**Figure S6** Ortep view of  $[\text{Cr}(\text{Me}_2\text{biim})_2\text{Cl}_2]^+$  (thermal ellipsoids are drawn at 50% probability level) with numbering scheme. Solvent molecules and counter ion  $\text{Cl}^-$  are omitted.

**Table S14.** Hydrogen bonds for  $[\text{Cr}(\text{Me}_2\text{biim})_2\text{Cl}_2]\text{Cl}(\text{MeOH})_3$  [ $\text{\AA}$  and  $^\circ$ ].

| D-H...A             | d(D-H) | d(H...A) | d(D...A) | $\angle(\text{DHA})$ |
|---------------------|--------|----------|----------|----------------------|
| O(1)-H(1A)...Cl(3)  | 0.84   | 2.34     | 3.148(4) | 160.4                |
| O(2)-H(2A)...Cl(3)  | 0.84   | 2.29     | 3.124(5) | 171.5                |
| O(3)-H(3BB)...Cl(3) | 0.84   | 2.29     | 3.126(6) | 171.3                |



**Table S15.** Bond lengths [Å] and angles [°] for [Cr(Me<sub>2</sub>biim)<sub>2</sub>Cl<sub>2</sub>]Cl(MeOH)<sub>3</sub>.

---

|                   |            |
|-------------------|------------|
| Cr(1)-Cl(1)       | 2.3219(11) |
| Cr(1)-Cl(2)       | 2.3346(11) |
| Cr(1)-N(1)        | 2.025(4)   |
| Cr(1)-N(3)        | 2.054(3)   |
| Cr(1)-N(5)        | 2.043(3)   |
| Cr(1)-N(7)        | 2.038(3)   |
| <br>              |            |
| Cl(1)-Cr(1)-Cl(2) | 92.54(4)   |
| N(1)-Cr(1)-Cl(1)  | 89.68(11)  |
| N(1)-Cr(1)-Cl(2)  | 172.38(11) |
| N(1)-Cr(1)-N(3)   | 78.17(14)  |
| N(1)-Cr(1)-N(5)   | 88.51(14)  |
| N(1)-Cr(1)-N(7)   | 90.74(14)  |
| N(3)-Cr(1)-Cl(1)  | 95.24(10)  |
| N(3)-Cr(1)-Cl(2)  | 94.36(10)  |
| N(5)-Cr(1)-Cl(1)  | 171.68(10) |
| N(5)-Cr(1)-Cl(2)  | 90.31(10)  |
| N(5)-Cr(1)-N(3)   | 92.33(13)  |
| N(7)-Cr(1)-Cl(1)  | 93.99(10)  |
| N(7)-Cr(1)-Cl(2)  | 96.38(10)  |
| N(7)-Cr(1)-N(3)   | 165.50(14) |
| N(7)-Cr(1)-N(5)   | 77.92(14)  |

---

**Table S16.** Crystal data and structure refinement for [Cr(Me<sub>2</sub>biim)<sub>3</sub>](CF<sub>3</sub>SO<sub>3</sub>)<sub>3</sub> **6**.

|                                   |                                                                                                 |                 |
|-----------------------------------|-------------------------------------------------------------------------------------------------|-----------------|
| CCDC number                       | 2355647                                                                                         |                 |
| Empirical formula                 | C <sub>27</sub> H <sub>30</sub> Cr F <sub>9</sub> N <sub>12</sub> O <sub>9</sub> S <sub>3</sub> |                 |
| Formula weight                    | 985.81                                                                                          |                 |
| Temperature                       | 120.00(10) K                                                                                    |                 |
| Wavelength                        | 1.54184 Å                                                                                       |                 |
| Crystal system                    | Monoclinic                                                                                      |                 |
| Space group                       | <i>C</i> 2/ <i>c</i>                                                                            |                 |
| Unit cell dimensions              | a = 16.6274(3) Å                                                                                | α = 90°         |
|                                   | b = 19.7662(3) Å                                                                                | β = 108.113(2)° |
|                                   | c = 12.2436(2) Å                                                                                | γ = 90°         |
| Volume                            | 3824.58(13) Å <sup>3</sup>                                                                      |                 |
| Z                                 | 4                                                                                               |                 |
| Density (calculated)              | 1.712 Mg/m <sup>3</sup>                                                                         |                 |
| Absorption coefficient            | 5.015 mm <sup>-1</sup>                                                                          |                 |
| F(000)                            | 2004                                                                                            |                 |
| Crystal size                      | 0.339 x 0.173 x 0.095 mm <sup>3</sup>                                                           |                 |
| Theta range for data collection   | 3.581 to 73.162°.                                                                               |                 |
| Index ranges                      | -15 ≤ h ≤ 20, -23 ≤ k ≤ 24, -14 ≤ l ≤ 14                                                        |                 |
| Reflections collected             | 26988                                                                                           |                 |
| Independent reflections           | 3723 [R(int) = 0.0255]                                                                          |                 |
| Completeness to theta = 67.684°   | 100.0 %                                                                                         |                 |
| Absorption correction             | Gaussian                                                                                        |                 |
| Max. and min. transmission        | 1.000 and 0.126                                                                                 |                 |
| Refinement method                 | Full-matrix least-squares on F <sup>2</sup>                                                     |                 |
| Data / restraints / parameters    | 3723 / 0 / 306                                                                                  |                 |
| Goodness-of-fit on F <sup>2</sup> | 1.064                                                                                           |                 |
| Final R indices [I > 2σ(I)]       | R1 = 0.0302, wR2 = 0.0829                                                                       |                 |
| R indices (all data)              | R1 = 0.0311, wR2 = 0.0835                                                                       |                 |
| Extinction coefficient            | n/a                                                                                             |                 |
| Largest diff. peak and hole       | 0.357 and -0.500 e.Å <sup>-3</sup>                                                              |                 |

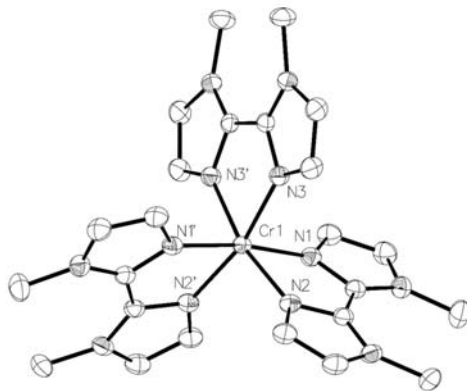

**Figure S7** ORTEP view of the complex  $[\text{Cr}(\text{Me}_2\text{biim})_3]^{3+}$  in the crystal structure of  $[\text{Cr}(\text{Me}_2\text{biim})_3](\text{CF}_3\text{SO}_3)_3$ . Hydrogen atoms and  $\text{CF}_3\text{SO}_3^-$  are omitted for clarity and thermal ellipsoids are drawn at 50% probability level.

**Table S17.** Selected bond lengths (Å) and angles (°) for  $[\text{Cr}(\text{Me}_2\text{biim})_3](\text{CF}_3\text{SO}_3)_3$ .

|                     |            |
|---------------------|------------|
| Cr(1)-N(1)#1        | 2.0242(14) |
| Cr(1)-N(1)          | 2.0242(14) |
| Cr(1)-N(2)#1        | 2.0207(14) |
| Cr(1)-N(2)          | 2.0207(13) |
| Cr(1)-N(3)          | 2.0304(14) |
| Cr(1)-N(3)#1        | 2.0304(14) |
| <hr/>               |            |
| N(1)#1-Cr(1)-N(1)   | 171.88(8)  |
| N(1)#1-Cr(1)-N(3)   | 92.70(5)   |
| N(1)#1-Cr(1)-N(3)#1 | 93.60(5)   |
| N(1)-Cr(1)-N(3)     | 93.60(5)   |
| N(1)-Cr(1)-N(3)#1   | 92.70(5)   |
| N(2)#1-Cr(1)-N(1)#1 | 78.51(5)   |
| N(2)#1-Cr(1)-N(1)   | 96.07(5)   |
| N(2)-Cr(1)-N(1)     | 78.51(5)   |
| N(2)-Cr(1)-N(1)#1   | 96.07(5)   |
| N(2)#1-Cr(1)-N(2)   | 97.45(8)   |
| N(2)#1-Cr(1)-N(3)#1 | 92.77(5)   |
| N(2)-Cr(1)-N(3)#1   | 167.14(5)  |
| N(2)#1-Cr(1)-N(3)   | 167.14(5)  |
| N(2)-Cr(1)-N(3)     | 92.77(5)   |
| N(3)#1-Cr(1)-N(3)   | 78.28(8)   |

Symmetry transformations used to generate equivalent atoms: #1 -x+1,y,-z+3/2

**Table S18.** Crystal data and structure refinement for [Cr(phen)<sub>2</sub>(H<sub>2</sub>biim)](CF<sub>3</sub>SO<sub>3</sub>)<sub>3</sub>(H<sub>2</sub>O)<sub>0.25</sub> **7**.

|                                   |                                                                                                      |                   |
|-----------------------------------|------------------------------------------------------------------------------------------------------|-------------------|
| CCDC number                       | 2355648                                                                                              |                   |
| Empirical formula                 | C <sub>33</sub> H <sub>22.50</sub> Cr F <sub>9</sub> N <sub>8</sub> O <sub>9.25</sub> S <sub>3</sub> |                   |
| Formula weight                    | 998.27                                                                                               |                   |
| Temperature                       | 109.99(10) K                                                                                         |                   |
| Wavelength                        | 1.54184 Å                                                                                            |                   |
| Crystal system                    | Monoclinic                                                                                           |                   |
| Space group                       | <i>P</i> 2 <sub>1</sub> / <i>c</i>                                                                   |                   |
| Unit cell dimensions              | a = 17.8506(3) Å                                                                                     | α = 90°.          |
|                                   | b = 17.2070(3) Å                                                                                     | β = 93.9394(14)°. |
|                                   | c = 12.78022(17) Å                                                                                   | γ = 90°.          |
| Volume                            | 3916.23(10) Å <sup>3</sup>                                                                           |                   |
| Z                                 | 4                                                                                                    |                   |
| Density (calculated)              | 1.693 Mg/m <sup>3</sup>                                                                              |                   |
| Absorption coefficient            | 4.889 mm <sup>-1</sup>                                                                               |                   |
| F(000)                            | 2014                                                                                                 |                   |
| Crystal size                      | 0.29 x 0.05 x 0.02 mm <sup>3</sup>                                                                   |                   |
| Theta range for data collection   | 2.481 to 75.422°.                                                                                    |                   |
| Index ranges                      | -21 ≤ h ≤ 22, -19 ≤ k ≤ 21, -14 ≤ l ≤ 15                                                             |                   |
| Reflections collected             | 34192                                                                                                |                   |
| Independent reflections           | 7876 [R(int) = 0.0320]                                                                               |                   |
| Completeness to theta = 67.684°   | 100.0 %                                                                                              |                   |
| Absorption correction             | Analytical                                                                                           |                   |
| Max. and min. transmission        | 0.928 and 0.470                                                                                      |                   |
| Refinement method                 | Full-matrix least-squares on F <sup>2</sup>                                                          |                   |
| Data / restraints / parameters    | 7876 / 0 / 584                                                                                       |                   |
| Goodness-of-fit on F <sup>2</sup> | 1.057                                                                                                |                   |
| Final R indices [I > 2σ(I)]       | R <sub>1</sub> = 0.0720, wR <sub>2</sub> = 0.1882                                                    |                   |
| R indices (all data)              | R <sub>1</sub> = 0.0824, wR <sub>2</sub> = 0.1952                                                    |                   |
| Extinction coefficient            | n/a                                                                                                  |                   |
| Largest diff. peak and hole       | 1.215 and -0.874 e.Å <sup>-3</sup>                                                                   |                   |

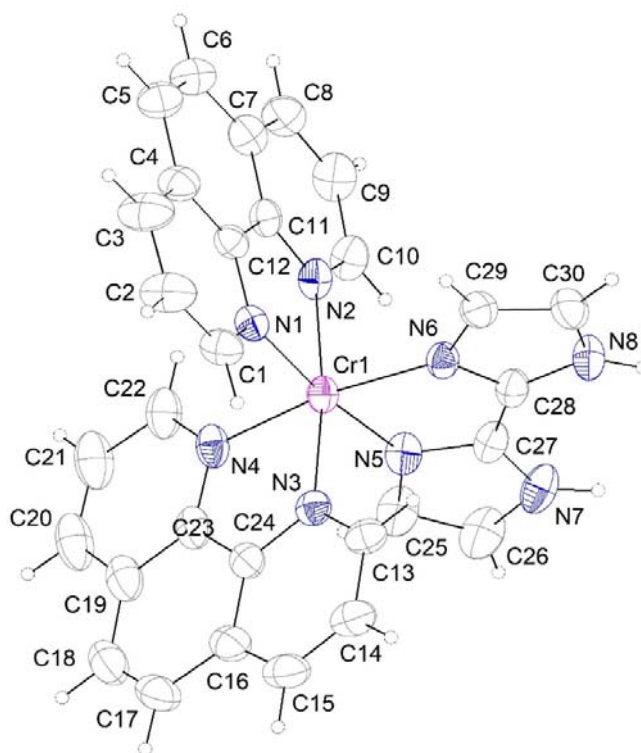

**Figure S8** Ortep view of  $[\text{Cr}(\text{phen})_2(\text{H}_2\text{biim})](\text{CF}_3\text{SO}_3)_3(\text{H}_2\text{O})_{0.25}$  (thermal ellipsoids are drawn at 50% probability level) with numbering scheme. Triflate counter ions are omitted for clarity.

Comments on the crystal structure of  $[\text{Cr}(\text{phen})_2(\text{H}_2\text{biim})](\text{CF}_3\text{SO}_3)_3 \cdot (\text{H}_2\text{O})_{0.25}$ .

This Cr-complex was recrystallized in acetonitrile. We found a disordered water molecule in the crystal structure (site occupancy  $\sim 0.25$ ) making hydrogen bond with a N-H of the complex.

**Table S19.** Hydrogen bonds for  $[\text{Cr}(\text{phen})_2(\text{H}_2\text{biim})](\text{CF}_3\text{SO}_3)_3(\text{H}_2\text{O})_{0.25}$  [ $\text{\AA}$  and  $^\circ$ ].

| D-H...A           | d(D-H) | d(H...A) | d(D...A)  | $\angle(\text{DHA})$ |
|-------------------|--------|----------|-----------|----------------------|
| N(7)-H(7)...O(9)  | 0.88   | 2.11     | 2.798(5)  | 134.6                |
| N(7)-H(7)...O(11) | 0.88   | 1.89     | 2.651(13) | 143.3                |
| N(8)-H(8)...O(1)  | 0.88   | 2.58     | 3.105(5)  | 119.5                |
| N(8)-H(8)...O(2)  | 0.88   | 1.89     | 2.753(5)  | 168.6                |

**Table S20.** Selected bond lengths [Å] and angles [°] for [Cr(phen)<sub>2</sub>(H<sub>2</sub>biim)](CF<sub>3</sub>SO<sub>3</sub>)<sub>3</sub>(H<sub>2</sub>O)<sub>0.25</sub>.

---

|                 |            |
|-----------------|------------|
| Cr(1)-N(1)      | 2.051(3)   |
| Cr(1)-N(2)      | 2.057(3)   |
| Cr(1)-N(3)      | 2.053(3)   |
| Cr(1)-N(4)      | 2.054(3)   |
| Cr(1)-N(5)      | 2.029(3)   |
| Cr(1)-N(6)      | 2.019(3)   |
|                 |            |
| N(1)-Cr(1)-N(2) | 80.79(13)  |
| N(1)-Cr(1)-N(3) | 94.52(13)  |
| N(1)-Cr(1)-N(4) | 95.16(13)  |
| N(3)-Cr(1)-N(2) | 172.89(13) |
| N(3)-Cr(1)-N(4) | 81.05(14)  |
| N(4)-Cr(1)-N(2) | 93.99(14)  |
| N(5)-Cr(1)-N(1) | 173.47(14) |
| N(5)-Cr(1)-N(2) | 95.29(14)  |
| N(5)-Cr(1)-N(3) | 89.86(14)  |
| N(5)-Cr(1)-N(4) | 90.30(14)  |
| N(6)-Cr(1)-N(1) | 94.03(13)  |
| N(6)-Cr(1)-N(2) | 90.53(13)  |
| N(6)-Cr(1)-N(3) | 95.15(13)  |
| N(6)-Cr(1)-N(4) | 170.31(13) |
| N(6)-Cr(1)-N(5) | 80.74(13)  |

---

**Table S21.** Crystal data and structure refinement for [Cr(phen)<sub>2</sub>(Hbiim)](CF<sub>3</sub>SO<sub>3</sub>)<sub>2</sub>(H<sub>2</sub>O)<sub>0.5</sub> **8**.

|                                   |                                                                                                   |                 |
|-----------------------------------|---------------------------------------------------------------------------------------------------|-----------------|
| CCDC number                       | 2355649                                                                                           |                 |
| Empirical formula                 | C <sub>32</sub> H <sub>22</sub> Cr F <sub>6</sub> N <sub>8</sub> O <sub>6.50</sub> S <sub>2</sub> |                 |
| Formula weight                    | 852.69                                                                                            |                 |
| Temperature                       | 120.00(10) K                                                                                      |                 |
| Wavelength                        | 1.54184 Å                                                                                         |                 |
| Crystal system                    | Triclinic                                                                                         |                 |
| Space group                       | <i>P</i> -1                                                                                       |                 |
| Unit cell dimensions              | a = 10.6371(4) Å                                                                                  | α = 79.588(3)°. |
|                                   | b = 13.6703(5) Å                                                                                  | β = 68.575(4)°. |
|                                   | c = 14.0130(6) Å                                                                                  | γ = 68.511(3)°. |
| Volume                            | 1762.42(13) Å <sup>3</sup>                                                                        |                 |
| Z                                 | 2                                                                                                 |                 |
| Density (calculated)              | 1.607 Mg/m <sup>3</sup>                                                                           |                 |
| Absorption coefficient            | 4.594 mm <sup>-1</sup>                                                                            |                 |
| F(000)                            | 864                                                                                               |                 |
| Crystal size                      | 0.16 x 0.05 x 0.02 mm <sup>3</sup>                                                                |                 |
| Theta range for data collection   | 3.393 to 76.272°.                                                                                 |                 |
| Index ranges                      | -13 ≤ h ≤ 12, -16 ≤ k ≤ 16, -17 ≤ l ≤ 17                                                          |                 |
| Reflections collected             | 43826                                                                                             |                 |
| Independent reflections           | 7102 [R(int) = 0.0623]                                                                            |                 |
| Completeness to theta = 67.684°   | 99.9 %                                                                                            |                 |
| Absorption correction             | Analytical                                                                                        |                 |
| Max. and min. transmission        | 0.904 and 0.609                                                                                   |                 |
| Refinement method                 | Full-matrix least-squares on F <sup>2</sup>                                                       |                 |
| Data / restraints / parameters    | 7102 / 0 / 545                                                                                    |                 |
| Goodness-of-fit on F <sup>2</sup> | 1.074                                                                                             |                 |
| Final R indices [I > 2σ(I)]       | R1 = 0.0544, wR2 = 0.1486                                                                         |                 |
| R indices (all data)              | R1 = 0.0651, wR2 = 0.1574                                                                         |                 |
| Extinction coefficient            | n/a                                                                                               |                 |
| Largest diff. peak and hole       | 0.655 and -0.712 e.Å <sup>-3</sup>                                                                |                 |

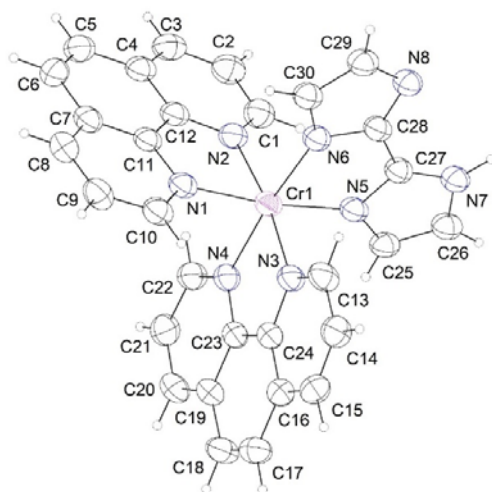

**Figure S9** Ortep view of  $[\text{Cr}(\text{phen})_2(\text{Hbiim})](\text{CF}_3\text{SO}_3)_2(\text{H}_2\text{O})_{0.5}$  (thermal ellipsoids are drawn at 50% probability level) with numbering scheme. Triflate counter ions and water molecule are omitted for clarity purpose.

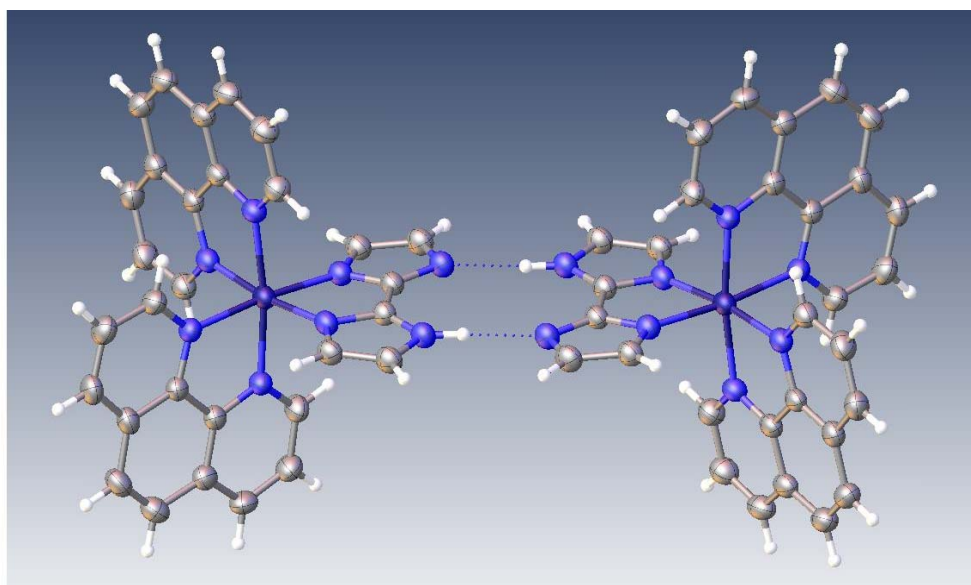

**Figure S10** Intermolecular H-bonds found in  $[\text{Cr}(\text{phen})_2(\text{Hbiim})](\text{CF}_3\text{SO}_3)_2(\text{H}_2\text{O})_{0.5}$ .

Comments on the crystal structure of  $[\text{Cr}(\text{phen})_2(\text{Hbiim})](\text{CF}_3\text{SO}_3)_2(\text{H}_2\text{O})_{0.5}$

There are 2  $\text{CF}_3\text{SO}_3^-$  in the asymmetric unit (in agreement with the protonation of the ligand and the valence state of the  $\text{Cr}^{3+}$ ). One  $\text{CF}_3\text{SO}_3^-$  is disordered onto 2 sites and modeled in two parts with refined occupancies 0.73/0.27. A water molecule is found close to this disordered triflate and was refined with occupancy fixed to 0.5. This water molecule could do hydrogen bond with the other ordered  $\text{CF}_3\text{SO}_3^-$  molecule. There are intermolecular hydrogen bonds between two complexes through  $\text{N-H}\cdots\text{N}$  bonds (see Table S22 and Figure S10).



**Table S22.** Hydrogen bonds for [Cr(phen)<sub>2</sub>(Hbiim)](CF<sub>3</sub>SO<sub>3</sub>)<sub>2</sub>(H<sub>2</sub>O)<sub>0.5</sub> [Å and °].

| D-H...A            | d(D-H) | d(H...A) | d(D...A) | <(DHA) |
|--------------------|--------|----------|----------|--------|
| N(7)-H(7)...N(8)#1 | 0.88   | 1.90     | 2.758(3) | 164.5  |

Symmetry transformations used to generate equivalent atoms: #1 -x,-y+1,-z

**Table S23.** Selected bond lengths [Å] and angles [°] for [Cr(phen)<sub>2</sub>(Hbiim)](CF<sub>3</sub>SO<sub>3</sub>)<sub>2</sub>(H<sub>2</sub>O)<sub>0.5</sub>.

|                 |           |
|-----------------|-----------|
| Cr(1)-N(1)      | 2.059(3)  |
| Cr(1)-N(2)      | 2.067(2)  |
| Cr(1)-N(3)      | 2.055(2)  |
| Cr(1)-N(4)      | 2.067(2)  |
| Cr(1)-N(5)      | 2.018(3)  |
| Cr(1)-N(6)      | 2.018(2)  |
|                 |           |
| N(1)-Cr(1)-N(2) | 80.70(10) |
| N(1)-Cr(1)-N(4) | 90.31(10) |
| N(3)-Cr(1)-N(1) | 94.11(10) |
| N(3)-Cr(1)-N(2) | 171.55(9) |
| N(3)-Cr(1)-N(4) | 80.67(9)  |
| N(4)-Cr(1)-N(2) | 92.64(9)  |
| N(5)-Cr(1)-N(1) | 172.33(9) |
| N(5)-Cr(1)-N(2) | 94.19(10) |
| N(5)-Cr(1)-N(3) | 91.61(10) |
| N(5)-Cr(1)-N(4) | 95.66(10) |
| N(5)-Cr(1)-N(6) | 80.64(10) |
| N(6)-Cr(1)-N(1) | 93.79(10) |
| N(6)-Cr(1)-N(2) | 92.34(9)  |
| N(6)-Cr(1)-N(3) | 94.66(9)  |
| N(6)-Cr(1)-N(4) | 174.01(9) |

**Table S24.** Crystal data and structure refinement for [Cr(phen)<sub>2</sub>(biim)]CF<sub>3</sub>SO<sub>3</sub>(CH<sub>3</sub>OH)<sub>1.5</sub> **9**.

|                                   |                                                                                                             |                  |
|-----------------------------------|-------------------------------------------------------------------------------------------------------------|------------------|
| CCDC number                       | 2355650                                                                                                     |                  |
| Empirical formula                 | C <sub>32.50</sub> H <sub>26</sub> Cr F <sub>3</sub> N <sub>8</sub> O <sub>4.50</sub> S                     |                  |
| Chemical formula moiety           | C <sub>30</sub> H <sub>20</sub> CrN <sub>8</sub> , CF <sub>3</sub> O <sub>3</sub> S, 1.5(CH <sub>4</sub> O) |                  |
| Formula weight                    | 741.67                                                                                                      |                  |
| Temperature                       | 150.00(10) K                                                                                                |                  |
| Wavelength                        | 1.54184 Å                                                                                                   |                  |
| Crystal system                    | Triclinic                                                                                                   |                  |
| Space group                       | <i>P</i> -1                                                                                                 |                  |
| Unit cell dimensions              | a = 11.7735(4) Å                                                                                            | α = 107.378(3)°. |
|                                   | b = 11.8329(4) Å                                                                                            | β = 98.544(3)°.  |
|                                   | c = 12.6821(4) Å                                                                                            | γ = 96.353(3)°.  |
| Volume                            | 1644.79(9) Å <sup>3</sup>                                                                                   |                  |
| Z                                 | 2                                                                                                           |                  |
| Density (calculated)              | 1.498 Mg/m <sup>3</sup>                                                                                     |                  |
| Absorption coefficient            | 4.068 mm <sup>-1</sup>                                                                                      |                  |
| F(000)                            | 760                                                                                                         |                  |
| Crystal size                      | 0.28 x 0.16 x 0.11 mm <sup>3</sup>                                                                          |                  |
| Theta range for data collection   | 3.721 to 70.623°.                                                                                           |                  |
| Index ranges                      | -14 ≤ h ≤ 13, -14 ≤ k ≤ 14, -15 ≤ l ≤ 15                                                                    |                  |
| Reflections collected             | 12239                                                                                                       |                  |
| Independent reflections           | 6162 [R(int) = 0.0311]                                                                                      |                  |
| Completeness to theta = 67.684°   | 99.8 %                                                                                                      |                  |
| Absorption correction             | Analytical                                                                                                  |                  |
| Max. and min. transmission        | 0.690 and 0.504                                                                                             |                  |
| Refinement method                 | Full-matrix least-squares on F <sup>2</sup>                                                                 |                  |
| Data / restraints / parameters    | 6162 / 0 / 454                                                                                              |                  |
| Goodness-of-fit on F <sup>2</sup> | 1.045                                                                                                       |                  |
| Final R indices [I > 2σ(I)]       | R1 = 0.0563, wR2 = 0.1698                                                                                   |                  |
| R indices (all data)              | R1 = 0.0603, wR2 = 0.1757                                                                                   |                  |
| Extinction coefficient            | n/a                                                                                                         |                  |
| Largest diff. peak and hole       | 1.616 and -0.623 e.Å <sup>-3</sup>                                                                          |                  |

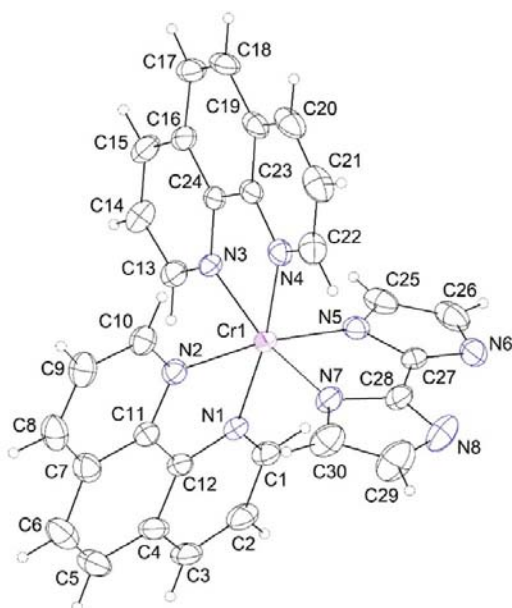

**Figure S11** Ortep view of  $[\text{Cr}(\text{phen})_2(\text{biim})]\text{CF}_3\text{SO}_3(\text{CH}_3\text{OH})_{1.5}$  (thermal ellipsoids are drawn at 50% probability level).

Comments on the crystal structure of  $[\text{Cr}(\text{phen})_2(\text{biim})]\text{CF}_3\text{SO}_3(\text{CH}_3\text{OH})_{1.5}$

Deprotonated complex crystallizes with one  $\text{CF}_3\text{SO}_3^-$  counterion and MeOH solvent molecules. One MeOH is fully ordered and makes H-bond with the  $\text{CF}_3\text{SO}_3^-$  ion (see Table S25). Another MeOH is disordered and refined with fixed 0.5 occupancy and with isotropic ADPs. The chemical formula moiety of the asymmetric unit is  $\text{C}_{30}\text{H}_{20}\text{CrN}_8$ ,  $\text{CF}_3\text{O}_3\text{S}$ ,  $1.5(\text{CH}_4\text{O})$ .

**Table S25.** Hydrogen bonds for  $[\text{Cr}(\text{phen})_2(\text{biim})]\text{CF}_3\text{SO}_3 \cdot (\text{CH}_3\text{OH})_{1.5}$  [ $\text{\AA}$  and  $^\circ$ ].

| D-H...A            | d(D-H) | d(H...A) | d(D...A) | $\angle(\text{DHA})$ |
|--------------------|--------|----------|----------|----------------------|
| O(2S)-H(2S)...O(1) | 0.84   | 2.25     | 2.951(6) | 141.1                |

**Table S26.** Selected bond lengths [Å] and angles [°] for [Cr(phen)<sub>2</sub>(biim)]CF<sub>3</sub>SO<sub>3</sub>(CH<sub>3</sub>OH)<sub>1.5</sub>.

---

|                 |            |
|-----------------|------------|
| Cr(1)-N(4)      | 2.067(3)   |
| Cr(1)-N(7)      | 1.993(3)   |
| Cr(1)-N(2)      | 2.069(2)   |
| Cr(1)-N(3)      | 2.086(2)   |
| Cr(1)-N(5)      | 2.000(2)   |
| Cr(1)-N(1)      | 2.063(2)   |
| <br>            |            |
| N(4)-Cr(1)-N(2) | 92.83(10)  |
| N(4)-Cr(1)-N(3) | 79.90(10)  |
| N(7)-Cr(1)-N(4) | 91.56(10)  |
| N(7)-Cr(1)-N(2) | 93.18(10)  |
| N(7)-Cr(1)-N(3) | 169.81(10) |
| N(7)-Cr(1)-N(5) | 81.42(10)  |
| N(7)-Cr(1)-N(1) | 92.61(10)  |
| N(2)-Cr(1)-N(3) | 92.79(9)   |
| N(5)-Cr(1)-N(4) | 94.30(10)  |
| N(5)-Cr(1)-N(2) | 171.16(10) |
| N(5)-Cr(1)-N(3) | 93.59(9)   |
| N(5)-Cr(1)-N(1) | 92.83(10)  |
| N(1)-Cr(1)-N(4) | 172.20(9)  |
| N(1)-Cr(1)-N(2) | 80.37(10)  |
| N(1)-Cr(1)-N(3) | 96.52(9)   |

---

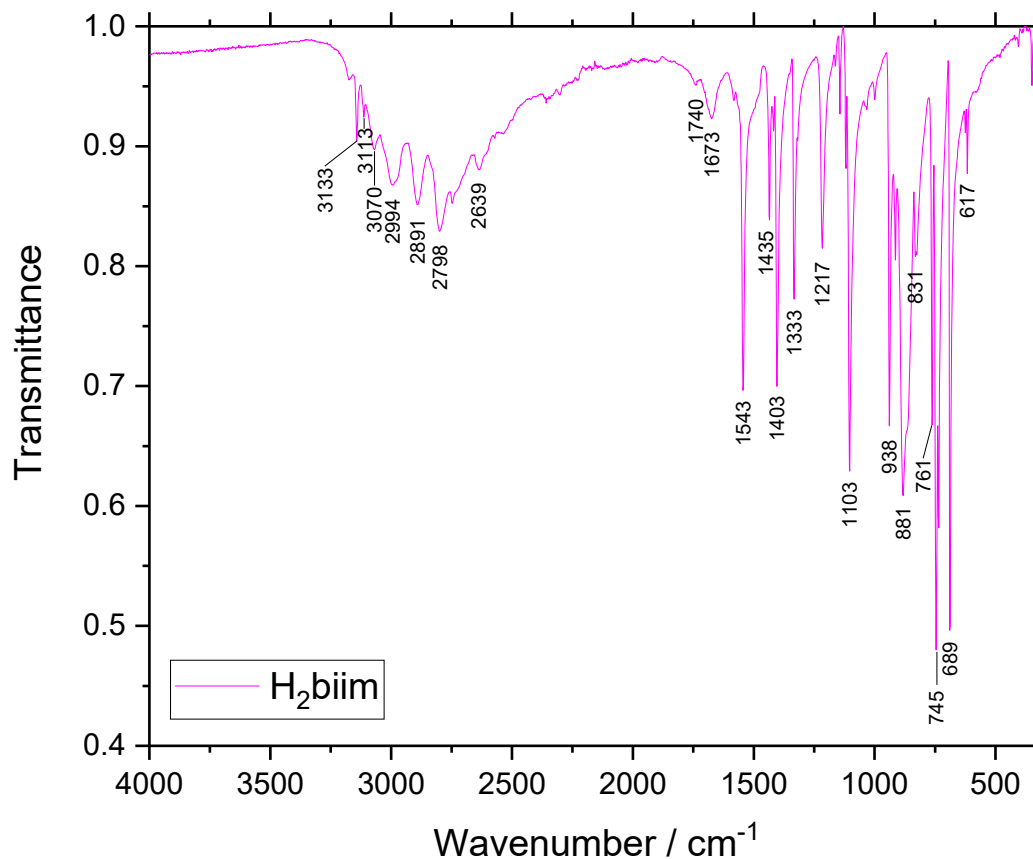

**Figure S12** FT-IR spectrum of the ligand H<sub>2</sub>biim in the solid state.

**Table S27** Observed IR peaks and their respective attribution based on literature.<sup>36</sup>

| Observed position of peaks / cm <sup>-1</sup> | Attribution          |
|-----------------------------------------------|----------------------|
| 3133; 3113                                    | $\nu$ C-H (aromatic) |
| 3400-2250 (large band)                        | $\nu$ N-H            |
| 1543; 1435; 1403; 1333; 914; 881; 689; 617    | Ring vibration       |
| 1216                                          | $\nu$ C2-C2'         |
| 1103; 939                                     | $\delta$ C,N-H       |
| 825                                           | $\gamma$ N-H         |
| 762; 746; 735                                 | $\gamma$ C-H         |

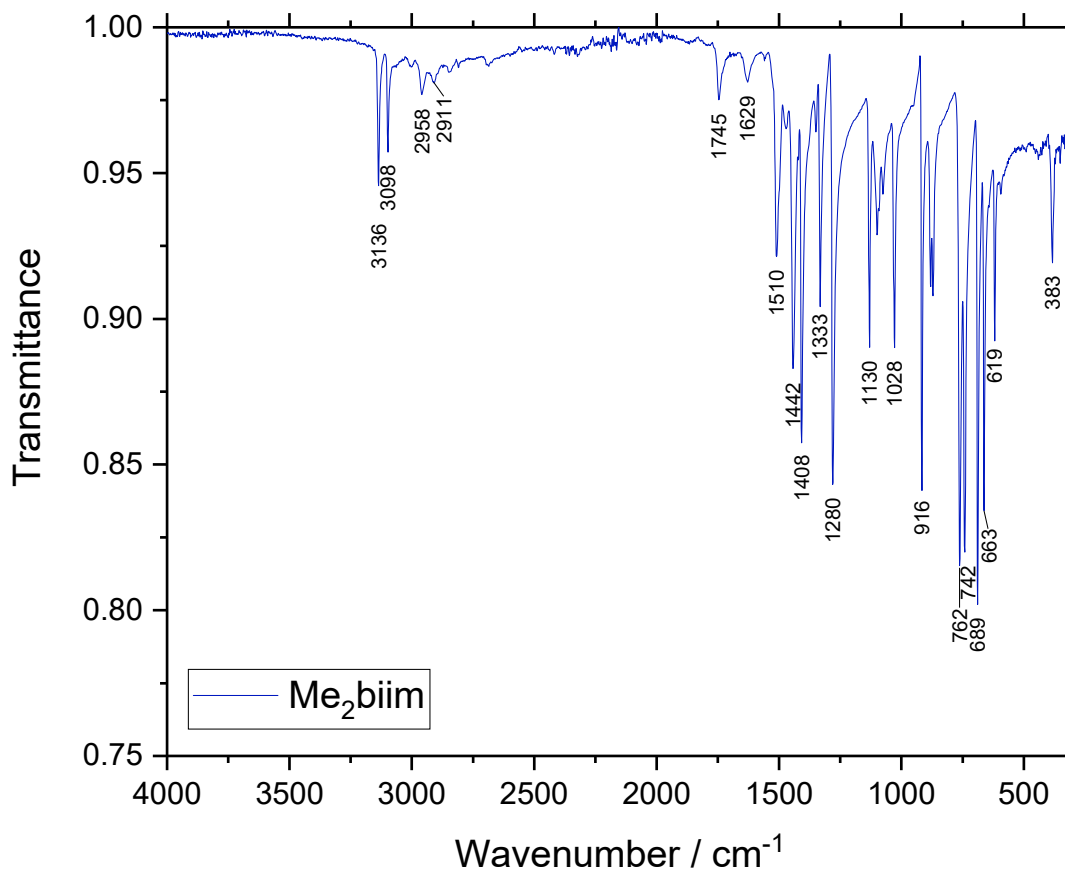

**Figure S13** FT-IR spectrum of the ligand Me<sub>2</sub>biim in the solid state.

**Table S28** Observed IR peaks and their respective attribution based on literature.<sup>36</sup>

| Observed position of peaks / cm <sup>-1</sup> | Attribution                   |
|-----------------------------------------------|-------------------------------|
| 3136; 3098                                    | $\nu$ C-H (aromatic)          |
| 3000; 2958; 2911                              | $\nu$ C-H (-CH <sub>3</sub> ) |
| 1745; 1629                                    | Harmonic                      |
| 1442; 1408                                    | $\delta$ CH <sub>3</sub>      |
| 1509; 1333; 1280; 916; 688; 663; 619          | R                             |
| 1130; 1099                                    | $\delta$ C-H                  |
| 1074; 1028                                    | $\rho$ CH <sub>3</sub>        |
| 762; 742                                      | $\gamma$ C-H                  |

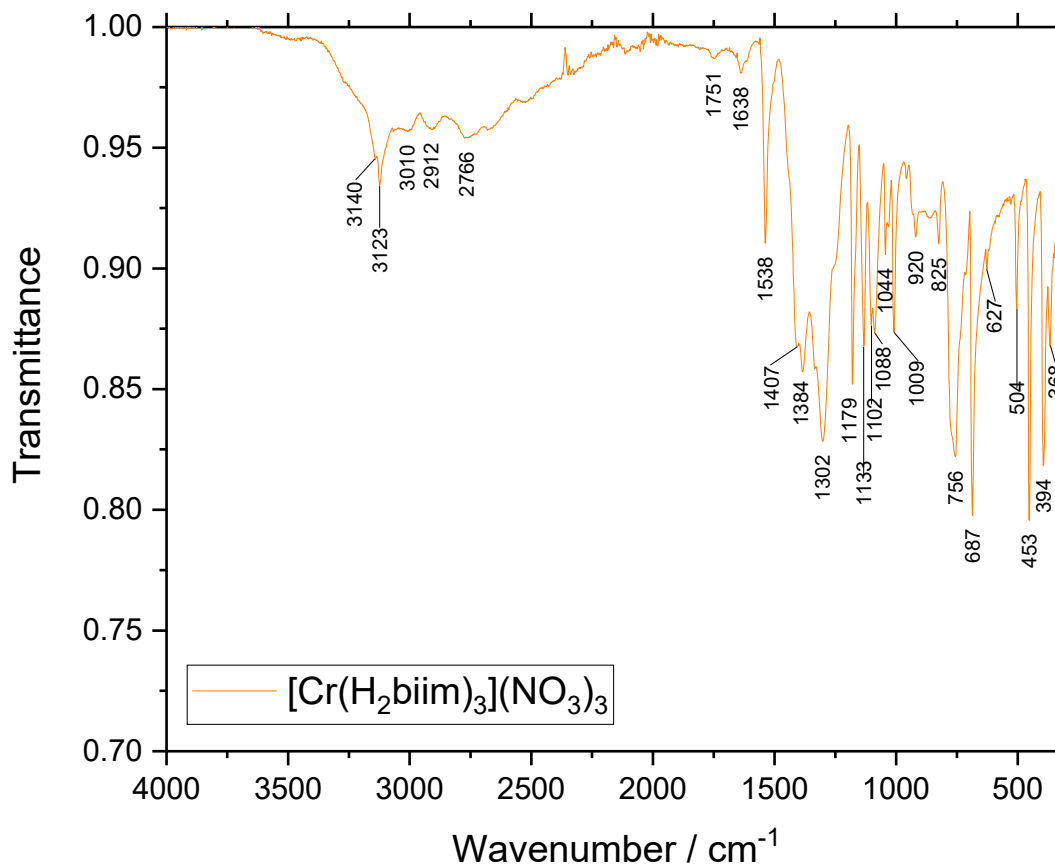

**Figure S14** FT-IR spectrum of the complex  $[\text{Cr}(\text{H}_2\text{biim})_3](\text{NO}_3)_3$  in the solid state.

**Table S29** Observed IR peaks and their respective attribution based on literature.<sup>36</sup>

| Observed position of peaks / $\text{cm}^{-1}$ | Attribution                |
|-----------------------------------------------|----------------------------|
| 3140; 3123                                    | $\nu$ C-H (aromatic)       |
| 3400-2250 (large band)                        | $\nu$ N-H                  |
| 1751-627                                      | Ligand vibrations          |
| 1384; 1302; 825                               | $\text{NO}_3^-$ vibrations |
| 504; 453                                      | Chelate ring deformation   |
| 394; 368                                      | $\nu$ Cr-N                 |

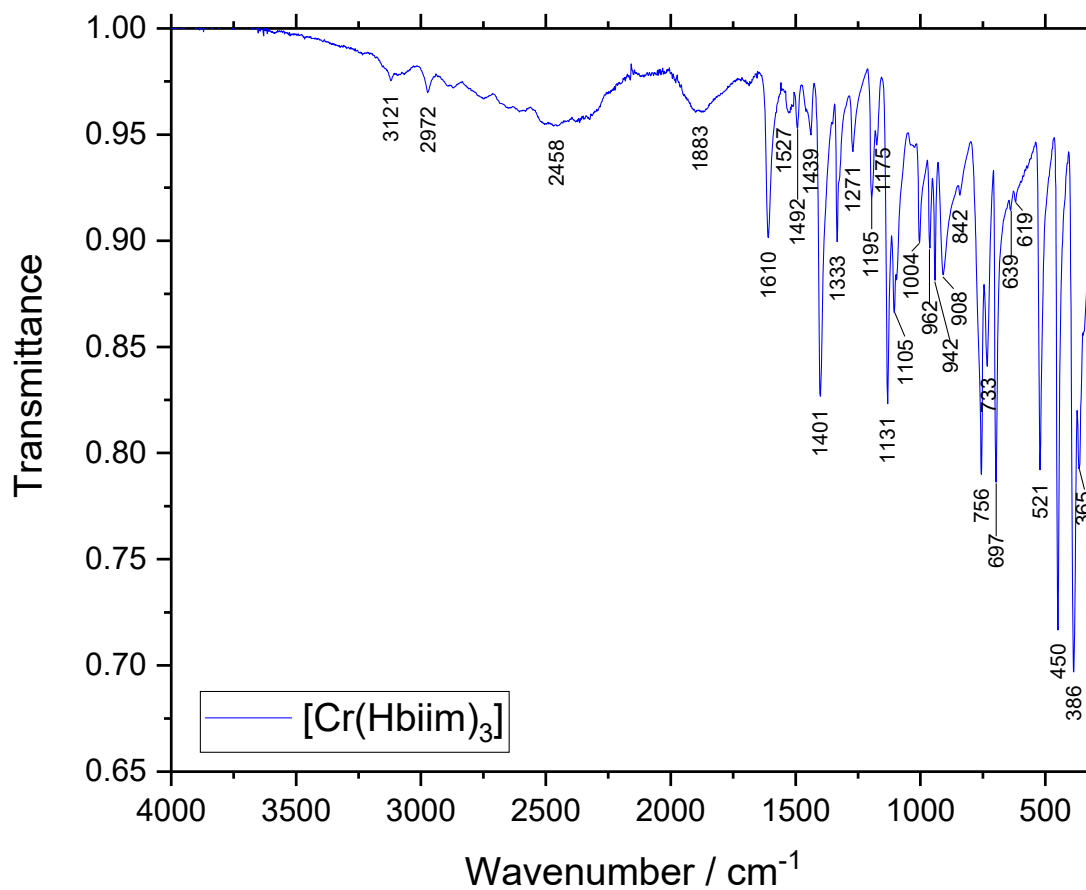

**Figure S15** FT-IR spectrum of the complex  $[\text{Cr}(\text{Hbiim})_3]$  in the solid state.

**Table S30** Observed IR peaks and their respective attribution based on literature.<sup>36</sup>

| Observed position of peaks / $\text{cm}^{-1}$ | Attribution               |
|-----------------------------------------------|---------------------------|
| 3121                                          | $\nu$ C-H (aromatic)      |
| 3200-2200 (large band)                        | $\nu$ N-H                 |
| 2972                                          | $\nu$ C-H (MeOH)          |
| 1883                                          | $2\gamma$ N-H             |
| 1756-619                                      | Ligand vibrations         |
| 521; 450                                      | Chelate ring deformations |
| 386; 365                                      | $\nu$ Cr-N                |



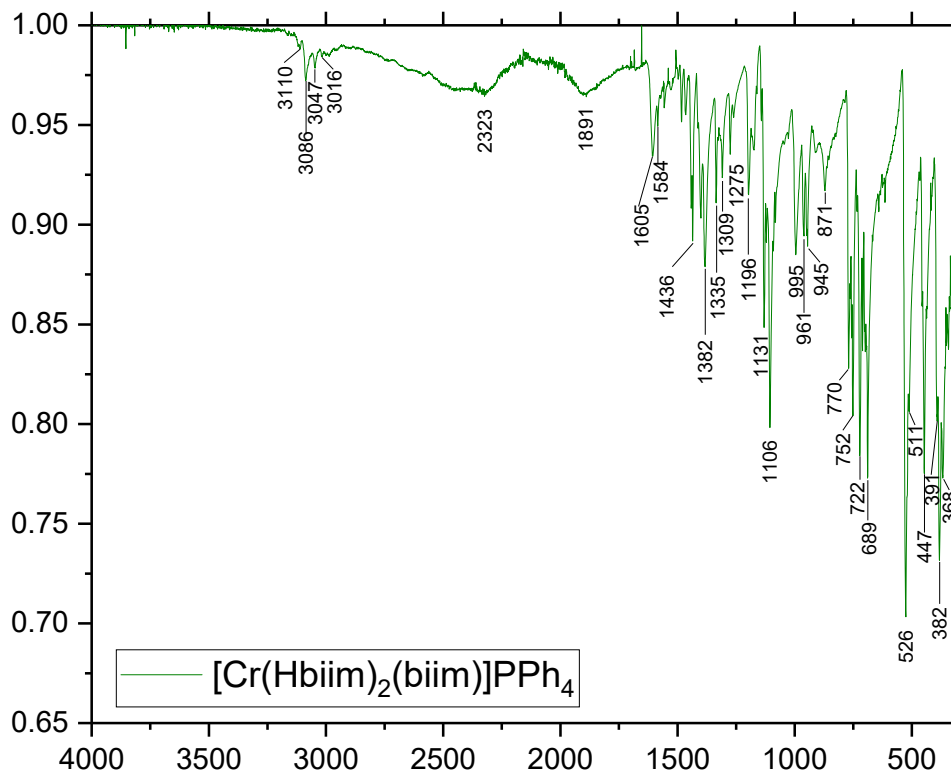

**Figure S16** FT-IR spectrum of the complex  $[\text{Cr}(\text{Hbiim})_2(\text{biim})]\text{PPh}_4$  in the solid state.

**Table S31** Observed IR peaks and their respective attribution based on literature.<sup>36</sup>

| Observed position of peaks / cm <sup>-1</sup>                       | Attribution               |
|---------------------------------------------------------------------|---------------------------|
| 3110; 3086                                                          | $\nu$ C-H (aromatic)      |
| 3000-2200 (large band)                                              | $\nu$ N-H                 |
| 1891                                                                | $2\gamma$ N-H             |
| 3047; 1584; 1483; 1436; 1309; 1106; 995;<br>770; 752; 722; 689; 526 | $\text{PPh}_4^+$          |
| 1605-600                                                            | Ligand vibrations         |
| 511; 447                                                            | Chelate ring deformations |
| 391; 382; 368                                                       | $\nu$ Cr-N                |

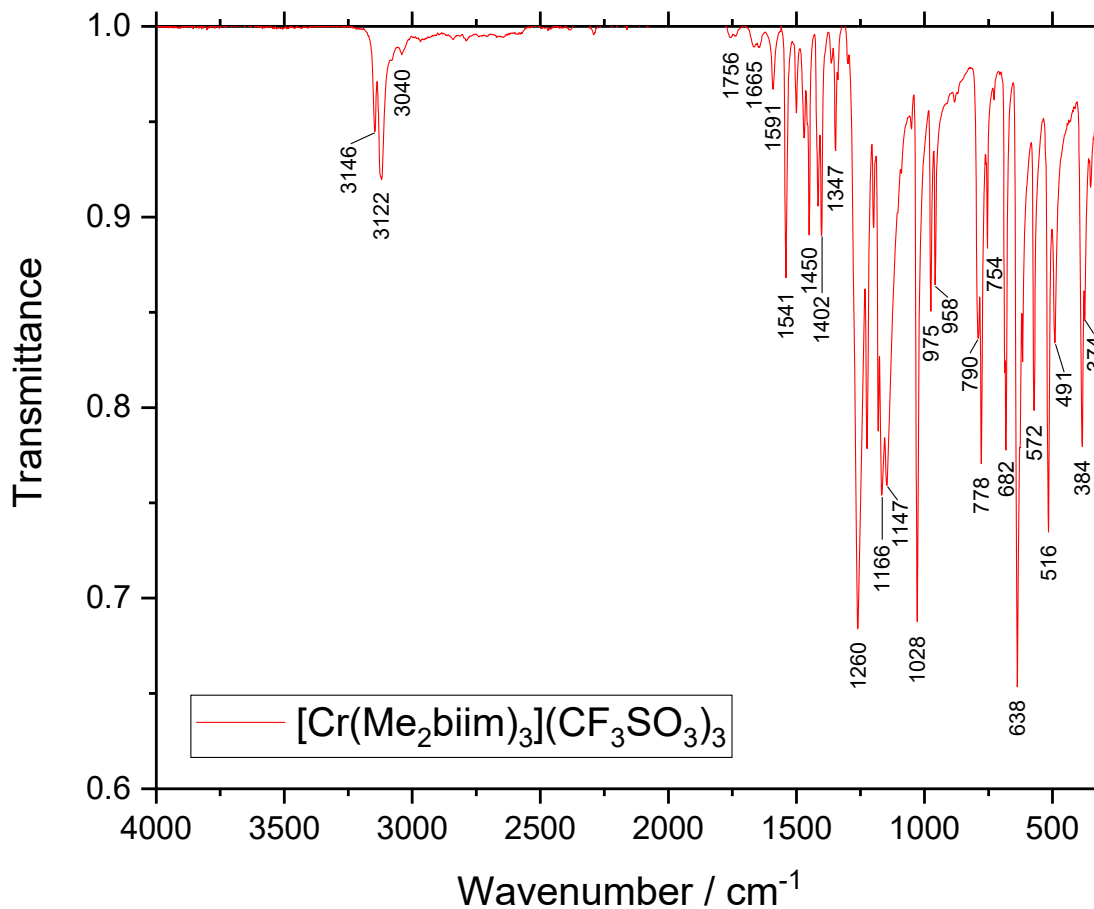

**Figure S17** FT-IR spectrum of the complex  $[\text{Cr}(\text{Me}_2\text{biim})_3](\text{CF}_3\text{SO}_3)_3$  in the solid state.

**Table S32** Observed IR peaks and their respective attribution based on literature.<sup>36</sup>

| Observed position of peaks / $\text{cm}^{-1}$ | Attribution                  |
|-----------------------------------------------|------------------------------|
| 3146; 3122                                    | $\nu$ C-H (aromatic)         |
| 3040                                          | $\nu$ C-H ( $-\text{CH}_3$ ) |
| 1756-616                                      | Ligand vibrations            |
| 1260; 1224; 1167; 778; 1028; 638; 572; 516;   | $\text{CF}_3\text{SO}_3^-$   |
| 491                                           | Chelate ring deformation     |
| 384; 374                                      | $\nu$ Cr-N                   |

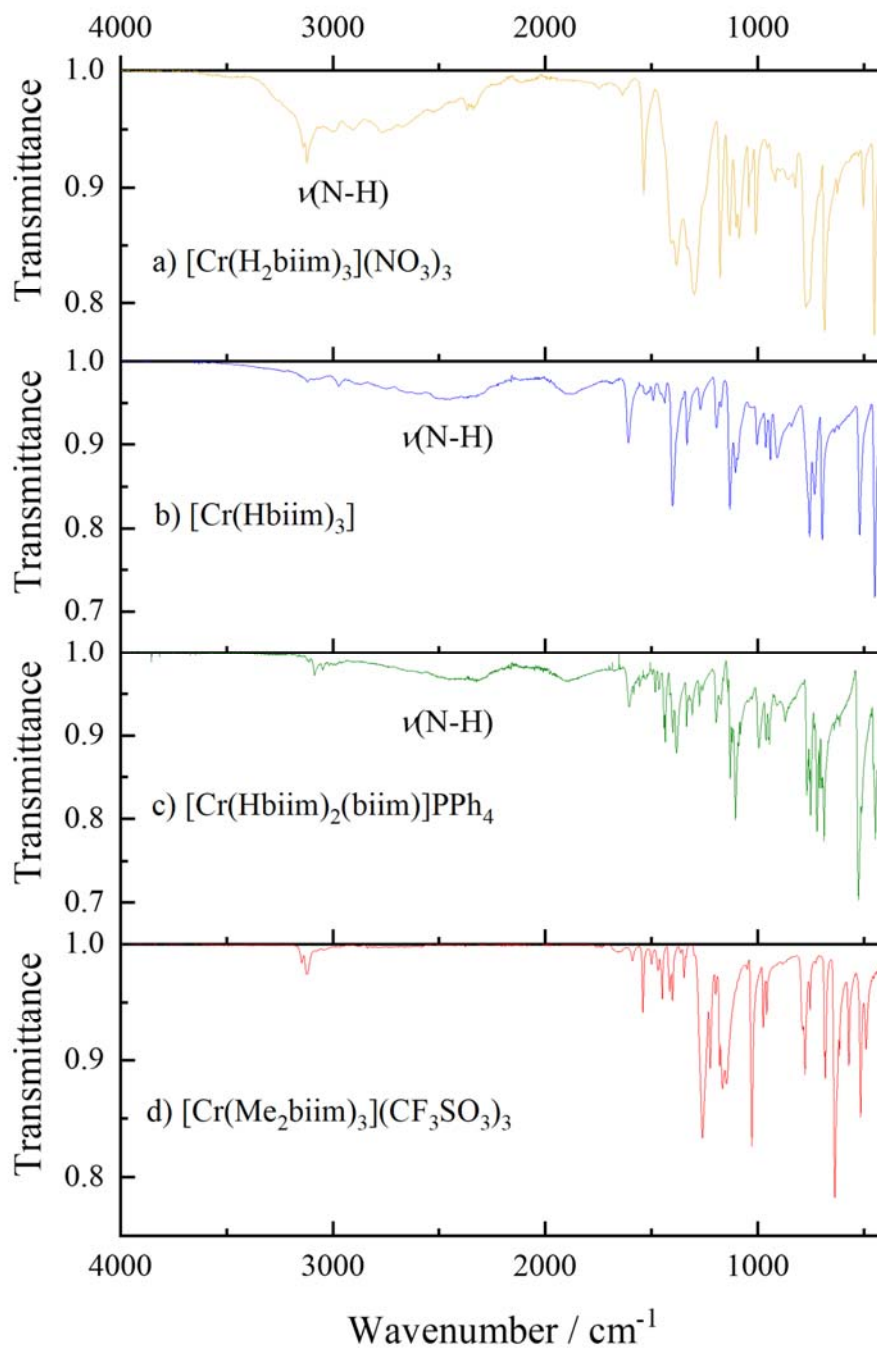

**Figure S18** Stacked solid state FT-IR spectrum of a)  $[\text{Cr}(\text{H}_2\text{biim})_3](\text{NO}_3)_3$  (orange), b)  $[\text{Cr}(\text{Hbiim})_3]$  (blue), c)  $[\text{Cr}(\text{Hbiim})_2(\text{biim})]\text{PPh}_4$  (green) and d)  $[\text{Cr}(\text{Me}_2\text{biim})_3](\text{CF}_3\text{SO}_3)_3$  (red).

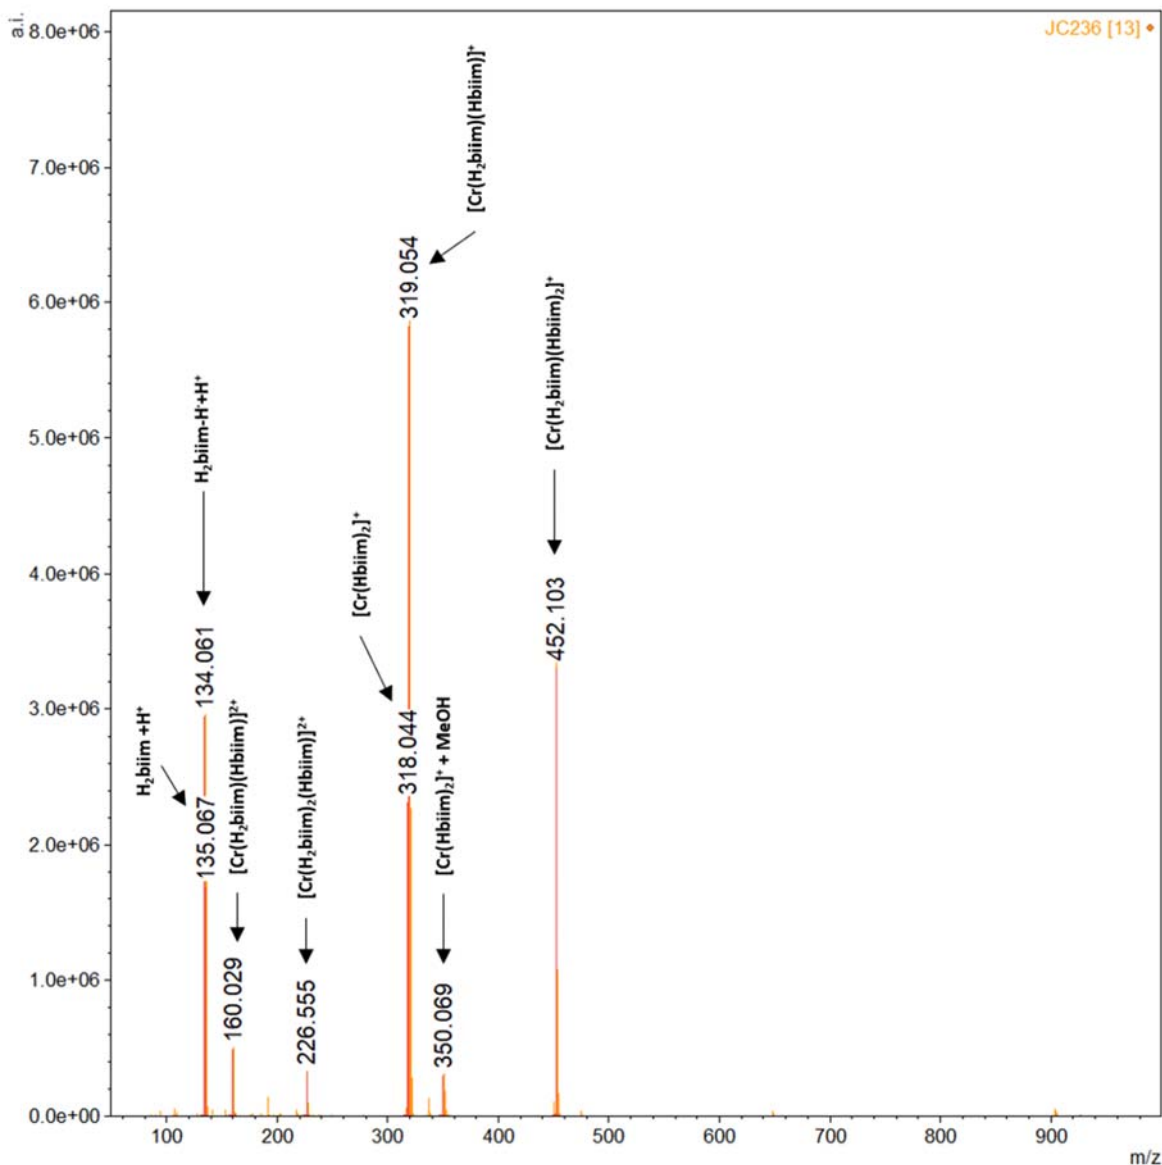

**Figure S19** ESI-MS full spectrum of the complex  $[\text{Cr}(\text{H}_2\text{biim})_3](\text{NO}_3)_3$  in MeOH.

**Table S33** Observed  $m/z$ , intensity and attribution of each peak observed in the MS spectrum of  $[\text{Cr}(\text{H}_2\text{biim})_3](\text{NO}_3)_3$  in MeOH.

| Peak n° | $m/z$   | Intensity / a.u. | Attribution (fragment)                                    | Molecular formula                                  | Calc. $m/z$ |
|---------|---------|------------------|-----------------------------------------------------------|----------------------------------------------------|-------------|
| 1       | 134.061 | 2.95E+06         | $\text{H}_2\text{biim-H}^+\text{H}^+$                     | $\text{C}_6\text{H}_6\text{N}_4^+$                 | 134.0587    |
| 2       | 135.067 | 1.69E+06         | $\text{H}_2\text{biim} + \text{H}^+$                      | $\text{C}_6\text{H}_7\text{N}_4^+$                 | 135.0665    |
| 3       | 159.525 | 1.08E+05         | $[\text{Cr}(\text{H}_2\text{biim})(\text{Hbiim})]^{2+}$   | $\text{C}_{12}\text{H}_{11}\text{CrN}_8^{2+}$      | 159.5250    |
| 4       | 160.029 | 4.93E+05         | $[\text{Cr}(\text{H}_2\text{biim})_2]^{2+}$               | $\text{C}_{12}\text{H}_{12}\text{CrN}_8^{2+}$      | 160.0289    |
| 5       | 226.555 | 3.28E+05         | $[\text{Cr}(\text{H}_2\text{biim})_2(\text{Hbiim})]^{2+}$ | $\text{C}_{18}\text{H}_{17}\text{CrN}_{12}^{2+}$   | 226.5547    |
| 6       | 318.044 | 2.32E+06         | $[\text{Cr}(\text{Hbiim})_2]^+$                           | $\text{C}_{12}\text{H}_{10}\text{CrN}_8^+$         | 318.0428    |
| 7       | 319.054 | 5.83E+06         | $[\text{Cr}(\text{H}_2\text{biim})(\text{Hbiim})]^+$      | $\text{C}_{12}\text{H}_{11}\text{CrN}_8^+$         | 319.0506    |
| 8       | 350.069 | 3.04E+05         | $[\text{Cr}(\text{Hbiim})_2]^+ + \text{MeOH}$             | $\text{C}_{13}\text{H}_{14}\text{CrN}_8\text{O}^+$ | 350.0690    |
| 9       | 452.103 | 3.30E+06         | $[\text{Cr}(\text{H}_2\text{biim})(\text{Hbiim})_2]^+$    | $\text{C}_{18}\text{H}_{16}\text{CrN}_{12}^+$      | 452.1021    |

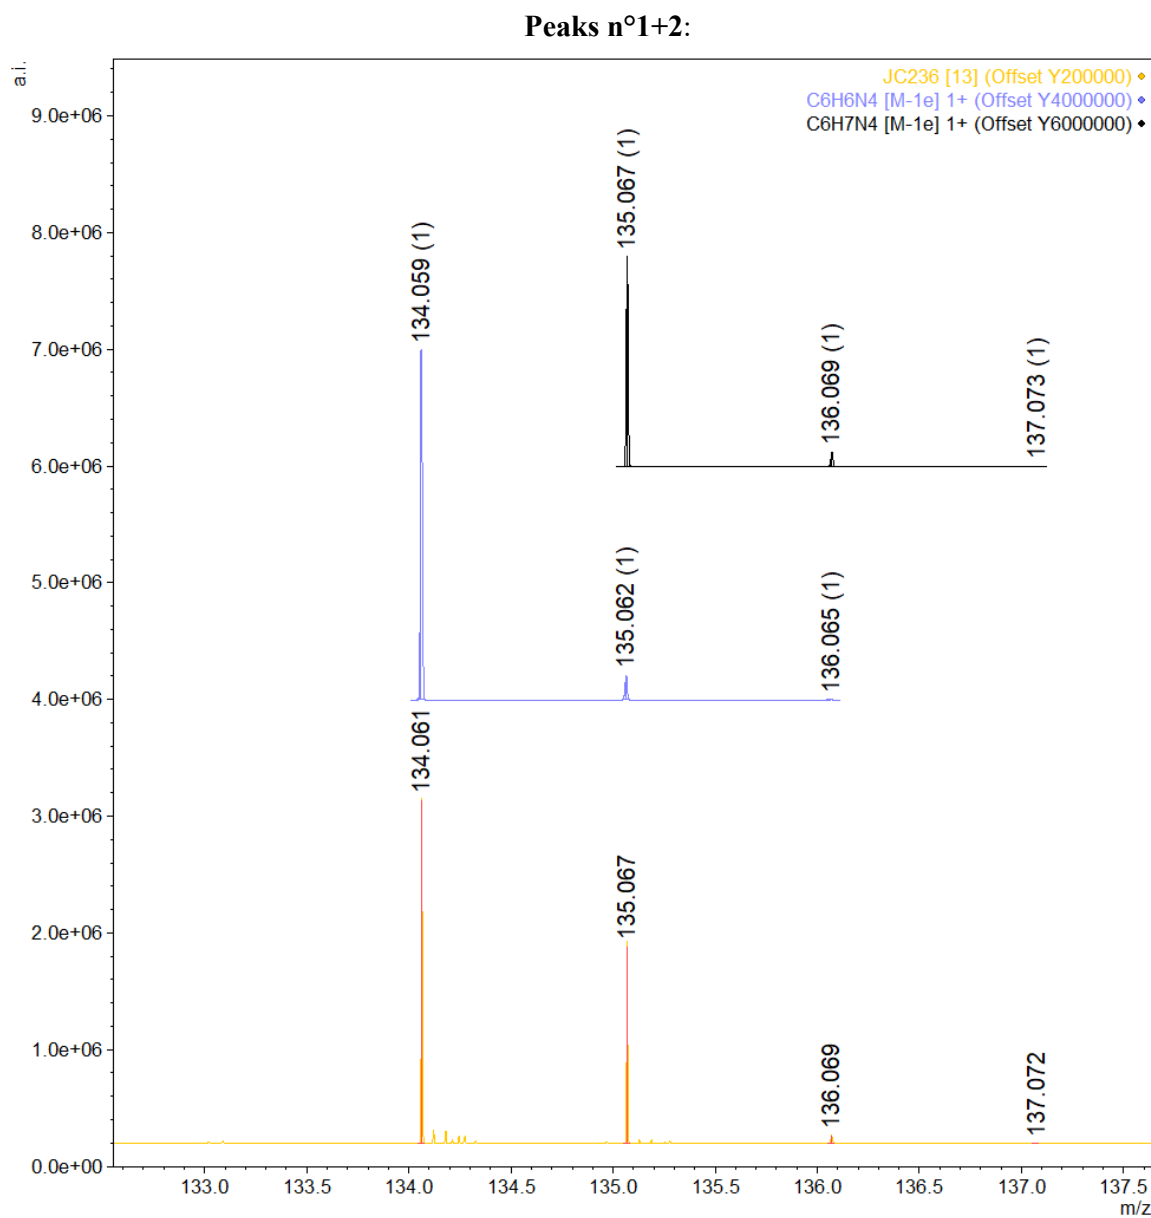

**Figure S20** Experimental ESI-MS spectrum of  $[\text{Cr}(\text{H}_2\text{biim})_3](\text{NO}_3)_3$  in MeOH (orange). Calculated peaks for  $\text{H}_2\text{biim}-\text{H}^+\text{H}^+$ ,  $\text{C}_6\text{H}_6\text{N}_4^+$  (purple); and for  $\text{H}_2\text{biim}+\text{H}^+$ ,  $\text{C}_6\text{H}_7\text{N}_4^+$  (black).

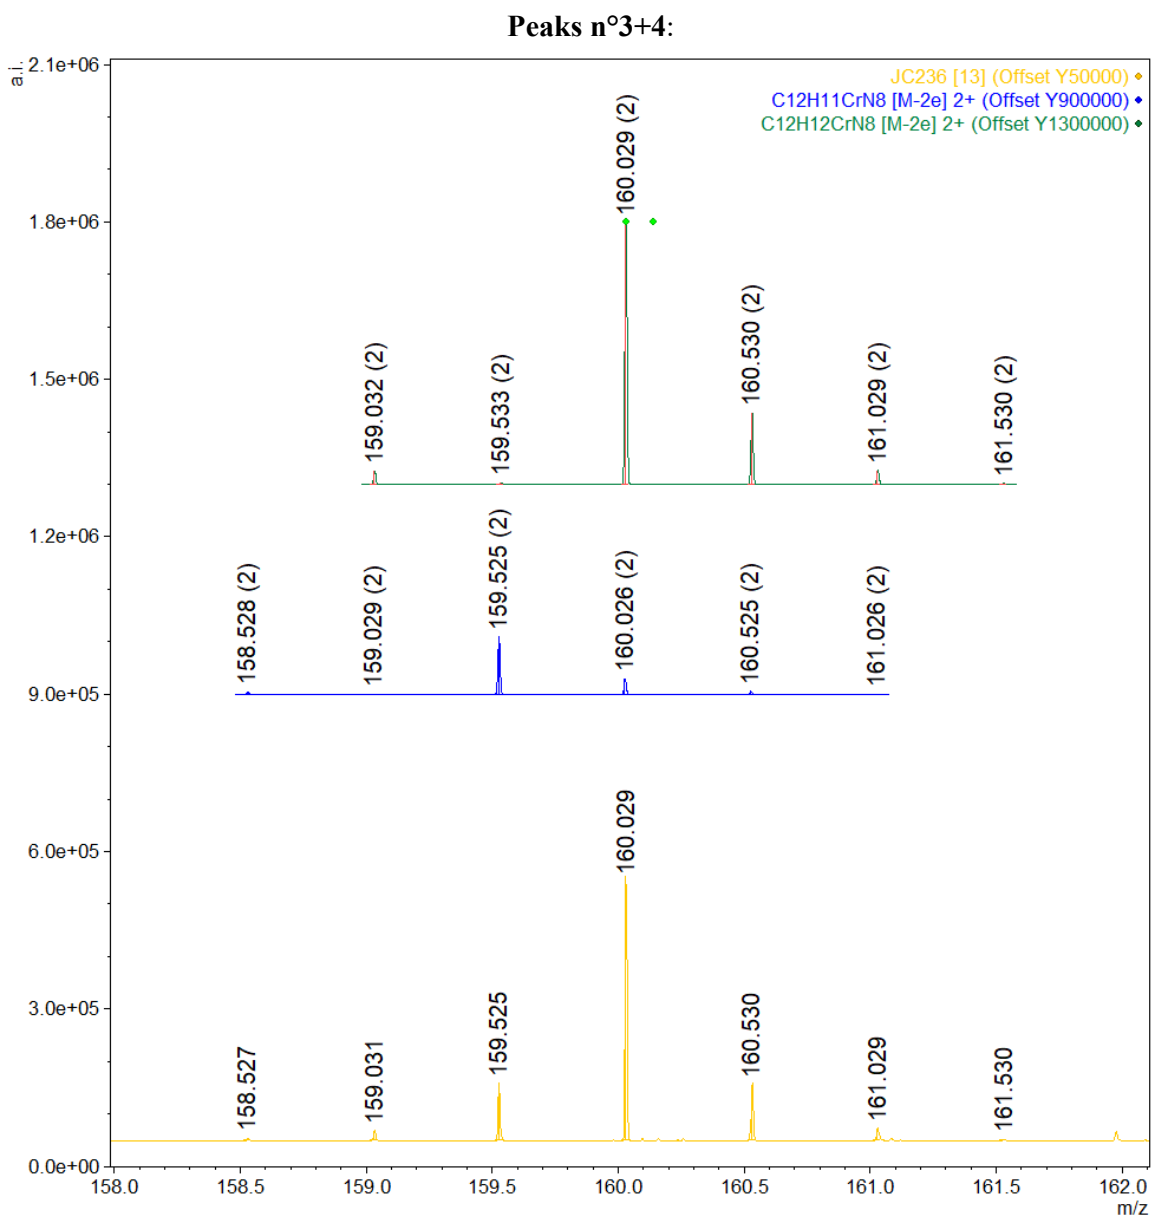

**Figure S21** Experimental ESI-MS spectrum of  $[\text{Cr}(\text{H}_2\text{biim})_3](\text{NO}_3)_3$  in MeOH (orange). Calculated peaks for  $[\text{Cr}(\text{H}_2\text{biim})(\text{Hbiim})]^{2+}$ ,  $\text{C}_{12}\text{H}_{11}\text{CrN}_8^{2+}$  (blue); and for  $[\text{Cr}(\text{H}_2\text{biim})_2]^{2+}$ ;  $\text{C}_{12}\text{H}_{12}\text{CrN}_8^{2+}$  (green).

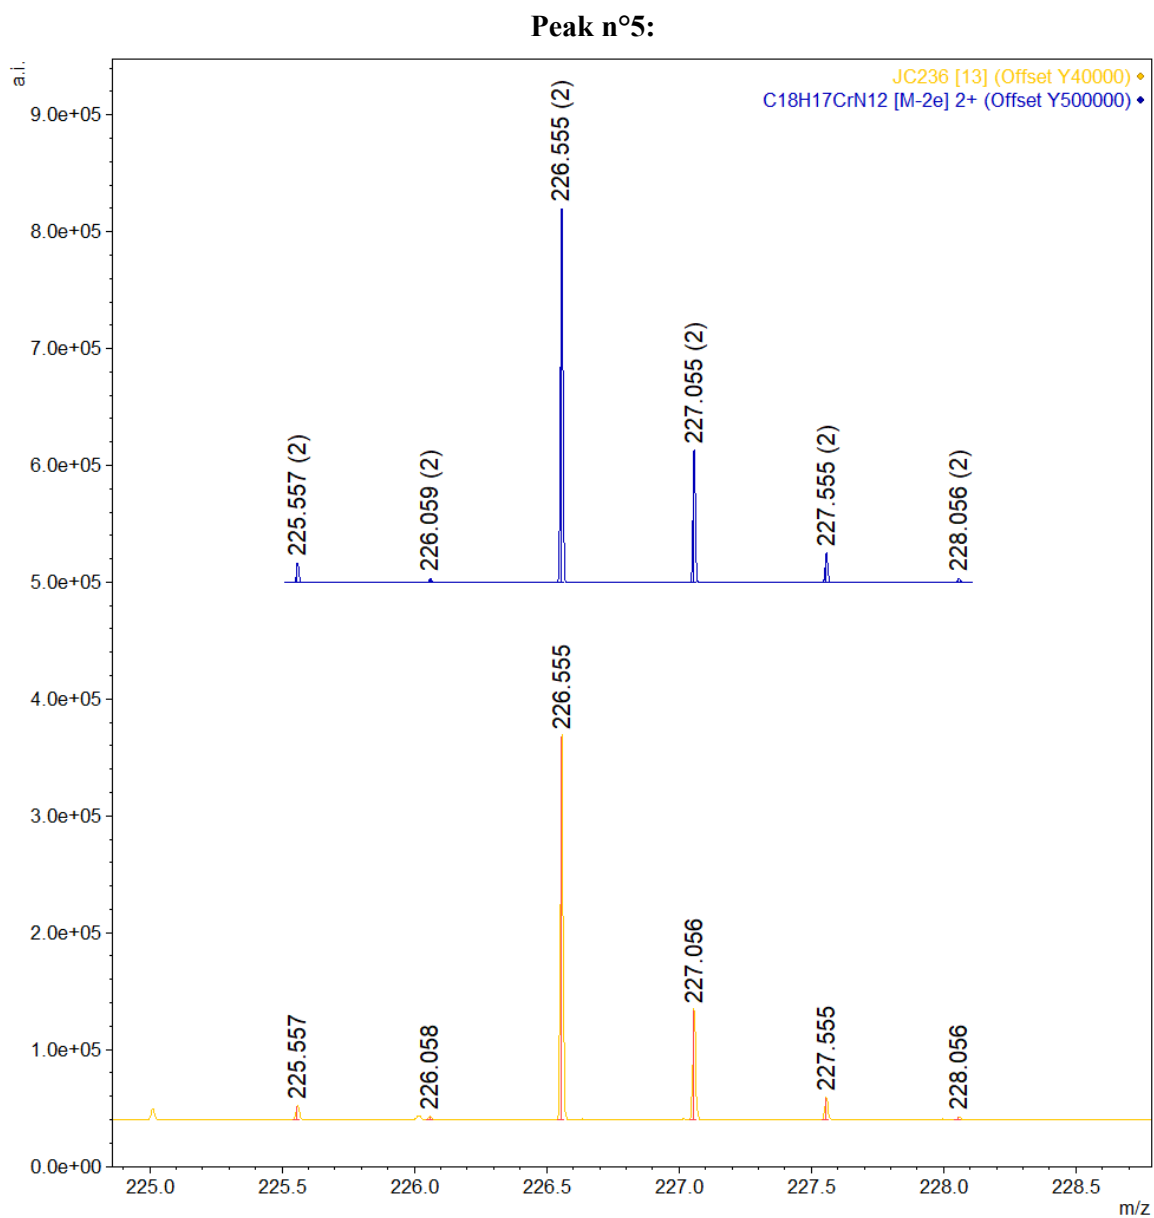

**Figure S22** Experimental ESI-MS spectrum of  $[\text{Cr}(\text{H}_2\text{biim})_3](\text{NO}_3)_3$  in MeOH (orange). Calculated peaks for  $[\text{Cr}(\text{H}_2\text{biim})_2(\text{Hbiim})]^{2+}$ ,  $\text{C}_{18}\text{H}_{17}\text{CrN}_{12}^{2+}$  (dark blue).

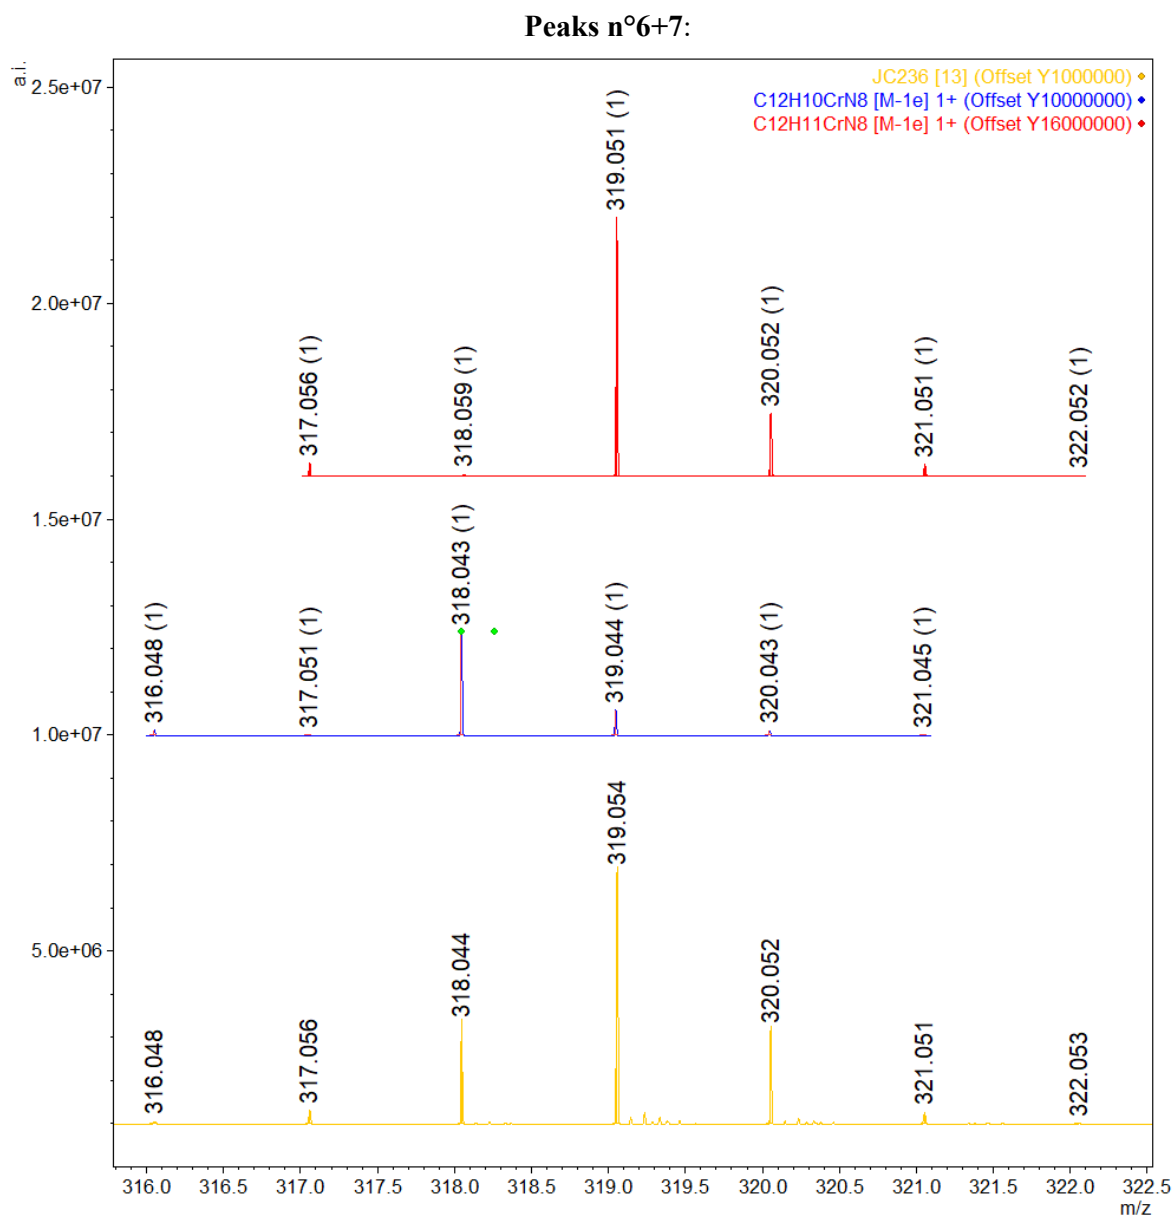

**Figure S23** Experimental ESI-MS spectrum of  $[\text{Cr}(\text{H}_2\text{biim})_3](\text{NO}_3)_3$  in MeOH (orange). Calculated peaks for  $[\text{Cr}(\text{Hbiim})_2]^+$ ,  $\text{C}_{12}\text{H}_{10}\text{CrN}_8^+$  (blue); and for  $[\text{Cr}(\text{H}_2\text{biim})(\text{Hbiim})]^+$ ,  $\text{C}_{12}\text{H}_{11}\text{CrN}_8^+$  (red).



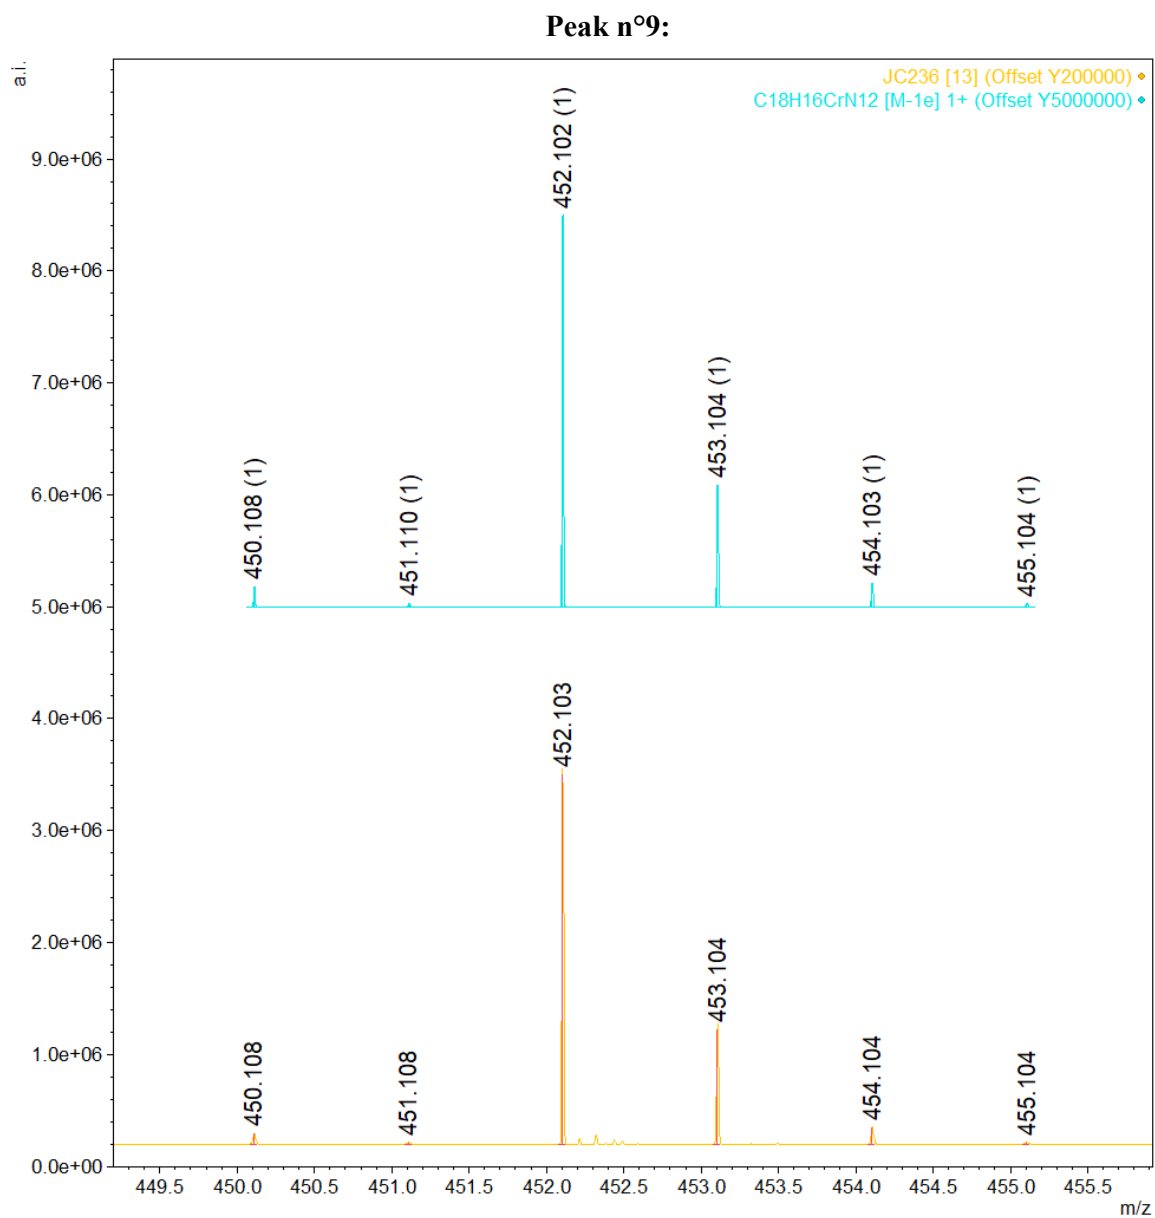

**Figure S24** Experimental ESI-MS spectrum of  $[\text{Cr}(\text{H}_2\text{biim})_3](\text{NO}_3)_3$  in MeOH (orange). Calculated peaks for  $[\text{Cr}(\text{H}_2\text{biim})(\text{Hbiim})_2]^{2+}$ ,  $\text{C}_{18}\text{H}_{16}\text{CrN}_{12}^+$  (cyan).

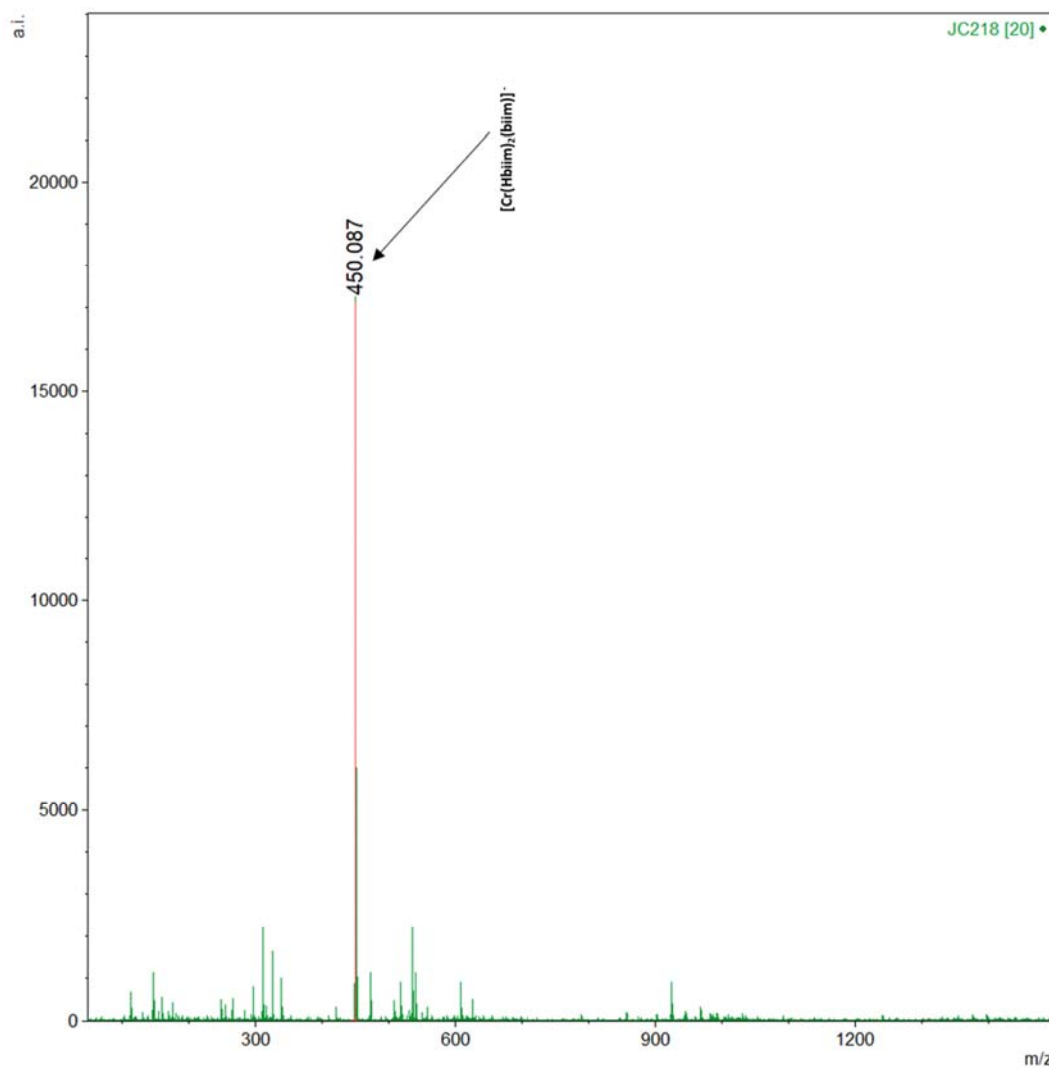

**Figure S25** ESI-MS full spectrum of the complex  $[\text{Cr}(\text{Hbiim})_2(\text{biim})]\text{PPh}_4$  in MeOH, negative mode.

**Table S34** Observed  $m/z$ , intensity and attribution of each peak observed in the ESI-MS spectrum of  $[\text{Cr}(\text{Hbiim})_2(\text{biim})]\text{PPh}_4$  in MeOH.

| Peak n° | $m/z$   | Intensity | Attribution                                  | Molecular formula                             | Calc. $m/z$ |
|---------|---------|-----------|----------------------------------------------|-----------------------------------------------|-------------|
| 1       | 450.087 | 1.71E+04  | $[\text{Cr}(\text{Hbiim})_2(\text{biim})]^-$ | $\text{C}_{18}\text{H}_{14}\text{CrN}_{12}^-$ | 450.0875    |

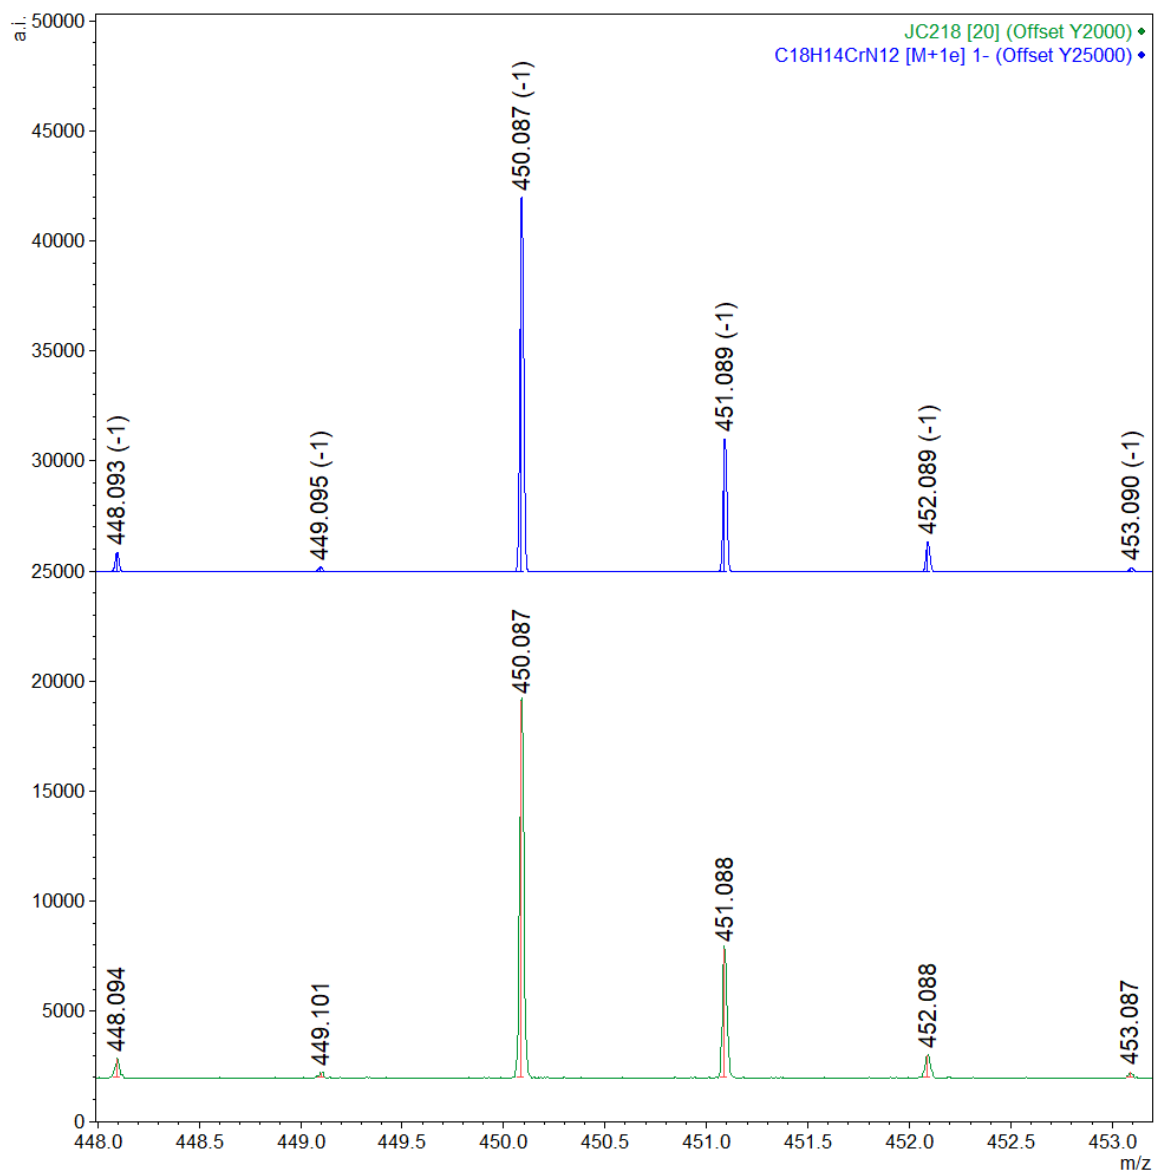

**Figure S26** Experimental ESI-MS spectrum of  $[\text{Cr}(\text{Hbiim})_2(\text{biim})]\text{PPh}_4$  in MeOH (green). Calculated peaks for  $[\text{Cr}(\text{Hbiim})_2(\text{biim})]^-$ ,  $\text{C}_{18}\text{H}_{14}\text{CrN}_{12}^-$  (blue).

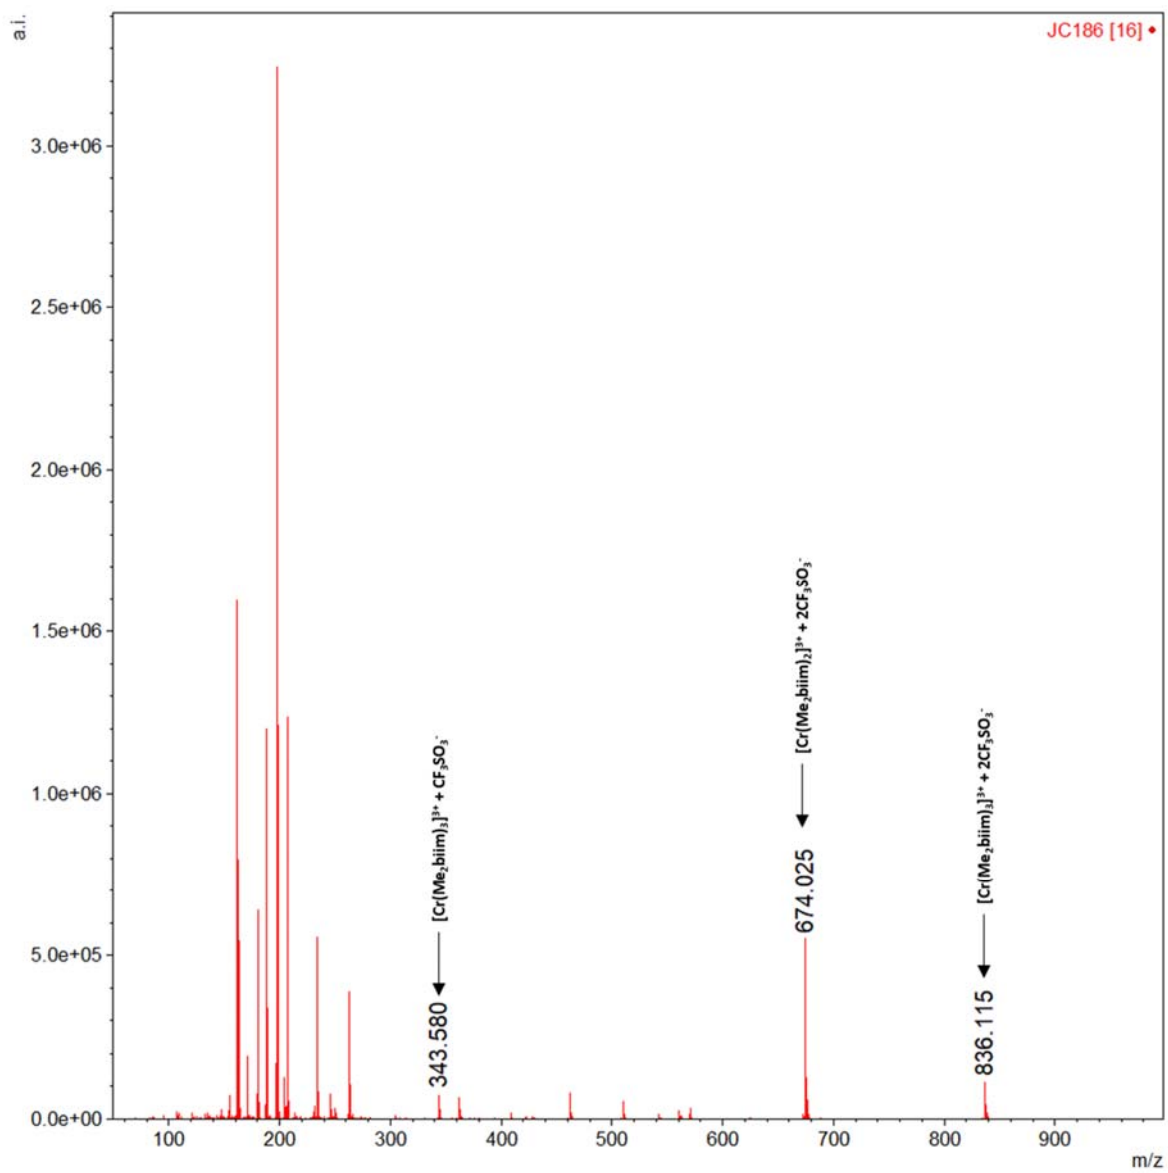

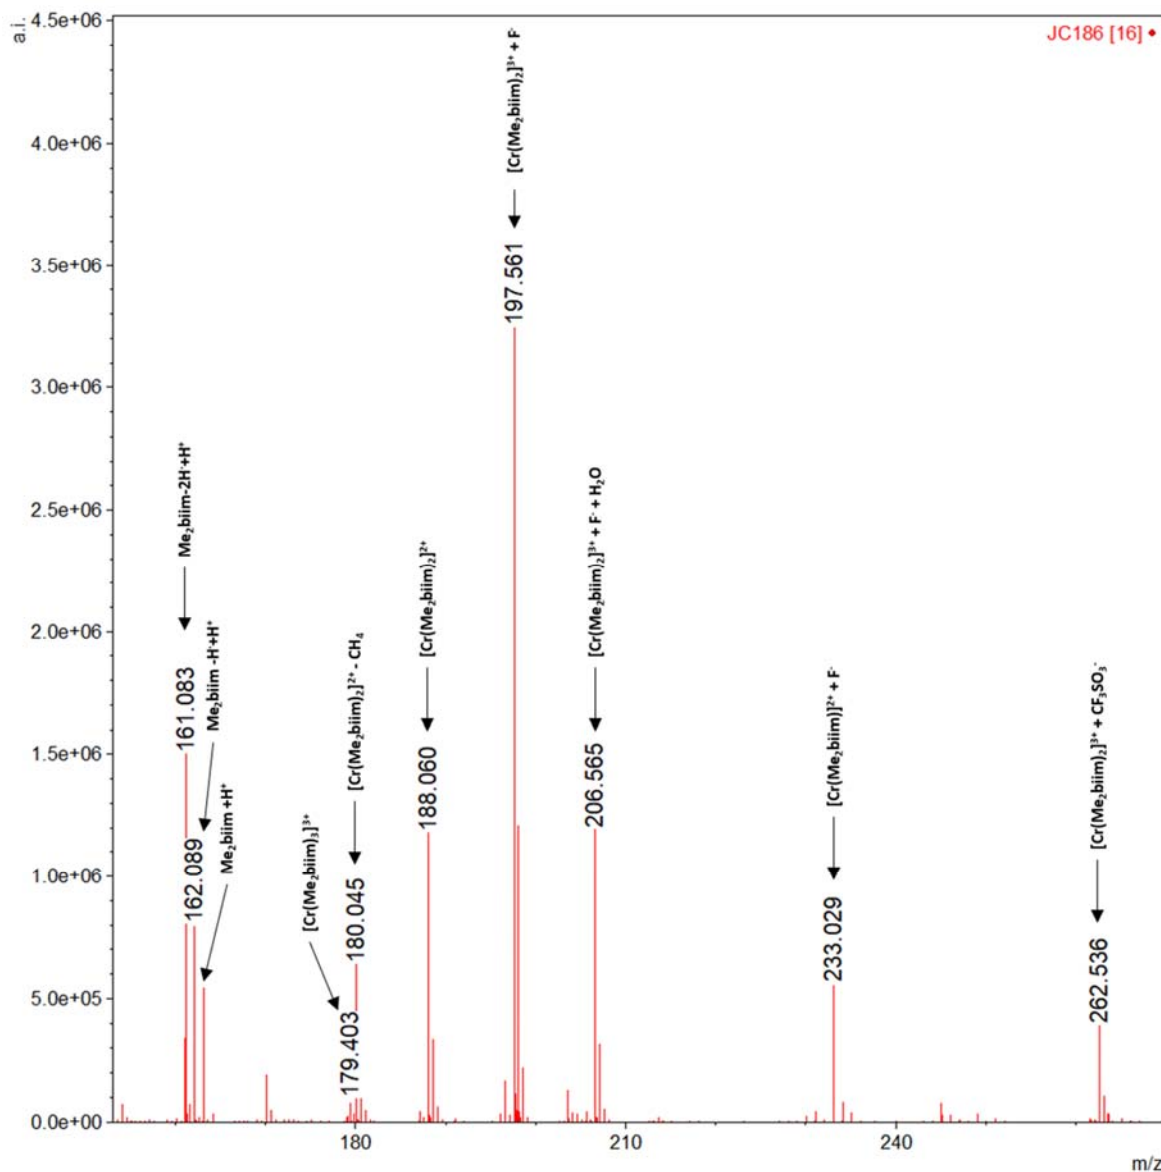

**Figure S27** ESI-MS full spectrum of the complex  $[\text{Cr}(\text{Me}_2\text{biim})_3](\text{CF}_3\text{SO}_3)_3$  in  $\text{CH}_3\text{CN}$  (top), mode positive; zoomed spectrum (bottom).

**Table S35** Observed  $m/z$ , intensity and attribution of each peak observed in the ESI-MS spectrum of  $[\text{Cr}(\text{Me}_2\text{biim})_3](\text{CF}_3\text{SO}_3)_3$  in  $\text{CH}_3\text{CN}$ .

| Peak n° | $m/z$   | Intensity | Attribution                                                           | Molecular formula                                                            | Calc. $m/z$ |
|---------|---------|-----------|-----------------------------------------------------------------------|------------------------------------------------------------------------------|-------------|
| 1       | 161.083 | 1.48E+06  | $\text{Me}_2\text{biim}-2\text{H}^+\text{H}^+$                        | $\text{C}_8\text{H}_9\text{N}_4^+$                                           | 161.0822    |
| 2       | 162.089 | 7.82E+05  | $\text{Me}_2\text{biim}-\text{H}^+\text{H}^+$                         | $\text{C}_8\text{H}_{10}\text{N}_4^+$                                        | 162.0900    |
| 3       | 163.097 | 5.36E+05  | $\text{Me}_2\text{biim}+\text{H}^+$                                   | $\text{C}_8\text{H}_{11}\text{N}_4^+$                                        | 163.0978    |
| 4       | 179.403 | 7.27E+04  | $[\text{Cr}(\text{Me}_2\text{biim})_3]^{3+}$                          | $\text{C}_{24}\text{H}_{30}\text{CrN}_{12}^{3+}$                             | 179.4035    |
| 5       | 180.045 | 6.19E+05  | $[\text{Cr}(\text{Me}_2\text{biim})_2]^{2+}-\text{CH}_4$              | $\text{C}_{15}\text{H}_{16}\text{CrN}_8^{2+}$                                | 180.0446    |
| 6       | 188.060 | 1.16E+06  | $[\text{Cr}(\text{Me}_2\text{biim})_2]^{2+}$                          | $\text{C}_{16}\text{H}_{20}\text{CrN}_8^{2+}$                                | 188.0602    |
| 7       | 197.561 | 3.23E+06  | $[\text{Cr}(\text{Me}_2\text{biim})_2]^{3+}+\text{F}^-$               | $\text{C}_{16}\text{H}_{20}\text{CrFN}_8^{2+}$                               | 197.5595    |
| 8       |         |           | $[\text{Cr}(\text{Me}_2\text{biim})_2]^{3+}+\text{F}^-+$              | $\text{C}_{16}\text{H}_{22}\text{CrFN}_8\text{O}^{2+}$                       |             |
|         | 206.565 | 1.17E+06  | $\text{H}_2\text{O}$                                                  |                                                                              | 206.5647    |
| 9       | 233.029 | 5.42E+05  | $[\text{Cr}(\text{Me}_2\text{biim})]^{2+}+\text{F}^-$                 | $\text{C}_8\text{H}_{10}\text{CrFN}_4^+$                                     | 233.0289    |
| 10      | 262.536 | 3.75E+05  | $[\text{Cr}(\text{Me}_2\text{biim})_2]^{3+}+\text{CF}_3\text{SO}_3^-$ | $\text{C}_{17}\text{H}_{20}\text{CrF}_3\text{N}_8\text{O}_3\text{S}^{2+}$    | 262.5363    |
| 11      | 343.580 | 7.34E+04  | $[\text{Cr}(\text{Me}_2\text{biim})_3]^{3+}+\text{CF}_3\text{SO}_3^-$ | $\text{C}_{25}\text{H}_{30}\text{CrF}_3\text{N}_{12}\text{O}_3\text{S}^{2+}$ | 343.5816    |
| 12      |         |           | $[\text{Cr}(\text{Me}_2\text{biim})_2]^{3+}+$                         | $\text{C}_{18}\text{H}_{20}\text{CrF}_6\text{N}_8\text{O}_6\text{S}_2^+$     |             |
|         | 674.025 | 5.48E+05  | $2\text{CF}_3\text{SO}_3^-$                                           |                                                                              | 674.0251    |
| 13      |         |           | $[\text{Cr}(\text{Me}_2\text{biim})_3]^{3+}+$                         | $\text{C}_{26}\text{H}_{30}\text{CrF}_6\text{N}_{12}\text{O}_6\text{S}_2^+$  |             |
|         | 836.115 | 1.09E+05  | $2\text{CF}_3\text{SO}_3^-$                                           |                                                                              | 836.1157    |

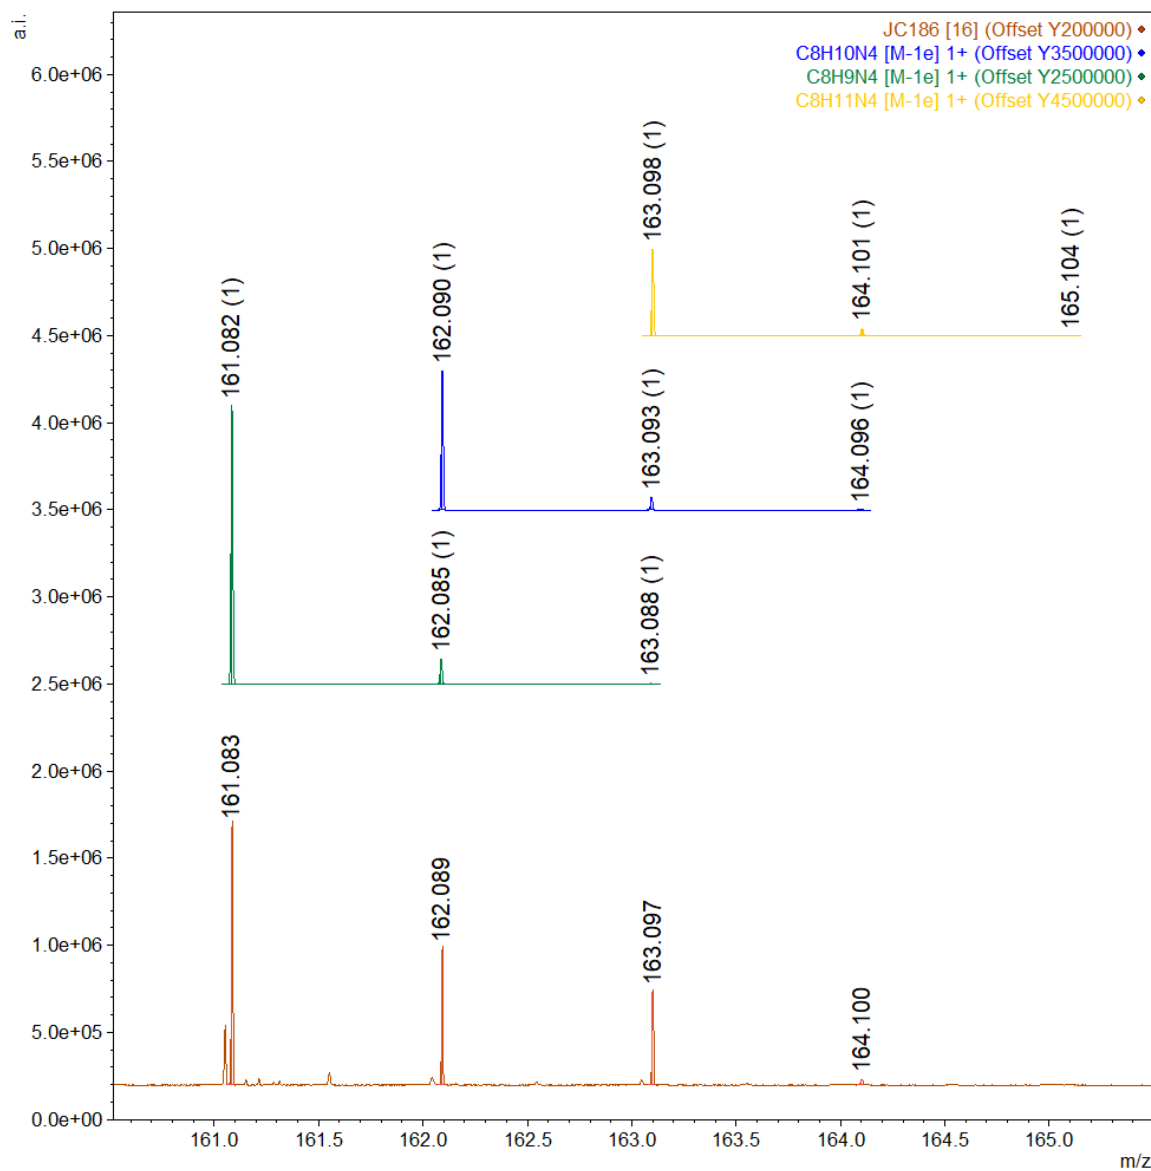

**Figure S28** Experimental ESI-MS spectrum of  $[\text{Cr}(\text{Me}_2\text{biim})_3](\text{CF}_3\text{SO}_3)_3$  in  $\text{CH}_3\text{CN}$  (red). Calculated peaks for  $\text{Me}_2\text{biim}-2\text{H}^+\text{H}^+$ ,  $\text{C}_8\text{H}_9\text{N}_4^+$  (green); for  $\text{Me}_2\text{biim}-\text{H}^+\text{H}^+$ ,  $\text{C}_8\text{H}_{10}\text{N}_4^+$  (blue); and for  $\text{Me}_2\text{biim}+\text{H}^+$ ,  $\text{C}_8\text{H}_{11}\text{N}_4^+$  (orange).

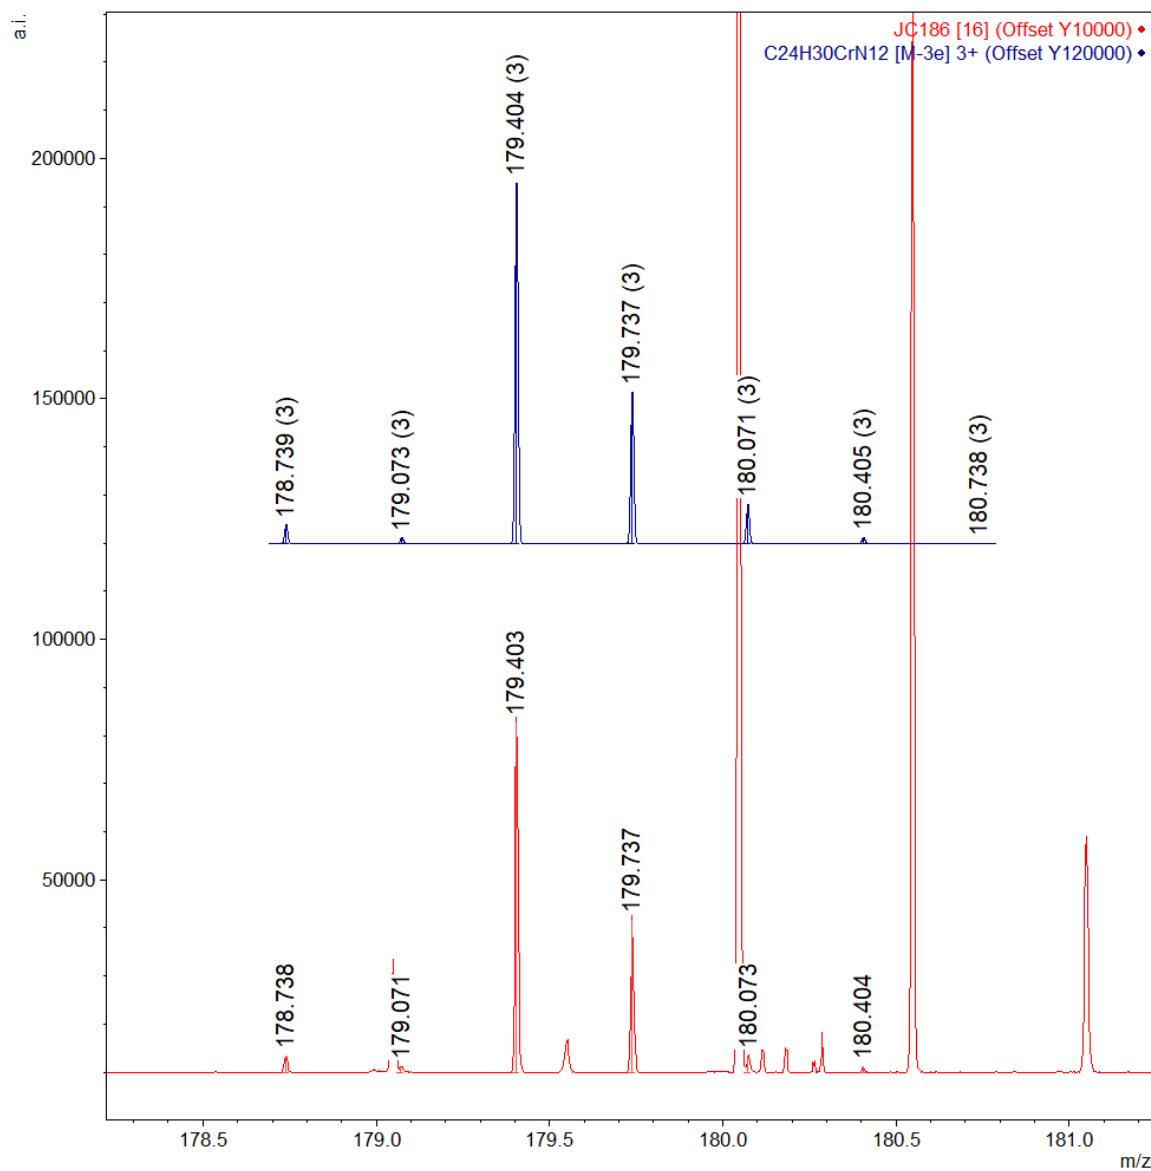

**Figure S29** Experimental ESI-MS spectrum of  $[\text{Cr}(\text{Me}_2\text{biim})_3](\text{CF}_3\text{SO}_3)_3$  in  $\text{CH}_3\text{CN}$  (red). Calculated peaks for  $[\text{Cr}(\text{Me}_2\text{biim})_3]^{3+}$ ,  $\text{C}_{24}\text{H}_{30}\text{CrN}_{12}^{3+}$  (dark blue).



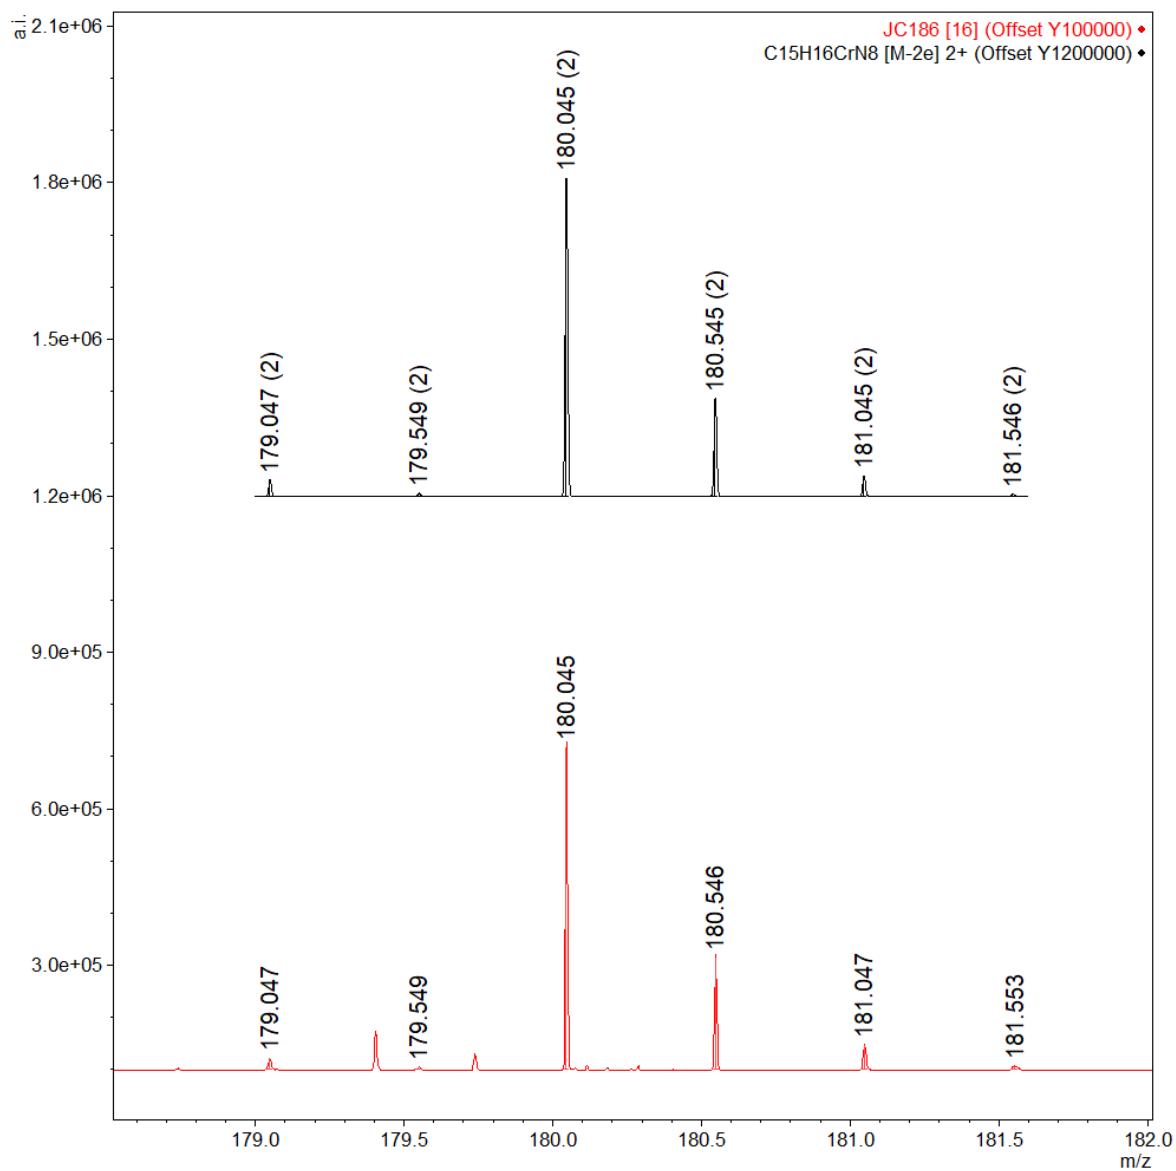

**Figure S30** Experimental ESI-MS spectrum of  $[\text{Cr}(\text{Me}_2\text{biim})_3](\text{CF}_3\text{SO}_3)_3$  in  $\text{CH}_3\text{CN}$  (red). Calculated peaks for  $[\text{Cr}(\text{Me}_2\text{biim})_2]^{2+} - \text{CH}_4$ ,  $\text{C}_{15}\text{H}_{16}\text{CrN}_8^{2+}$  (black).

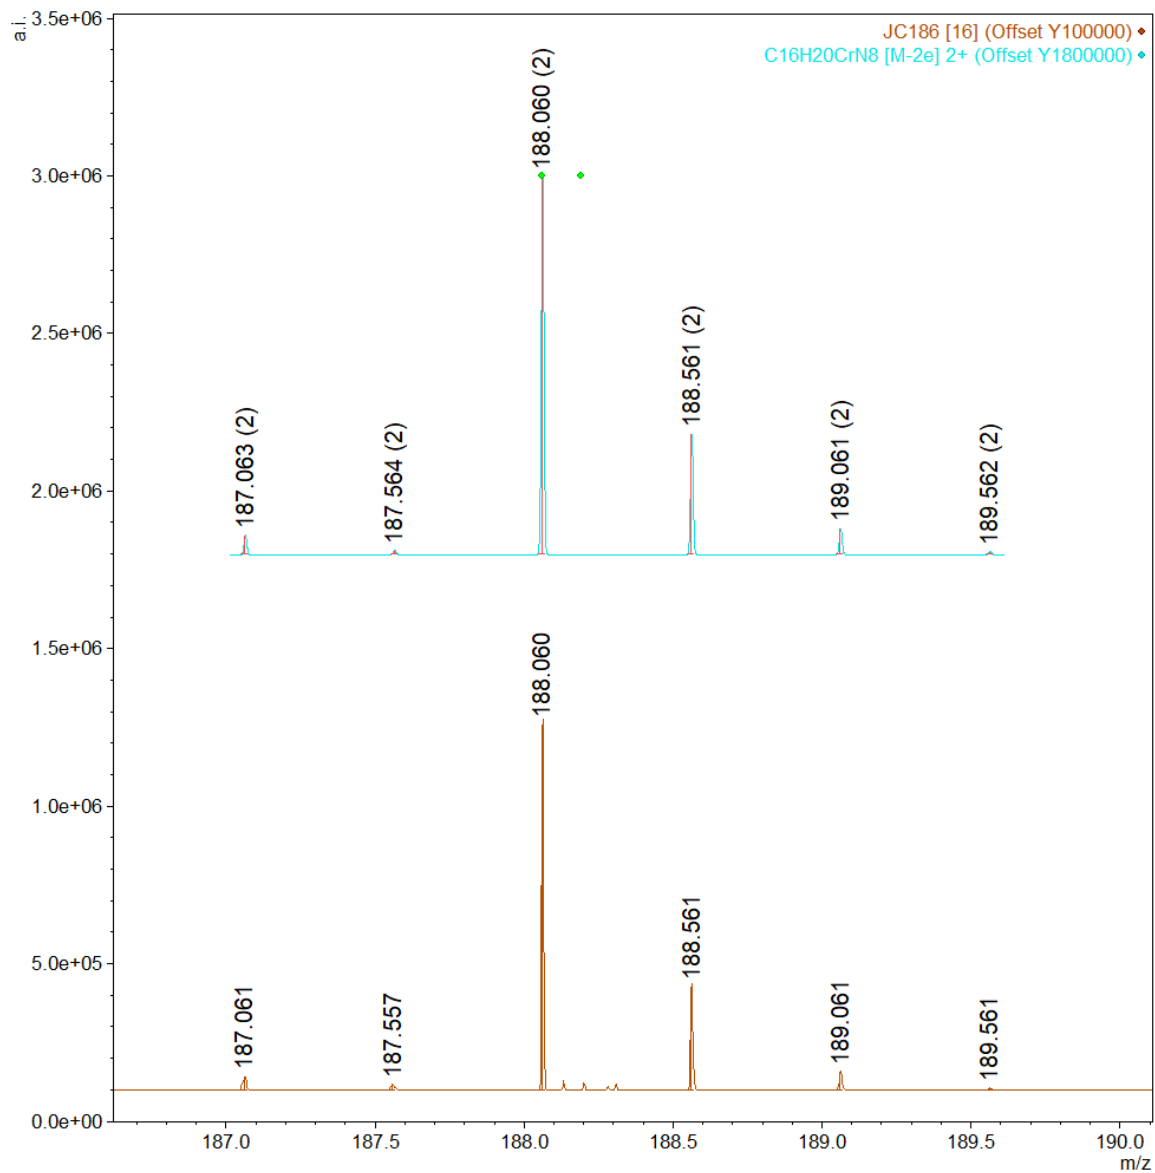

**Figure S31** Experimental ESI-MS spectrum of  $[\text{Cr}(\text{Me}_2\text{biim})_3](\text{CF}_3\text{SO}_3)_3$  in  $\text{CH}_3\text{CN}$  (red). Calculated peaks for  $[\text{Cr}(\text{Me}_2\text{biim})_2]^{2+}$ ,  $\text{C}_{16}\text{H}_{20}\text{CrN}_8^{2+}$  (cyan).

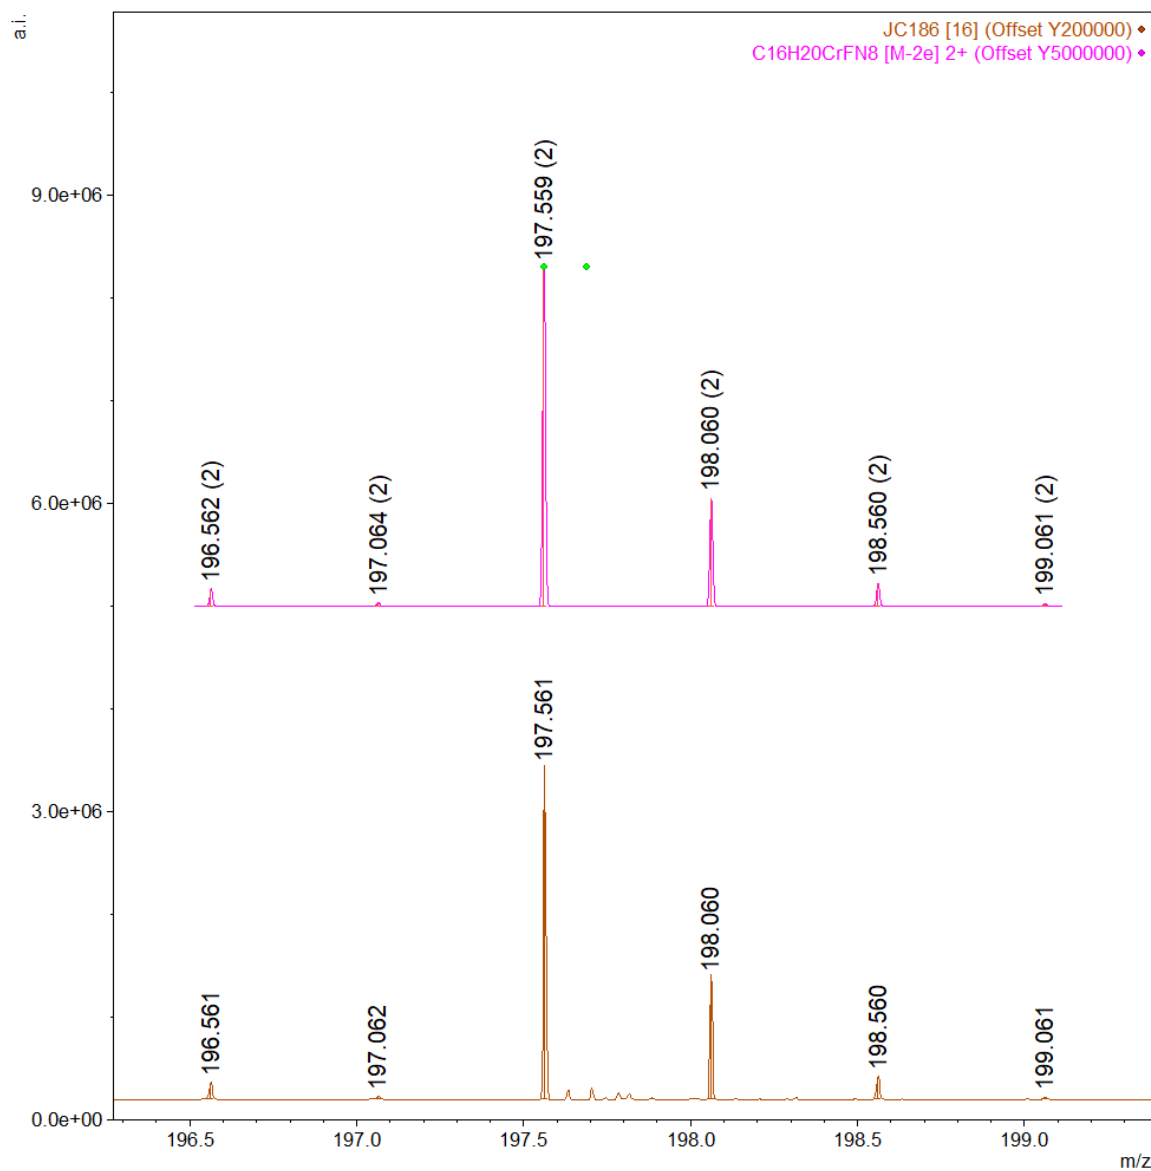

**Figure S32** Experimental ESI-MS spectrum of  $[\text{Cr}(\text{Me}_2\text{biim})_3](\text{CF}_3\text{SO}_3)_3$  in  $\text{CH}_3\text{CN}$  (red). Calculated peaks for  $[\text{Cr}(\text{Me}_2\text{biim})_2]^{3+} + \text{F}^-$ ,  $\text{C}_{16}\text{H}_{20}\text{CrFN}_8^{2+}$  (purple).

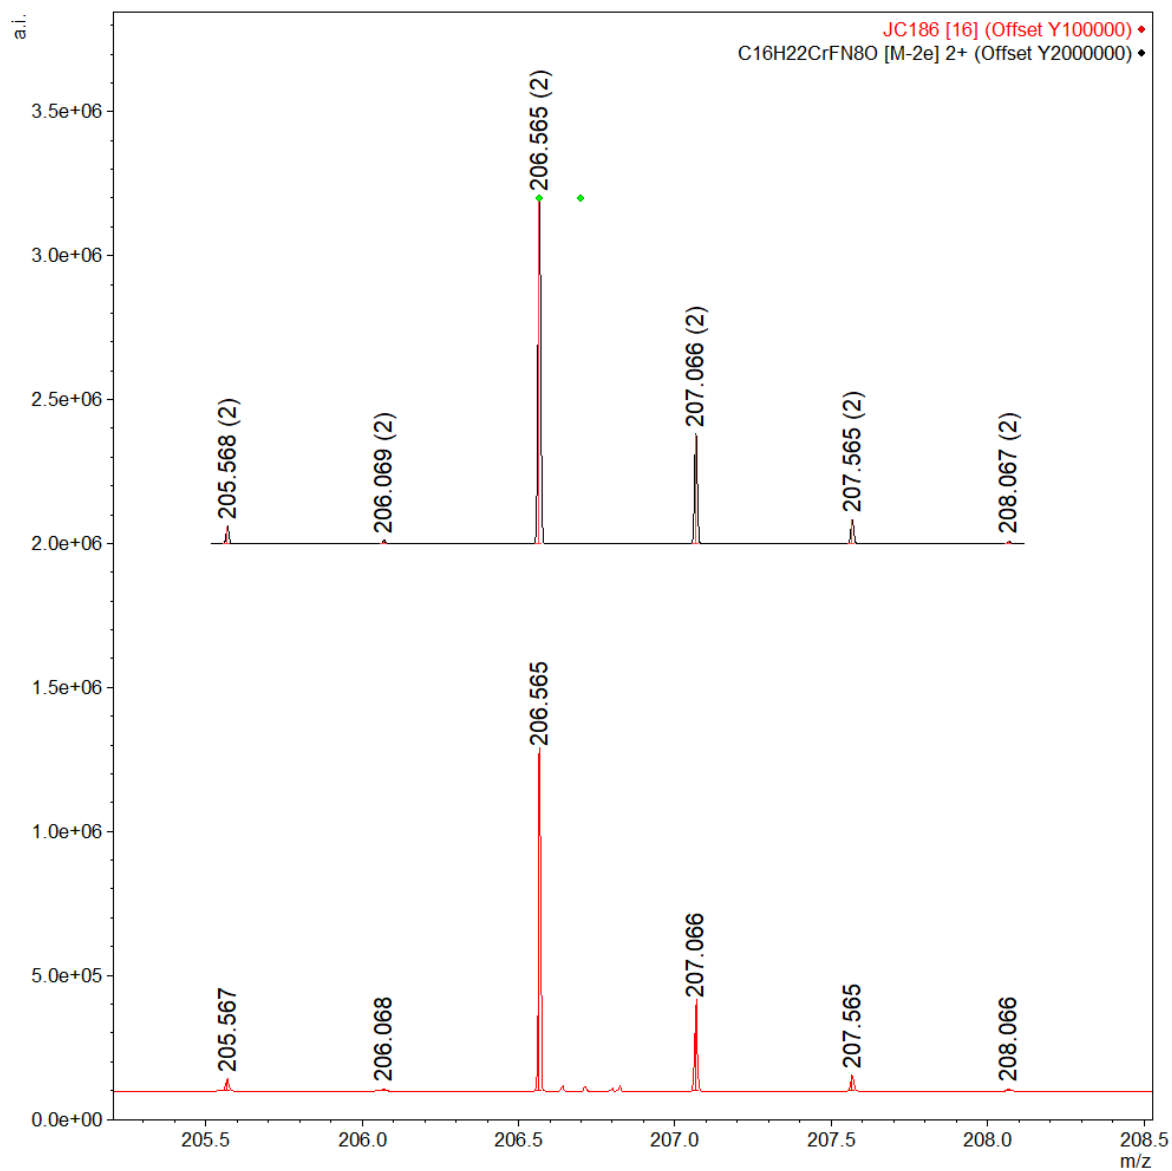

**Figure S33** Experimental ESI-MS spectrum of  $[\text{Cr}(\text{Me}_2\text{biim})_3](\text{CF}_3\text{SO}_3)_3$  in  $\text{CH}_3\text{CN}$  (red). Calculated peaks for  $[\text{Cr}(\text{Me}_2\text{biim})_2]^{3+} + \text{F}^- + \text{H}_2\text{O}$ ,  $\text{C}_{16}\text{H}_{22}\text{CrFN}_8\text{O}^{2+}$  (black).

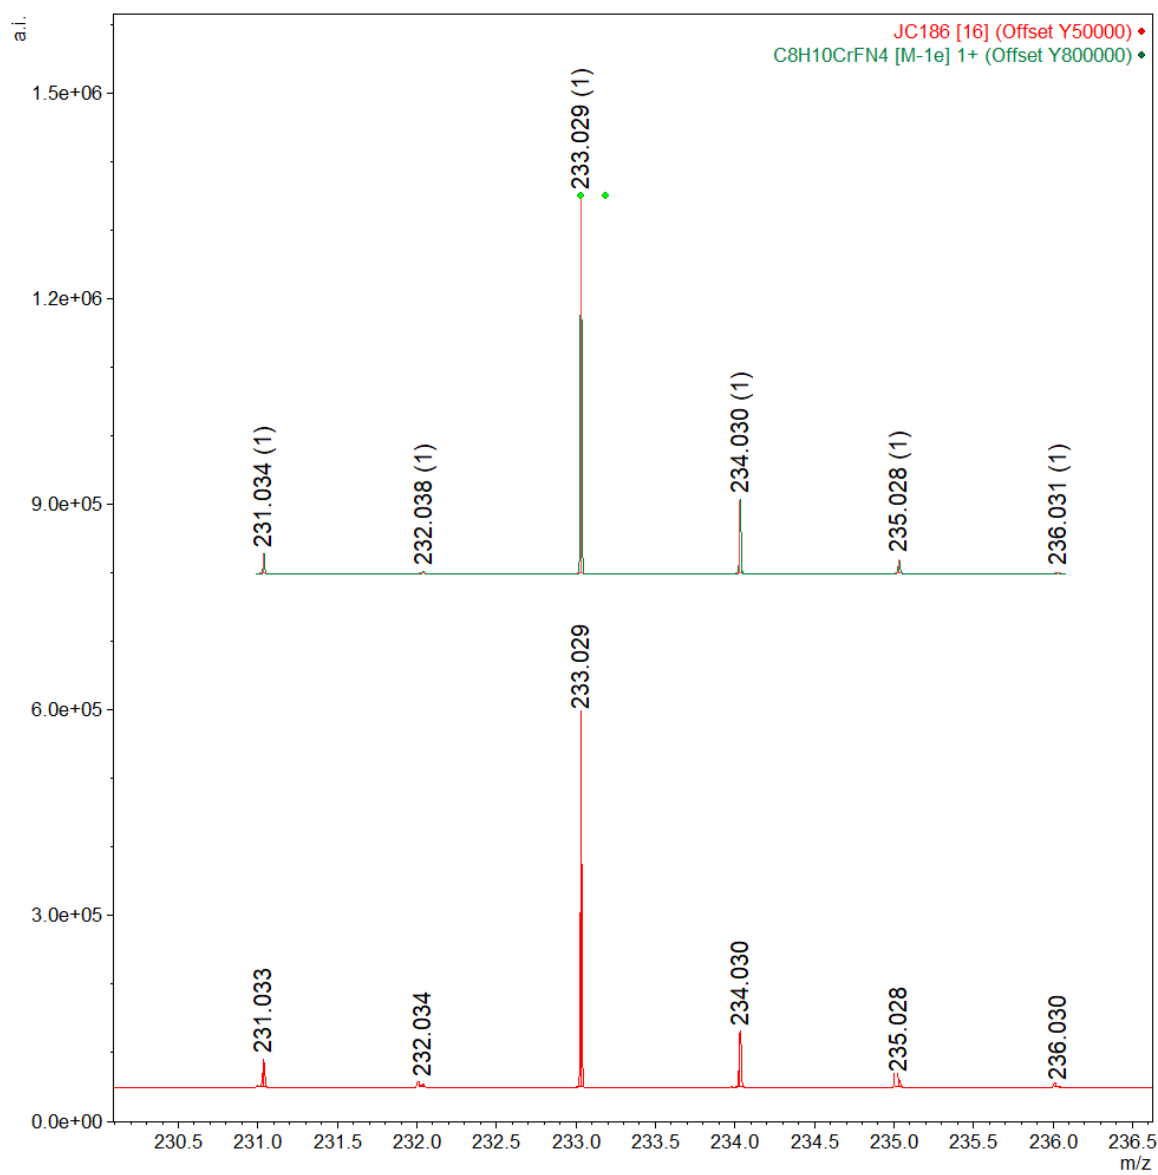

**Figure S34** Experimental ESI-MS spectrum of [Cr(Me<sub>2</sub>biim)<sub>3</sub>](CF<sub>3</sub>SO<sub>3</sub>)<sub>3</sub> in CH<sub>3</sub>CN (red). Calculated peaks for [Cr(Me<sub>2</sub>biim)]<sup>2+</sup> + F<sup>-</sup>, C<sub>8</sub>H<sub>10</sub>CrFN<sub>4</sub><sup>+</sup> (green).

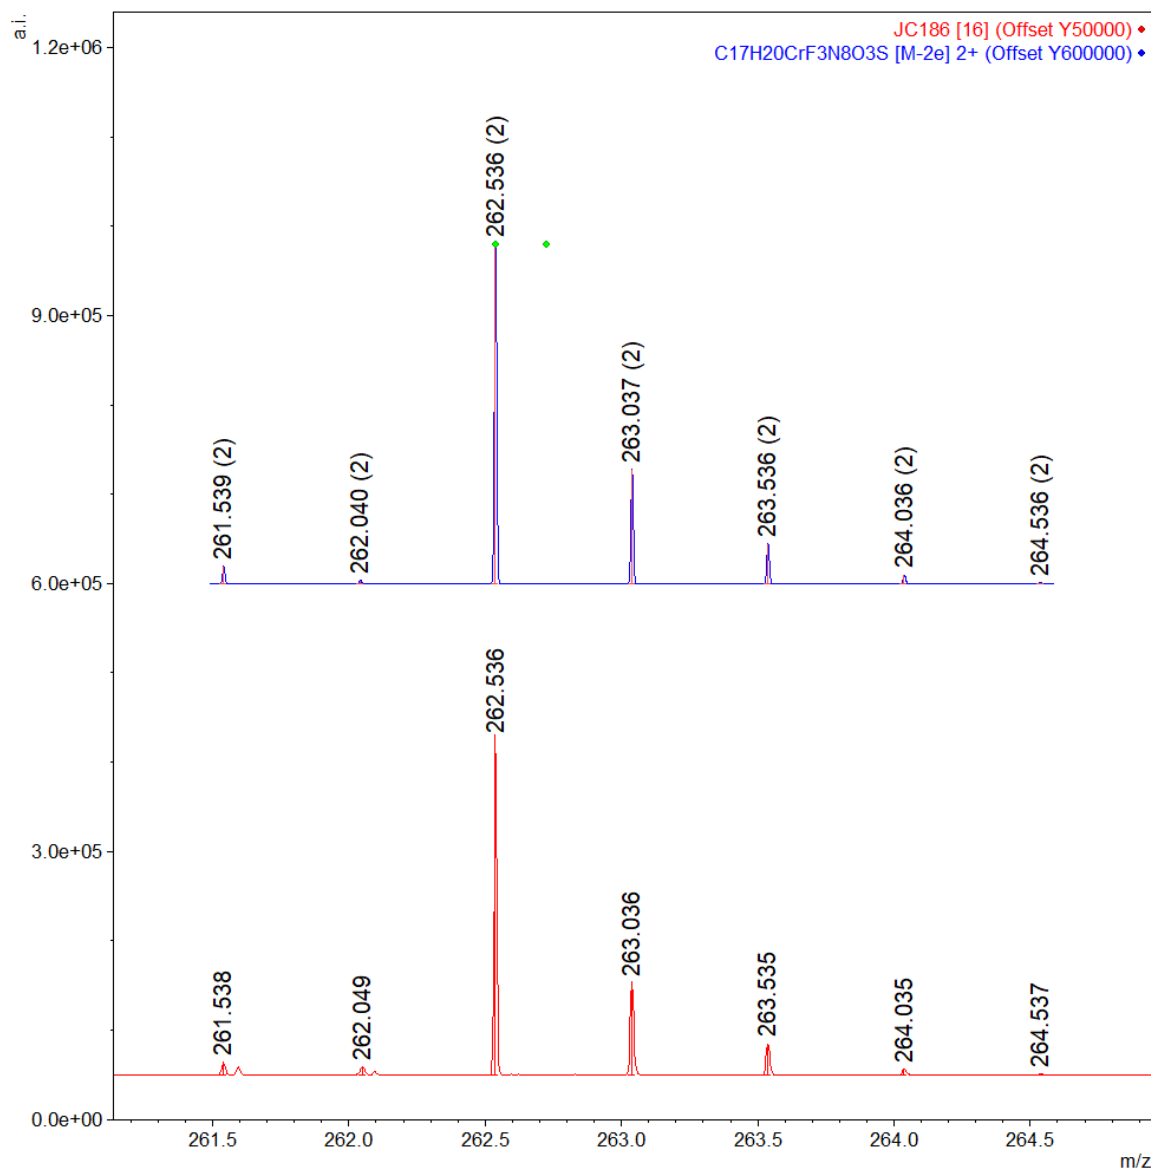

**Figure S35** Experimental ESI-MS spectrum of  $[\text{Cr}(\text{Me}_2\text{biim})_3](\text{CF}_3\text{SO}_3)_3$  in  $\text{CH}_3\text{CN}$  (red). Calculated peaks for  $[\text{Cr}(\text{Me}_2\text{biim})_2]^{3+} + \text{CF}_3\text{SO}_3^-$ ,  $\text{C}_{17}\text{H}_{20}\text{CrF}_3\text{N}_8\text{O}_3\text{S}^{2+}$  (blue).

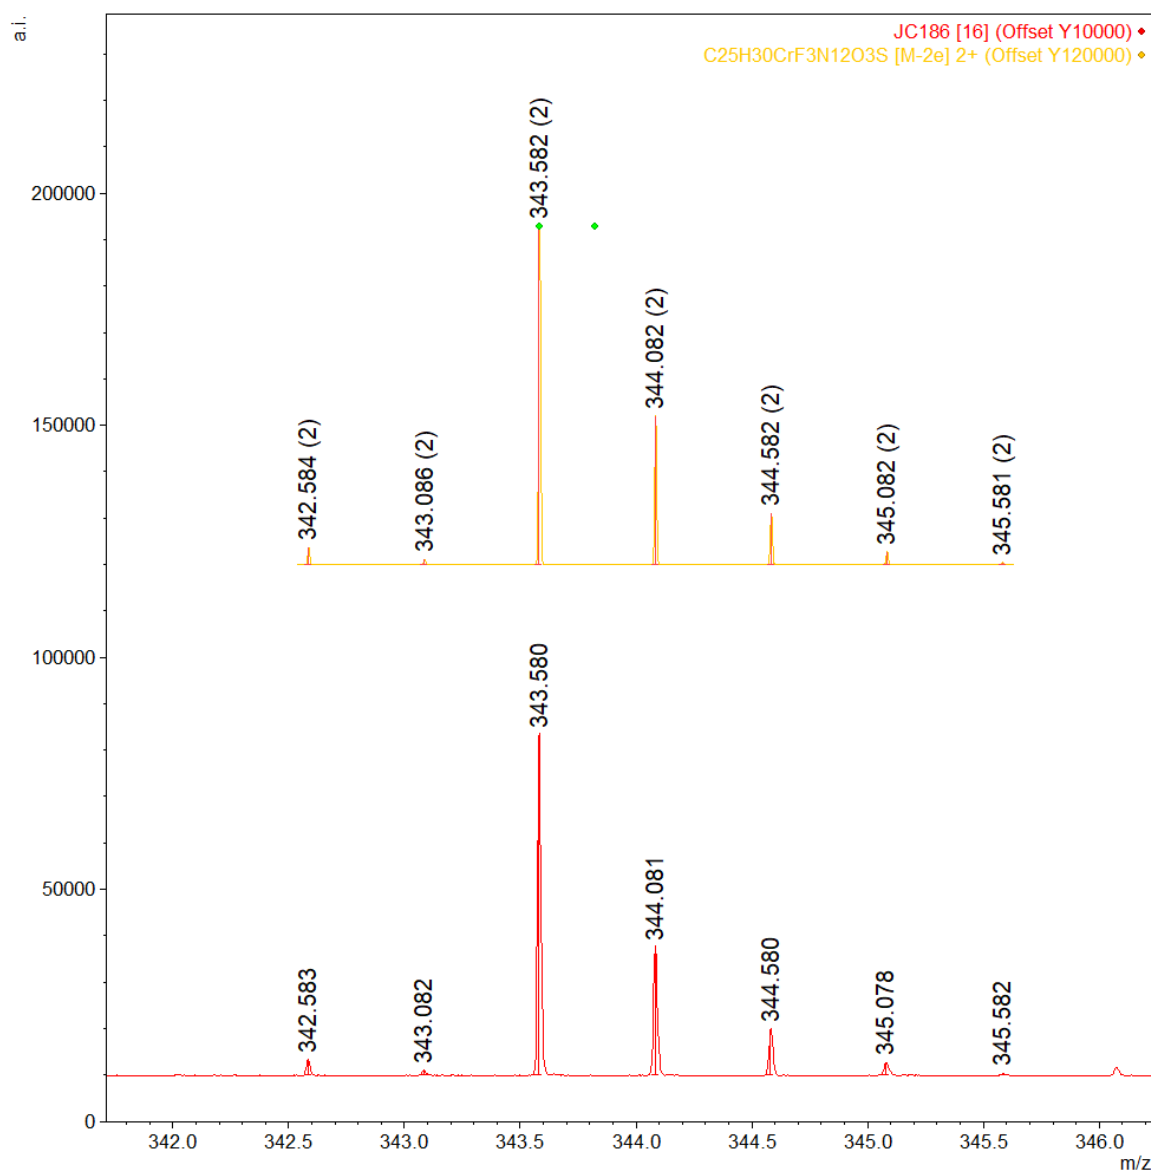

**Figure S36** Experimental ESI-MS spectrum of  $[\text{Cr}(\text{Me}_2\text{biim})_3](\text{CF}_3\text{SO}_3)_3$  in  $\text{CH}_3\text{CN}$  (red). Calculated peaks for  $[\text{Cr}(\text{Me}_2\text{biim})_3]^{3+} + \text{CF}_3\text{SO}_3^-$ ,  $\text{C}_{25}\text{H}_{30}\text{CrF}_3\text{N}_{12}\text{O}_3\text{S}^{2+}$  (orange).

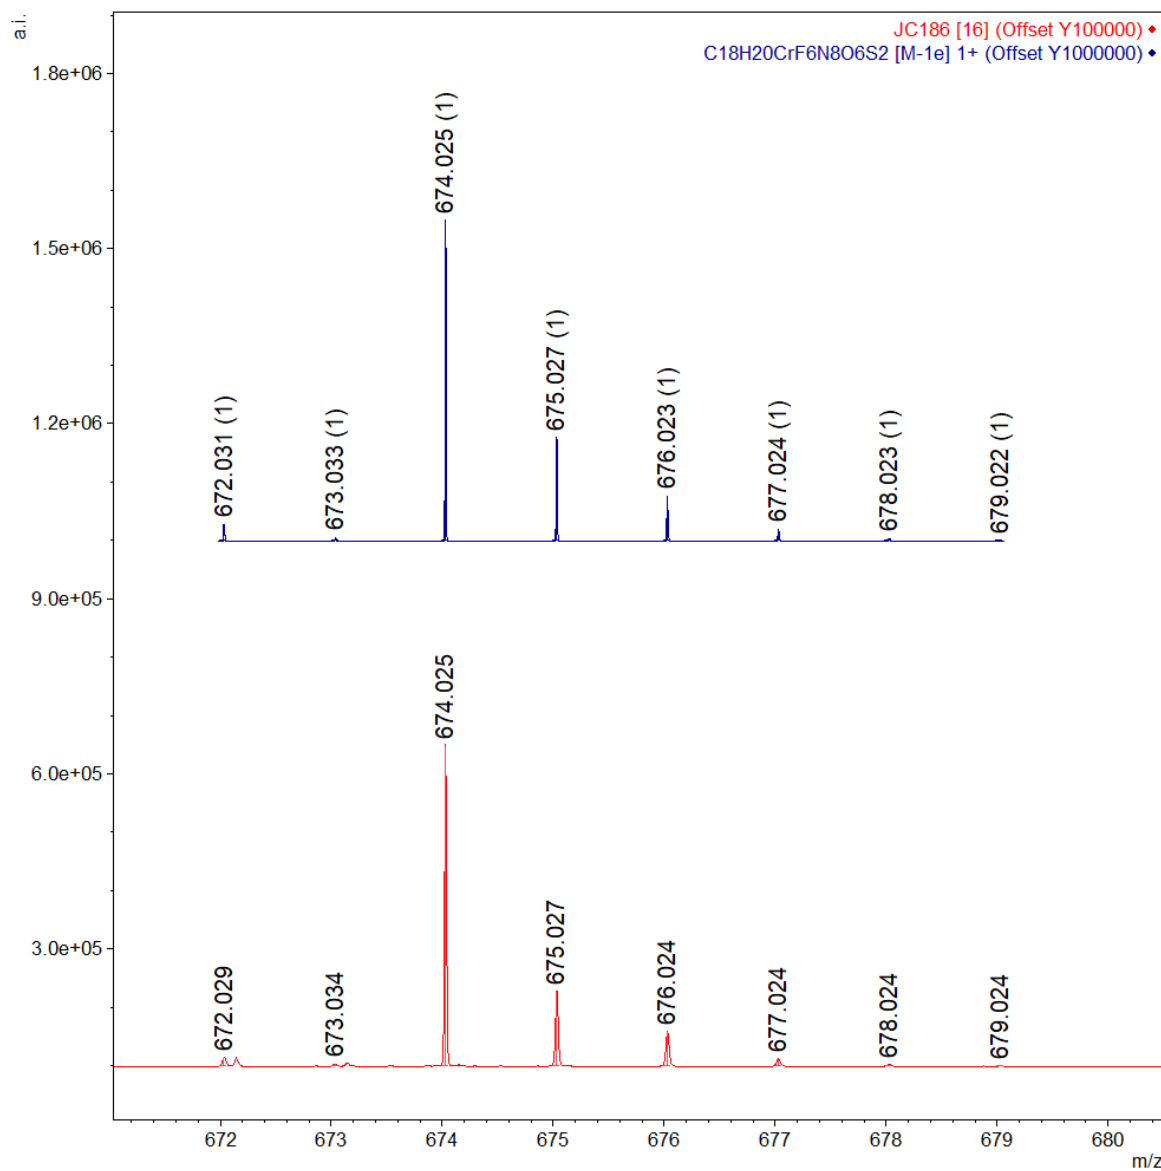

**Figure S37** Experimental ESI-MS spectrum of  $[\text{Cr}(\text{Me}_2\text{biim})_3](\text{CF}_3\text{SO}_3)_3$  in  $\text{CH}_3\text{CN}$  (red). Calculated peaks for  $[\text{Cr}(\text{Me}_2\text{biim})_2]^{3+} + 2\text{CF}_3\text{SO}_3^-$ ,  $\text{C}_{18}\text{H}_{20}\text{CrF}_6\text{N}_8\text{O}_6\text{S}_2^+$  (dark blue).



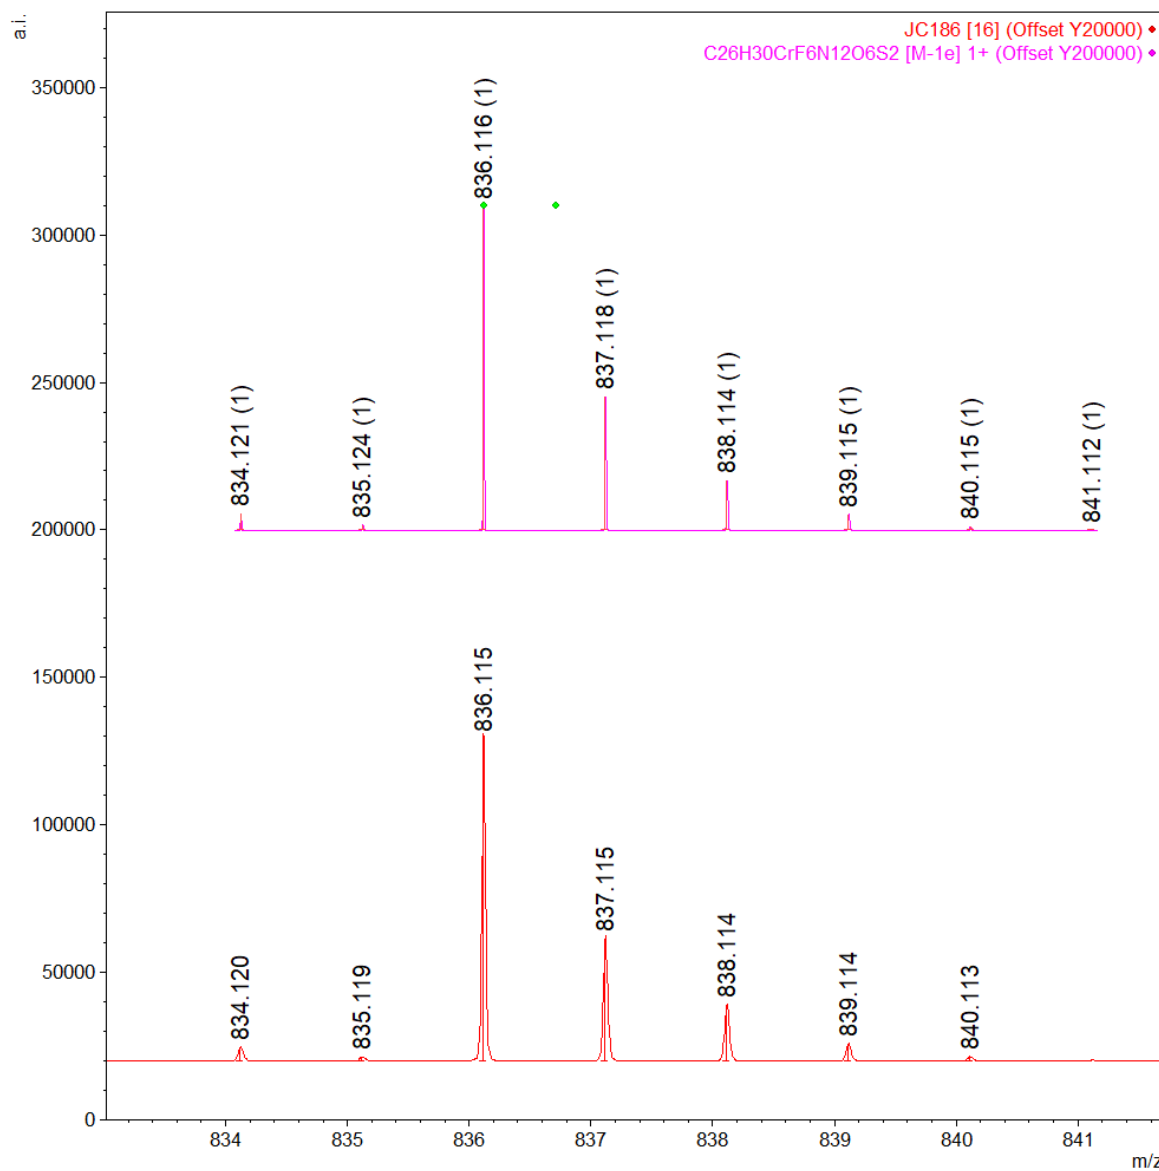

**Figure S38** Experimental ESI-MS spectrum of  $[\text{Cr}(\text{Me}_2\text{biim})_3](\text{CF}_3\text{SO}_3)_3$  in  $\text{CH}_3\text{CN}$  (red). Calculated peaks for  $[\text{Cr}(\text{Me}_2\text{biim})_3]^{3+} + 2\text{CF}_3\text{SO}_3^-$ ,  $\text{C}_{26}\text{H}_{30}\text{CrF}_6\text{N}_{12}\text{O}_6\text{S}_2^+$  (purple).

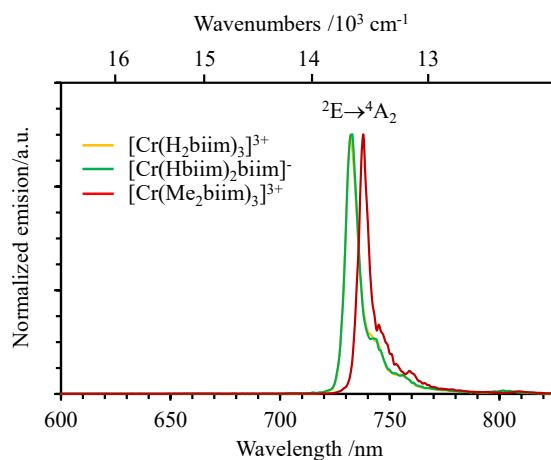

**Figure S39** NIR emission spectra ( $\lambda_{\text{exc}} = 330 \text{ nm}$ ) of complexes  $[\text{Cr}(\text{H}_2\text{biim})_3](\text{NO}_3)_3$  (orange),  $[\text{Cr}(\text{Hbiim})_2(\text{biim})]\text{PPh}_4$  (green) and  $[\text{Cr}(\text{Me}_2\text{biim})_3](\text{CF}_3\text{SO}_3)_3$  (red) in  $\text{MeOH}:\text{H}_2\text{O}$  (1:1) at 77 K.

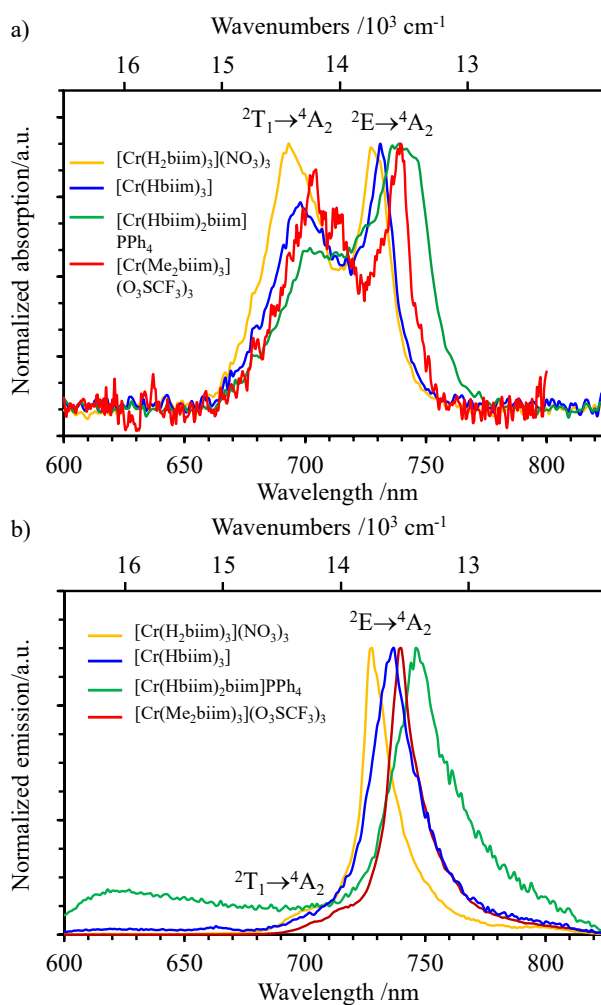

**Figure S40** NIR a) absorption and b) emission spectra ( $\lambda_{\text{exc}} = 330 \text{ nm}$ ) of complexes  $[\text{Cr}(\text{H}_2\text{biim})_3](\text{NO}_3)_3$  (orange),  $[\text{Cr}(\text{Hbiim})_2(\text{biim})]\text{PPh}_4$  (green),  $[\text{Cr}(\text{Me}_2\text{biim})_3](\text{CF}_3\text{SO}_3)_3$  (red) and  $[\text{Cr}(\text{H}_2\text{biim})_3]$  (blue) in the solid state at 293 K.

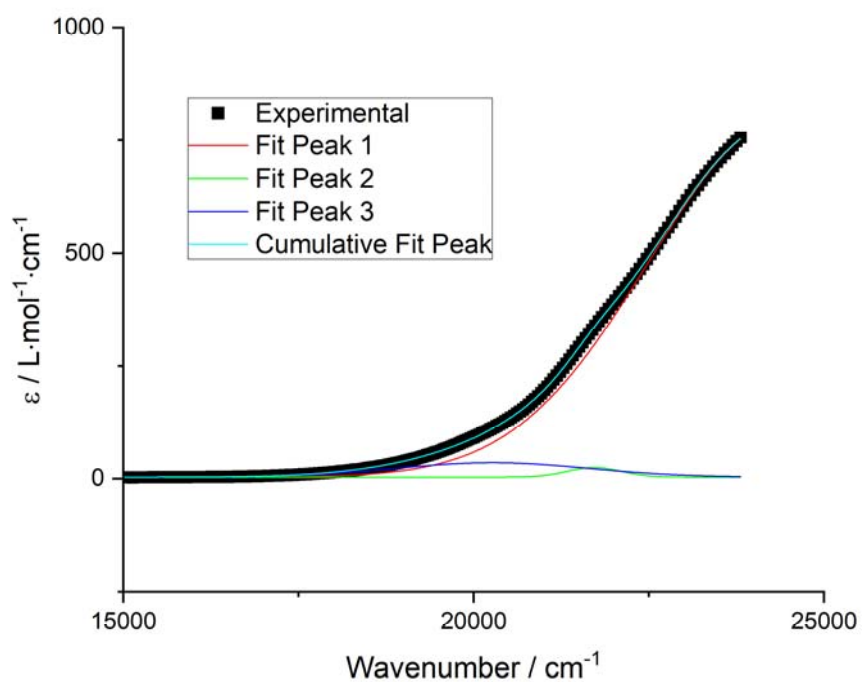

**Figure S41** Experimental absorption spectrum of  $[\text{Cr}(\text{H}_2\text{biim})_3](\text{NO}_3)_3$  in MeOH ( $3.09 \cdot 10^{-4}$  M) in the visible region showing the Gaussian deconvolution fit with 3 peaks. Peak 3 is attributed to the transition  ${}^4\text{T}_2 \leftarrow {}^4\text{A}_2$ .

**Table S36** Fitting parameters for the Gaussian deconvolution of the absorption spectrum of  $[\text{Cr}(\text{H}_2\text{biim})_3](\text{NO}_3)_3$  in MeOH.

| Model                                                       | Gaussian                                                                                            |                                   |                                   |
|-------------------------------------------------------------|-----------------------------------------------------------------------------------------------------|-----------------------------------|-----------------------------------|
| Equation                                                    | $y = y_0 + \frac{A}{w \sqrt{\frac{\pi}{4 \ln(2)}}} \cdot e^{-\frac{4 \ln(2) \cdot (x-x_c)^2}{w^2}}$ |                                   |                                   |
| Plot                                                        | Peak 1                                                                                              | Peak 2                            | Peak 3                            |
| $y_0 / \text{L} \cdot \text{mol}^{-1} \cdot \text{cm}^{-1}$ | 2.84                                                                                                | 2.84                              | 2.84                              |
| $x_c / \text{cm}^{-1}$                                      | $24406 \pm 22$                                                                                      | $21722 \pm 6$                     | $20268 \pm 106$                   |
| $A / \text{L} \cdot \text{mol}^{-1} \cdot \text{cm}^{-2}$   | $3.77\text{E}6 \pm 6.62\text{E}5$                                                                   | $2.06\text{E}4 \pm 1.12\text{E}3$ | $1.10\text{E}5 \pm 1.47\text{E}4$ |
| $W / \text{cm}^{-1}$                                        | $4512 \pm 64$                                                                                       | $907 \pm 24$                      | $3231 \pm 85$                     |
| Reduced Chi-square                                          | 0.42217                                                                                             |                                   |                                   |
| R-Square (COD)                                              | 0.99999                                                                                             |                                   |                                   |
| Adj. R-Square                                               | 0.99999                                                                                             |                                   |                                   |

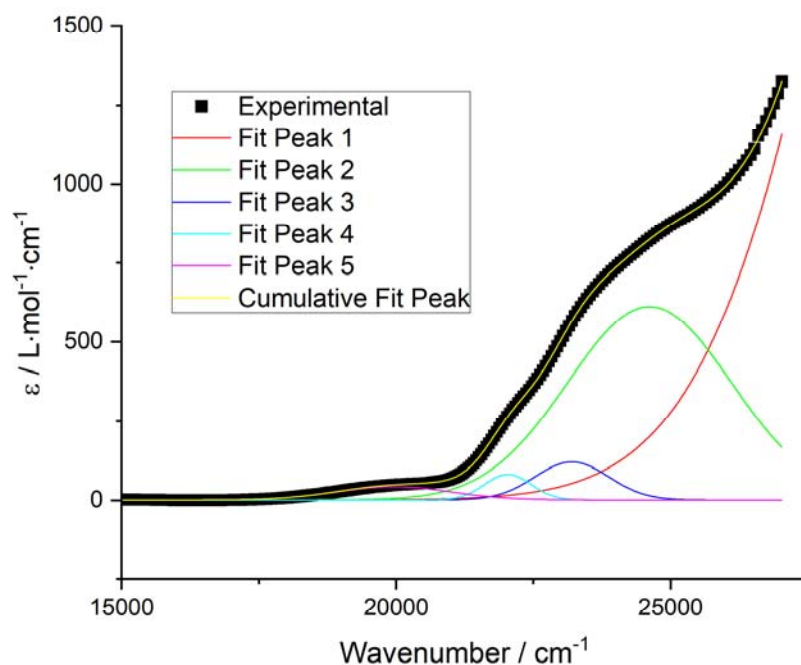

**Figure S42** Experimental absorption spectrum of  $[\text{Cr}(\text{Hbiim})_2(\text{biim})]\text{PPh}_4$  in MeOH ( $1.50 \cdot 10^{-4}$  M) in the visible region showing the Gaussian deconvolution fit with 5 peaks. Peak 5 is attributed to the transition  ${}^4\text{T}_2 \leftarrow {}^4\text{A}_2$ .

**Table S37** Fitting parameters for the Gaussian deconvolution of the absorption spectrum of  $[\text{Cr}(\text{Hbiim})_2(\text{biim})]\text{PPh}_4$  in MeOH.

| Model                                                       | Gaussian                                                                                            |                                   |                                   |                                   |                                   |
|-------------------------------------------------------------|-----------------------------------------------------------------------------------------------------|-----------------------------------|-----------------------------------|-----------------------------------|-----------------------------------|
| Equation                                                    | $y = y_0 + \frac{A}{w \sqrt{\frac{\pi}{4 \ln(2)}}} \cdot e^{-\frac{4 \ln(2) \cdot (x-x_c)^2}{w^2}}$ |                                   |                                   |                                   |                                   |
| Plot                                                        | Peak 1                                                                                              | Peak 2                            | Peak 3                            | Peak 4                            | Peak 5                            |
| $y_0 / \text{L} \cdot \text{mol}^{-1} \cdot \text{cm}^{-1}$ | 1.0                                                                                                 | 1.0                               | 1.0                               | 1.0                               | 1.0                               |
| $x_c / \text{cm}^{-1}$                                      | $32019 \pm 5270$                                                                                    | $24615 \pm 166$                   | $23201 \pm 12$                    | $22036 \pm 10$                    | $19956 \pm 40$                    |
| $A / \text{L} \cdot \text{mol}^{-1} \cdot \text{cm}^{-2}$   | $3.66\text{E}7 \pm 7.26\text{E}7$                                                                   | $2.29\text{E}4 \pm 7.22\text{E}5$ | $2.02\text{E}5 \pm 1.62\text{E}4$ | $8.57\text{E}4 \pm 6.70\text{E}3$ | $1.09\text{E}5 \pm 6.43\text{E}3$ |
| $W / \text{cm}^{-1}$                                        | $6873 \pm 4247$                                                                                     | $3524 \pm 241$                    | $1585 \pm 49$                     | $1004 \pm 24$                     | $2463 \pm 55$                     |
| Reduced Chi-square                                          | 1.4505                                                                                              |                                   |                                   |                                   |                                   |
| R-Square (COD)                                              | 0.99999                                                                                             |                                   |                                   |                                   |                                   |
| Adj. R-Square                                               | 0.99999                                                                                             |                                   |                                   |                                   |                                   |

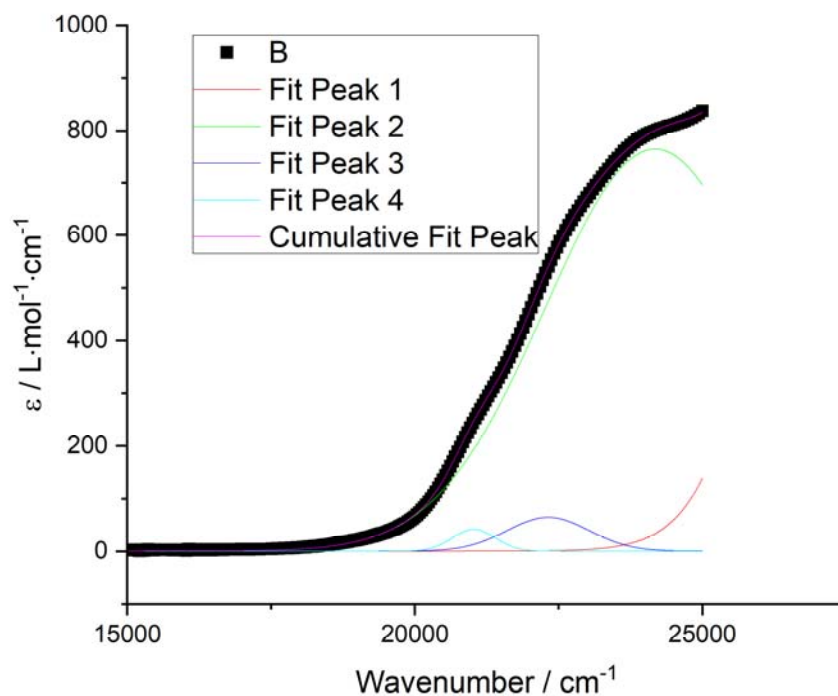

**Figure S43** Experimental absorption spectrum of  $[\text{Cr}(\text{Me}_2\text{biim})_3](\text{CF}_3\text{SO}_3)_3$  in MeOH ( $1.85 \cdot 10^{-4}$  M) in the visible region showing the Gaussian deconvolution fit with 4 peaks. Peak 4 is attributed to the transition  ${}^4\text{T}_2 \leftarrow {}^4\text{A}_2$ .

**Table S38** Fitting parameters for the Gaussian deconvolution of the absorption spectrum of  $[\text{Cr}(\text{Me}_2\text{biim})_3](\text{CF}_3\text{SO}_3)_3$  in MeOH.

| Model                                                       | Gaussian                                                                                            |                                   |                                   |                                   |
|-------------------------------------------------------------|-----------------------------------------------------------------------------------------------------|-----------------------------------|-----------------------------------|-----------------------------------|
| Equation                                                    | $y = y_0 + \frac{A}{w \sqrt{\frac{\pi}{4 \ln(2)}}} \cdot e^{\frac{-4 \ln(2) \cdot (x-x_c)^2}{w^2}}$ |                                   |                                   |                                   |
| Plot                                                        | Peak 1                                                                                              | Peak 2                            | Peak 3                            | Peak 4                            |
| $y_0 / \text{L} \cdot \text{mol}^{-1} \cdot \text{cm}^{-1}$ | 0                                                                                                   | 0                                 | 0                                 | 0                                 |
| $x_c / \text{cm}^{-1}$                                      | $30354 \pm 0$                                                                                       | $24176 \pm 10$                    | $22318 \pm 20$                    | $21026 \pm 16$                    |
| $A / \text{L} \cdot \text{mol}^{-1} \cdot \text{cm}^{-2}$   | $4.69\text{E}7 \pm 0$                                                                               | $3.64\text{E}6 \pm 7.40\text{E}3$ | $1.16\text{E}5 \pm 8.63\text{E}4$ | $3.94\text{E}4 \pm 3.31\text{E}3$ |
| $w / \text{cm}^{-1}$                                        | $4298 \pm 0$                                                                                        | $4475 \pm 13$                     | $1696 \pm 78$                     | $888 \pm 37$                      |
| Reduced Chi-square                                          | 5.94263                                                                                             |                                   |                                   |                                   |
| R-Square (COD)                                              | 0.99993                                                                                             |                                   |                                   |                                   |
| Adj. R-Square                                               | 0.99993                                                                                             |                                   |                                   |                                   |

**Table S39** Energy ( $x_c$ ), maximum absorption coefficient ( $\epsilon_{\max}$ ) and band width ( $w$ ) of the  $\text{Cr}(^4\text{T}_2 \leftarrow ^4\text{A}_2)$  transitions in  $[\text{Cr}(\text{H}_2\text{biim})_3](\text{NO}_3)_3$ ,  $[\text{Cr}(\text{Hbiim})_2(\text{biim})]\text{PPh}_4$  and  $[\text{Cr}(\text{Me}_2\text{biim})_3](\text{CF}_3\text{SO}_3)_3$ .

| Complex                                                                                             | $[\text{Cr}(\text{H}_2\text{biim})_3](\text{NO}_3)_3$ | $[\text{Cr}(\text{Hbiim})_2(\text{biim})]\text{PPh}_4$ | $[\text{Cr}(\text{Me}_2\text{biim})_3](\text{CF}_3\text{SO}_3)_3$ |
|-----------------------------------------------------------------------------------------------------|-------------------------------------------------------|--------------------------------------------------------|-------------------------------------------------------------------|
| $x_c (^4\text{A}_2 \rightarrow ^4\text{T}_2) / \text{cm}^{-1}$                                      | 20268                                                 | 19956                                                  | 21026                                                             |
| $\epsilon_{\max} (^4\text{A}_2 \rightarrow ^4\text{T}_2)$<br>$/ \text{M}^{-1} \cdot \text{cm}^{-1}$ | 32.0                                                  | 41.6                                                   | 41.7                                                              |
| $w / \text{cm}^{-1}$                                                                                | 3231                                                  | 2463                                                   | 888                                                               |

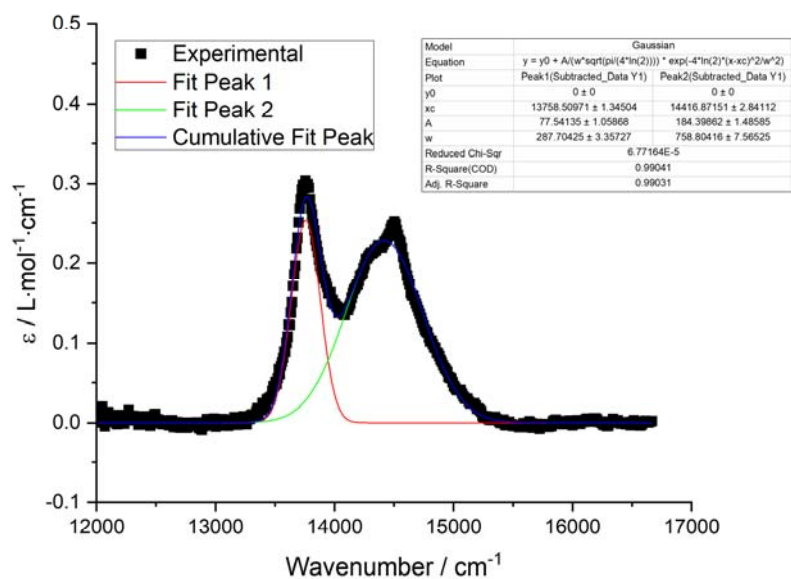

**Figure S44** Gaussian deconvolution of the absorption spectrum of  $[\text{Cr}(\text{H}_2\text{biim})_3](\text{NO}_3)_3$  in  $\text{H}_2\text{O}$ ,  $c = 1.22 \cdot 10^{-2}$  M.

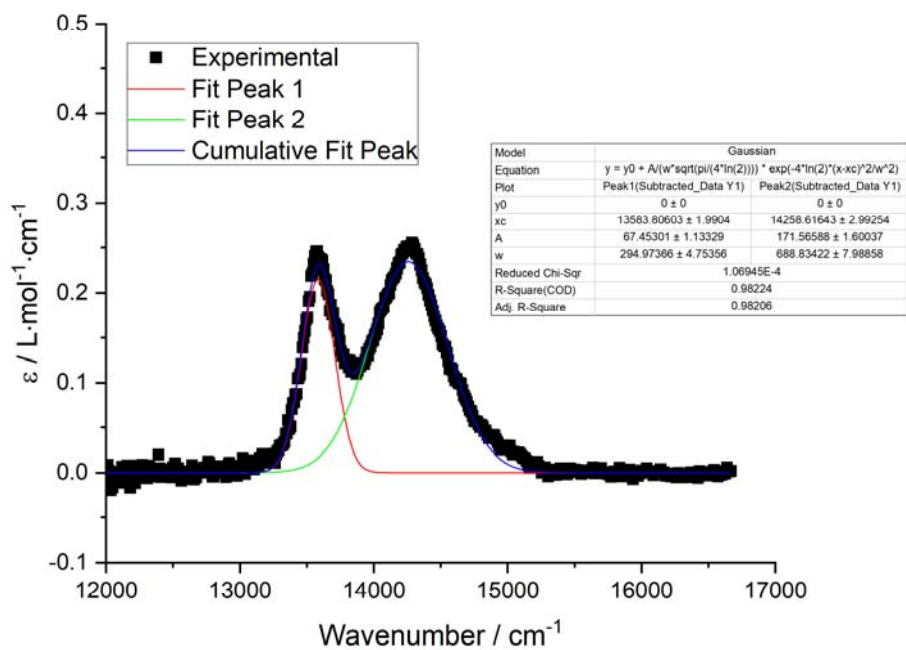

**Figure S45** Gaussian deconvolution of the absorption spectrum of  $[\text{Cr}(\text{Me}_2\text{biim})_3](\text{CF}_3\text{SO}_3)_3$  in  $\text{CH}_3\text{CN}$ ,  $c = 8.93 \cdot 10^{-3}$  M.

**Table S40** Energies  $\tilde{\nu}$  obtained with the Gaussian deconvolution of the absorption spectra in solution and radiative rate constant  $k_{\text{rad}}$  obtained with equation for  $[\text{Cr}(\text{H}_2\text{biim})_3](\text{NO}_3)_3$  and  $[\text{Cr}(\text{Me}_2\text{biim})_3](\text{CF}_3\text{SO}_3)_3$  together with a selection of complexes reported in literature.<sup>a</sup>

| Complex                                                                       | $\tilde{\nu}(^2\text{E}) / \text{cm}^{-1}$ | $\tilde{\nu}(^2\text{T}_1) / \text{cm}^{-1}$ | $\epsilon_{\text{max}}(^2\text{E}) / \text{M}^{-1}\cdot\text{cm}^{-1}$ | $\epsilon_{\text{max}}(^2\text{T}_1) / \text{M}^{-1}\cdot\text{cm}^{-1}$ | $k_{\text{rad}}(^2\text{E}) / \text{s}^{-1}$ | $k_{\text{rad}}(^2\text{T}_1) / \text{s}^{-1}$ | Ref.      |
|-------------------------------------------------------------------------------|--------------------------------------------|----------------------------------------------|------------------------------------------------------------------------|--------------------------------------------------------------------------|----------------------------------------------|------------------------------------------------|-----------|
| $[\text{Cr}(\text{H}_2\text{biim})_3](\text{NO}_3)_3$                         | 13758                                      | 14416                                        | 0.27                                                                   | 0.22                                                                     | 75                                           | 119                                            | This work |
| $[\text{Cr}(\text{Me}_2\text{biim})_3](\text{CF}_3\text{SO}_3)_3$             | 13583                                      | 14258                                        | 0.24                                                                   | 0.25                                                                     | 73                                           | 123                                            | This work |
| $[\text{Cr}(\text{phen})_2(\text{H}_2\text{biim})](\text{CF}_3\text{SO}_3)_3$ | 13723                                      | 14381                                        | 0.19                                                                   | 0.27                                                                     | 65                                           | 135                                            | This work |
| $[\text{Cr}(\text{phen})_2(\text{phen-bbzpy})](\text{CF}_3\text{SO}_3)_3$     | 13725                                      | 14492                                        | 0.16                                                                   | 0.17                                                                     | 33                                           | 43                                             | 21        |
| $[\text{Cr}(\text{dqp})_2](\text{CF}_3\text{SO}_3)_3$                         | 13354                                      | 13758                                        | 0.1                                                                    | 0.58                                                                     | 30                                           | 89                                             | 24,76     |
| $[\text{Cr}(\text{dqp-OMe})_2](\text{CF}_3\text{SO}_3)_3$                     | 13113                                      | 13702                                        | 0.07                                                                   | 0.32                                                                     | 31                                           | 110                                            | 77        |
| $[\text{Cr}(\text{dqp-Br})_2](\text{CF}_3\text{SO}_3)_3$                      | 13271                                      | 13730                                        | 0.09                                                                   | 0.32                                                                     | 34                                           | 77                                             | 77        |
| $[\text{Cr}(\text{dqp-CCH})_2](\text{CF}_3\text{SO}_3)_3$                     | 13290                                      | 13710                                        | 0.14                                                                   | 0.43                                                                     | 29                                           | 88                                             | 77        |
| $[\text{Cr}(\text{dqp})(\text{tpy})](\text{CF}_3\text{SO}_3)_3$               | 13351                                      | 14326                                        | 0.15                                                                   | 0.18                                                                     | 55                                           | 58                                             | 76        |
| $[\text{Cr}(\text{ddpd})(\text{dqp})](\text{CF}_3\text{SO}_3)_3$              | 13097                                      | 13661                                        | 0.23                                                                   | 0.30                                                                     | 63                                           | 91                                             | 76        |
| $[\text{Cr}(\text{dqp})(\text{dqp-OMe})](\text{CF}_3\text{SO}_3)_3$           | 13280                                      | 13755                                        | 0.06                                                                   | 0.34                                                                     | 11                                           | 62                                             | 76        |

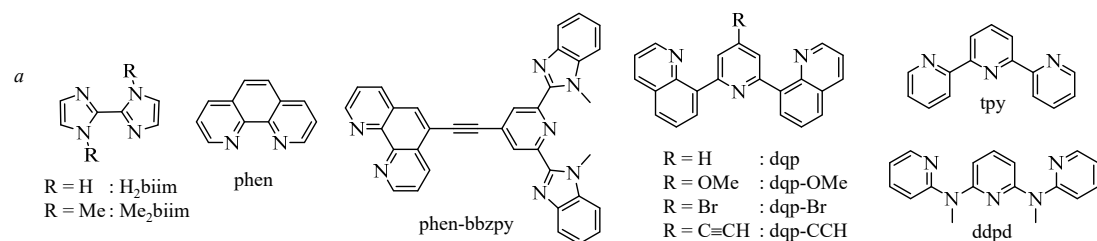



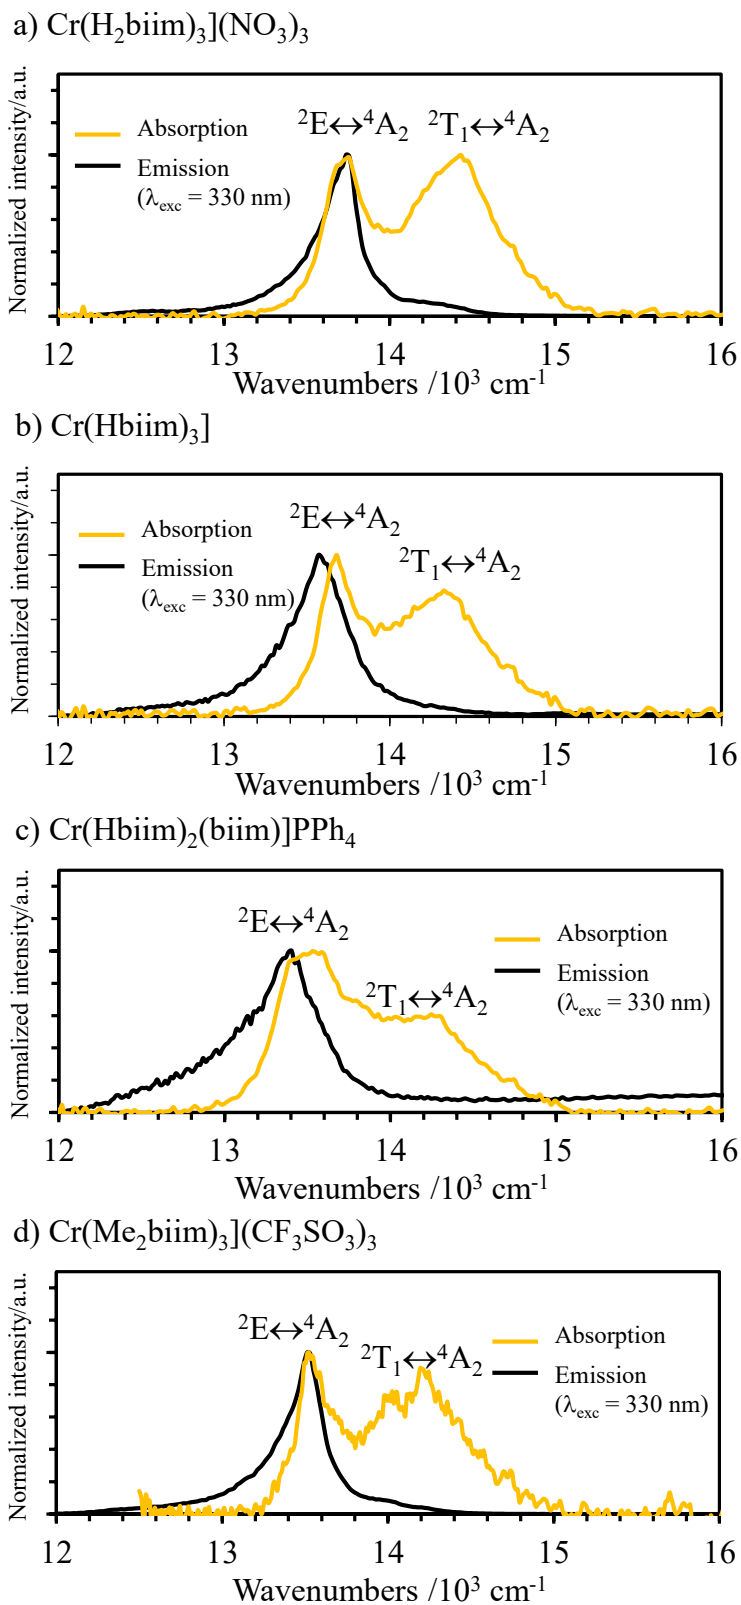

**Figure S46** Overlay of NIR absorption and emission spectra of a)  $[\text{Cr}(\text{H}_2\text{biim})_3](\text{NO}_3)_3$ , b)  $[\text{Cr}(\text{Hbiim})_3]$ , c)  $[\text{Cr}(\text{Hbiim})_2(\text{biim})](\text{PPh}_4)$  and d)  $[\text{Cr}(\text{Me}_2\text{biim})_3](\text{CF}_3\text{SO}_3)_3$  in the solid state at 293 K.

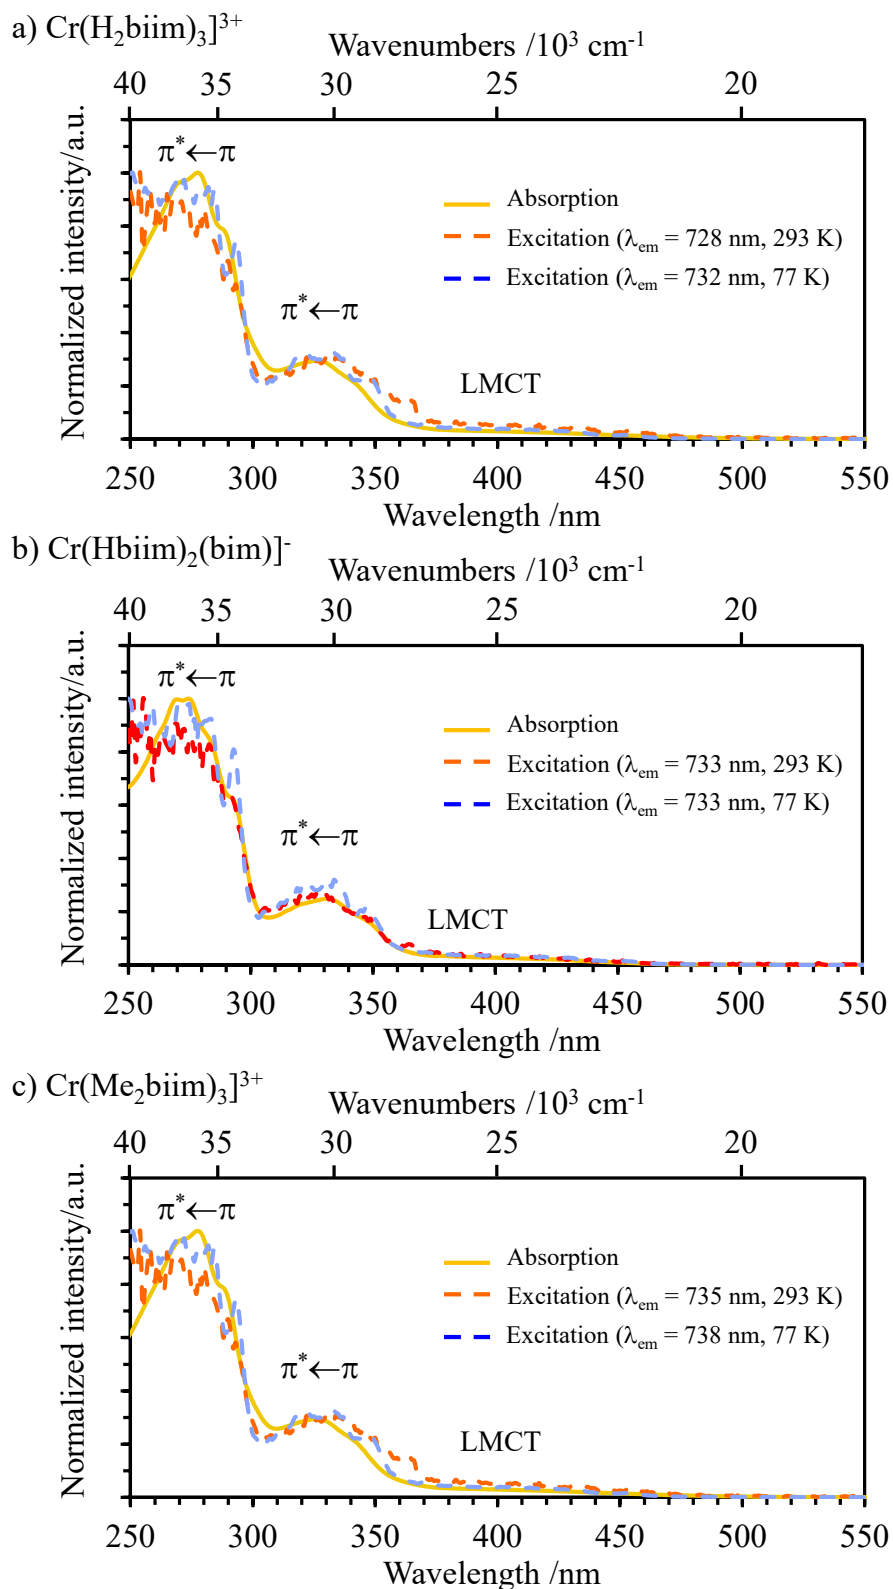

**Figure S47** Overlay of absorption (MeOH) and excitation (MeOH at 293 K, MeOH:H<sub>2</sub>O 1:1 at 77 K) spectra of a)  $[\text{Cr}(\text{H}_2\text{biim})_3](\text{NO}_3)_3$ , b)  $[\text{Cr}(\text{Hbiim})_2(\text{bim})](\text{PPh}_4)$  and c)  $[\text{Cr}(\text{Me}_2\text{biim})_3](\text{CF}_3\text{SO}_3)_3$ .

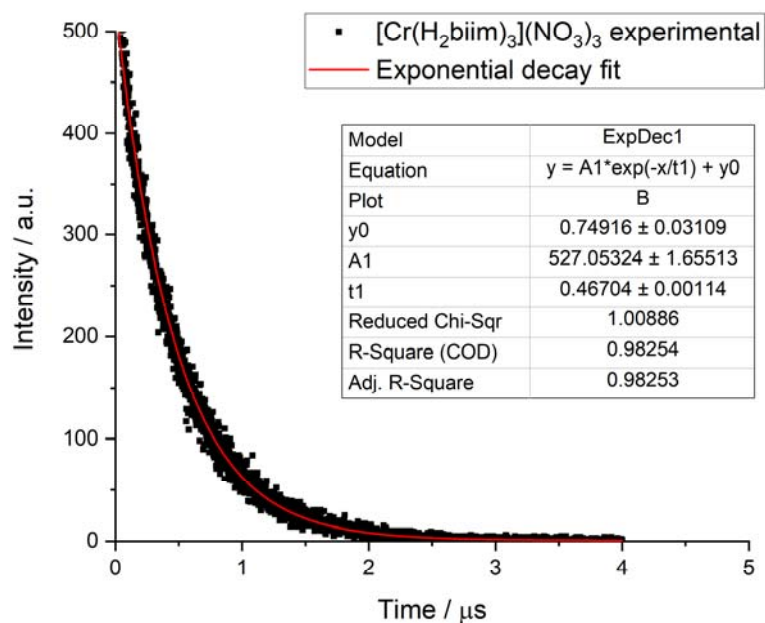

**Figure S48** Emission decay curve as function of time for the emission of  $\text{Cr}(^2\text{E} \rightarrow ^4\text{A}_2)$  transition of  $[\text{Cr}(\text{H}_2\text{biim})_3](\text{NO}_3)_3$  in MeOH at 293K in deaerated solutions.  $\lambda_{\text{exc}} = 355 \text{ nm}$ ;  $\lambda_{\text{em}} = 728 \text{ nm}$ .

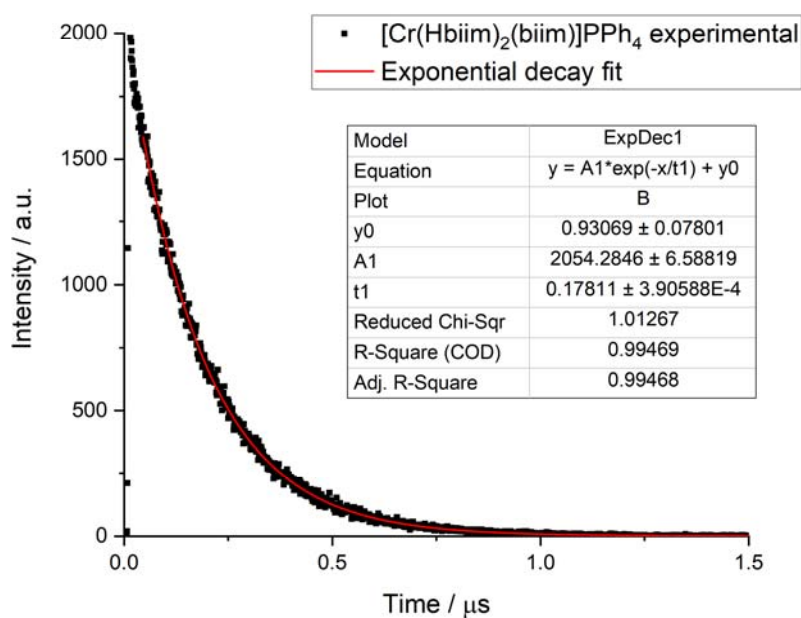

**Figure S49** Emission decay curve as function of time for the emission of  $\text{Cr}(^2\text{E} \rightarrow ^4\text{A}_2)$  transition of  $[\text{Cr}(\text{Hbiim})_2(\text{biim})](\text{PPh}_4)$  in MeOH at 293K in deaerated solutions.  $\lambda_{\text{exc}} = 355 \text{ nm}$ ;  $\lambda_{\text{em}} = 733 \text{ nm}$ .

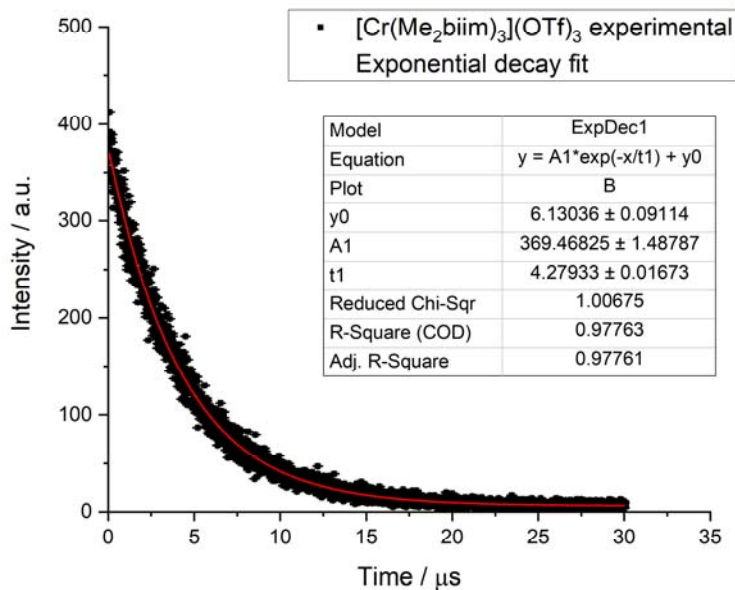

**Figure S50** Emission decay curve as function of time for the emission of  $\text{Cr}(^2\text{E} \rightarrow ^4\text{A}_2)$  transition of  $[\text{Cr}(\text{Me}_2\text{biim})(\text{CF}_3\text{SO}_3)_3]$  in MeOH at 293K in deaerated solutions.  $\lambda_{\text{exc}} = 355 \text{ nm}$  ;  $\lambda_{\text{emi}} = 738 \text{ nm}$ .

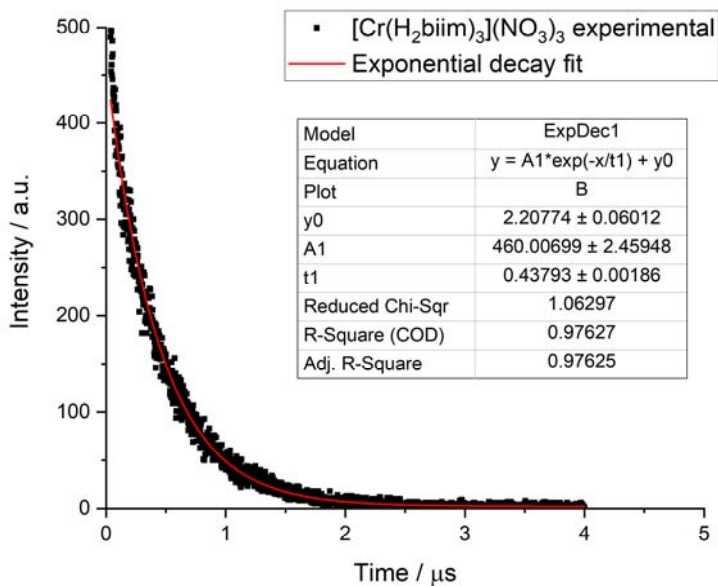

**Figure S51** Emission decay curve as function of time for the emission of  $\text{Cr}(^2\text{E} \rightarrow ^4\text{A}_2)$  transition of  $[\text{Cr}(\text{H}_2\text{biim})_3](\text{NO}_3)_3$  in MeOH at 293K in air-equilibrated solutions.  $\lambda_{\text{exc}} = 355 \text{ nm}$  ;  $\lambda_{\text{em}} = 728 \text{ nm}$ .

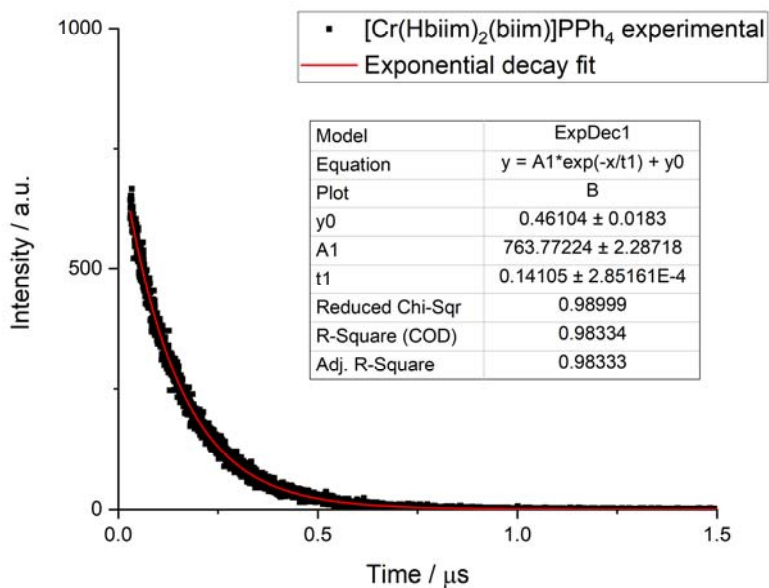

**Figure S52** Emission decay curve as function of time for the emission of  $\text{Cr}(^2\text{E} \rightarrow ^4\text{A}_2)$  transition of  $[\text{Cr}(\text{Hbiim})_2(\text{biim})](\text{PPh}_4)$  in MeOH at 293K in air-equilibrated solutions.  $\lambda_{\text{exc}} = 355 \text{ nm}$  ;  $\lambda_{\text{em}} = 733 \text{ nm}$ .

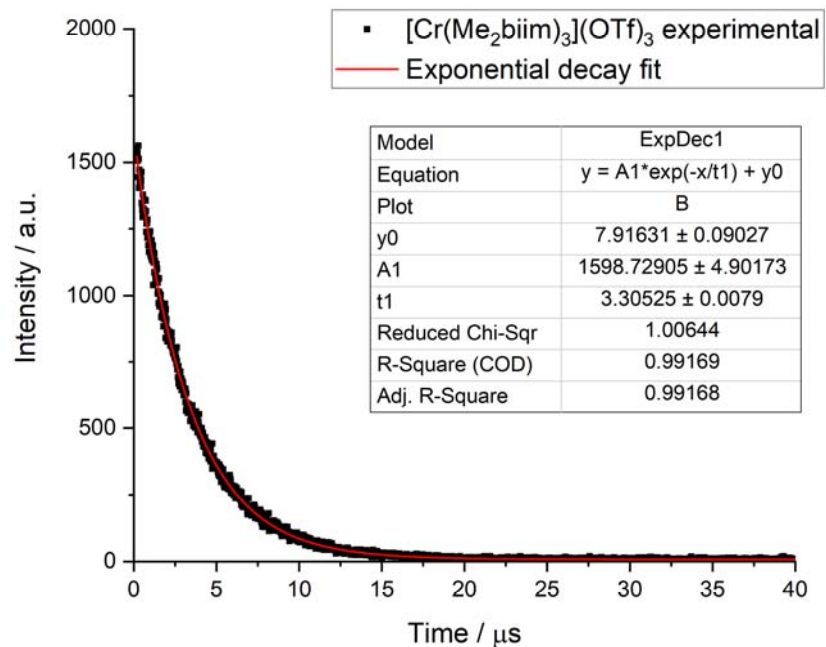

**Figure S53** Emission decay curve as function of time for the emission of  $\text{Cr}(^2\text{E} \rightarrow ^4\text{A}_2)$  transition of  $[\text{Cr}(\text{Me}_2\text{biim})_3](\text{CF}_3\text{SO}_3)_3$  in MeOH at 293K in air-equilibrated solutions.  $\lambda_{\text{exc}} = 355 \text{ nm}$  ;  $\lambda_{\text{em}} = 738 \text{ nm}$ .

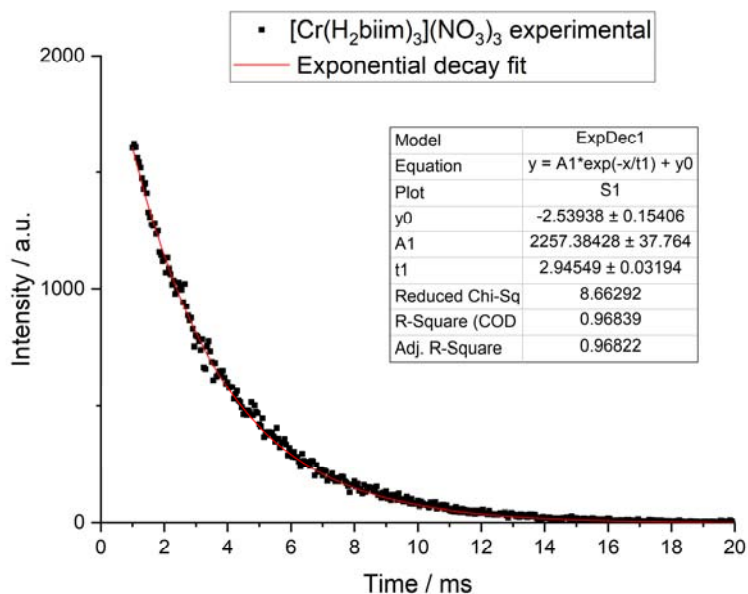

**Figure S54** Emission decay curve as function of time for the emission of  $\text{Cr}(^2\text{E} \rightarrow ^4\text{A}_2)$  transition of  $[\text{Cr}(\text{H}_2\text{biim})_3](\text{NO}_3)_3$  in MeOH/H<sub>2</sub>O (1:1) at 77 K.  $\lambda_{\text{exc}} = 330 \text{ nm}$  ;  $\lambda_{\text{em}} = 732 \text{ nm}$ .

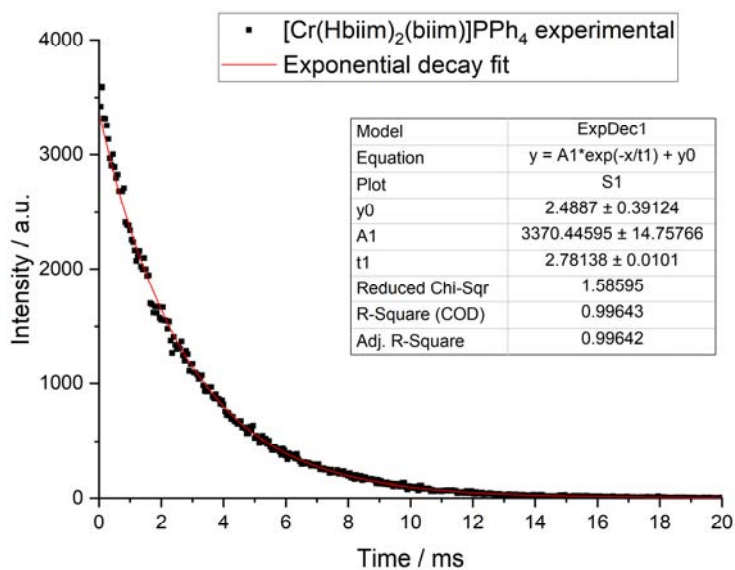

**Figure S55** Emission decay curve as function of time for the emission of  $\text{Cr}(^2\text{E} \rightarrow ^4\text{A}_2)$  transition of  $[\text{Cr}(\text{Hbiim})_2(\text{biim})](\text{PPh}_4)$  in MeOH/H<sub>2</sub>O (1:1) at 77 K.  $\lambda_{\text{exc}} = 330 \text{ nm}$  ;  $\lambda_{\text{em}} = 733 \text{ nm}$ .

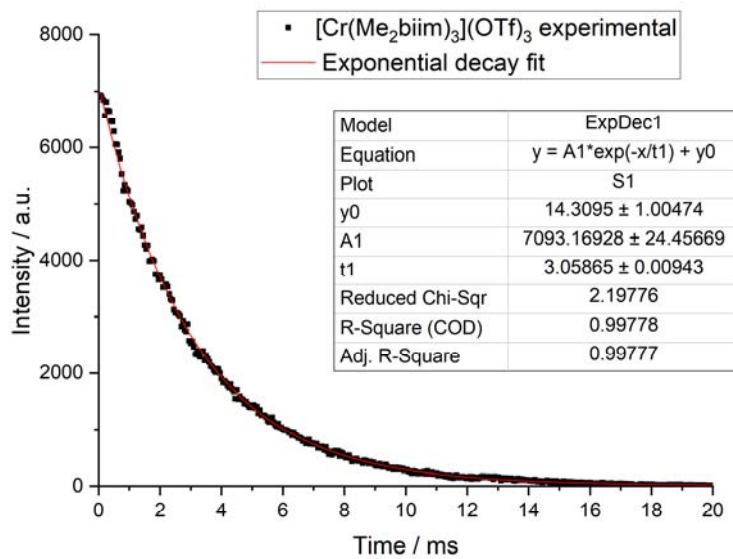

**Figure S56** Emission decay curve as function of time for the emission of  $Cr(^2E \rightarrow ^4A_2)$  transition of  $[Cr(Me_2biim)(CF_3SO_3)_3]$  in MeOH/H<sub>2</sub>O (1:1) at 77 K.  $\lambda_{exc} = 330$  nm ;  $\lambda_{em} = 738$  nm.

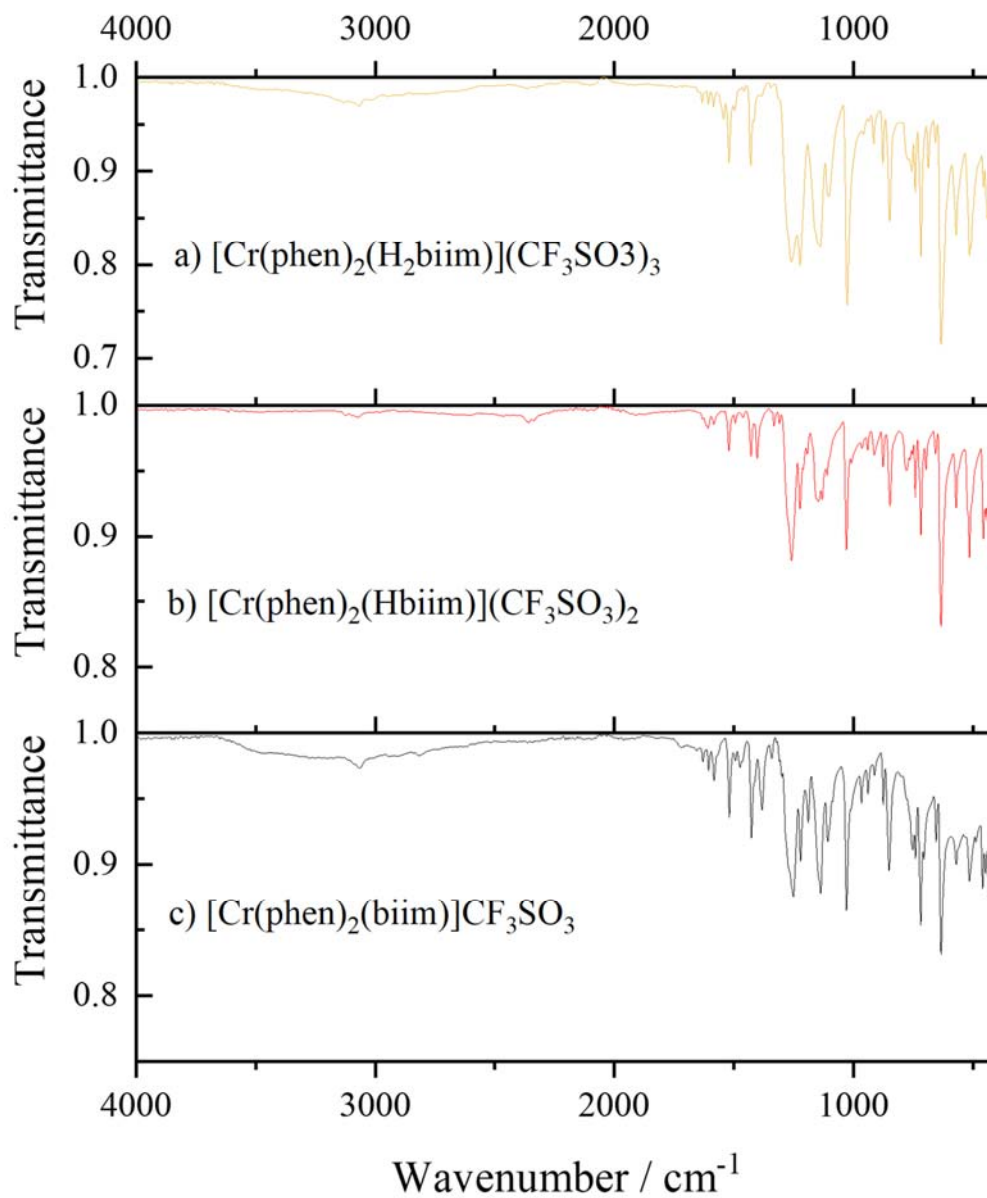

**Figure S57** Stacked solid state FT-IR spectrum of a)  $[\text{Cr}(\text{phen})_2(\text{H}_2\text{biim})](\text{CF}_3\text{SO}_3)_3(\text{H}_2\text{O})_{0.25}$  (orange), b)  $[\text{Cr}(\text{phen})_2(\text{Hbiim})](\text{CF}_3\text{SO}_3)_2(\text{H}_2\text{O})_{0.5}$  (red) and  $[\text{Cr}(\text{phen})_2(\text{biim})](\text{CF}_3\text{SO}_3)(\text{CH}_3\text{OH})_{1.5}$  (black).



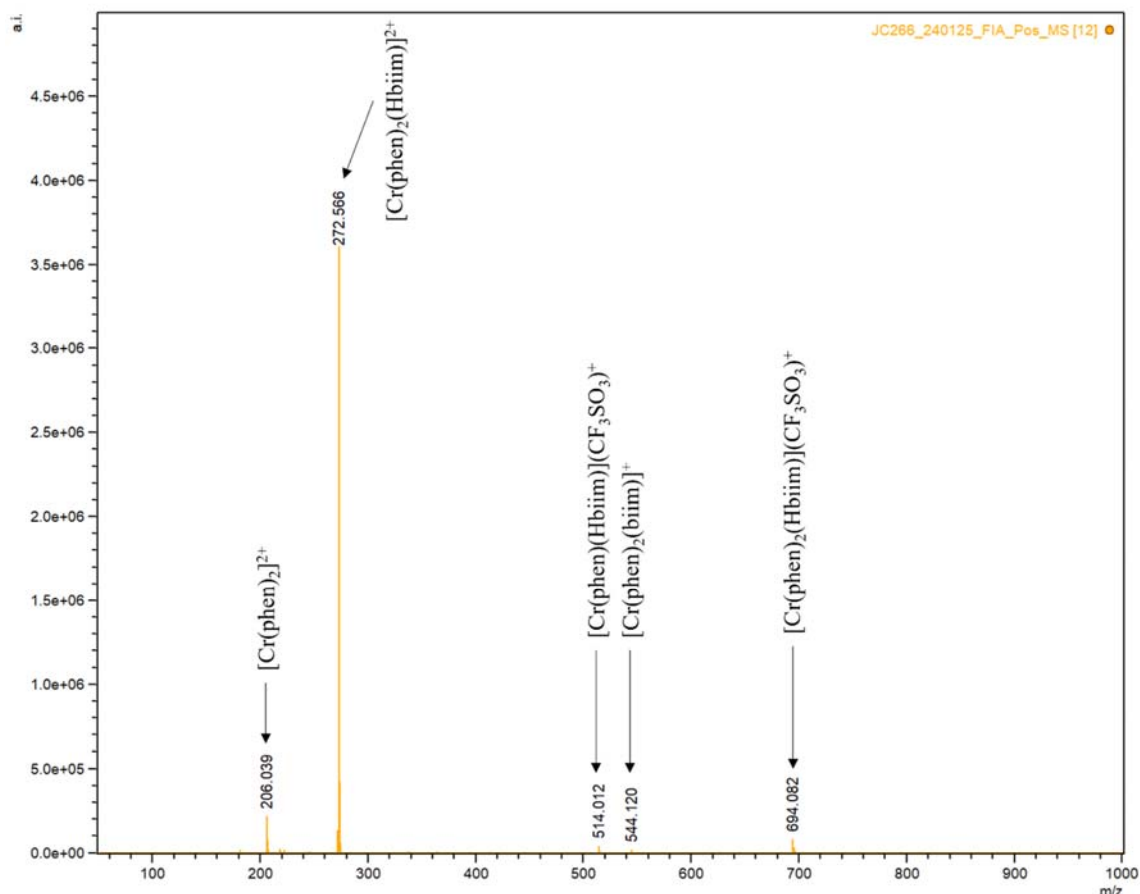

**Figure S58** ESI-MS full spectrum of the complex  $[\text{Cr}(\text{phen})_2(\text{H}_2\text{biim})](\text{CF}_3\text{SO}_3)_3$  in  $\text{CH}_3\text{CN}$ . The ESI-MS spectra of complexes  $[\text{Cr}(\text{phen})_2(\text{Hbiim})](\text{CF}_3\text{SO}_3)_2$  and  $[\text{Cr}(\text{phen})_2(\text{biim})](\text{CF}_3\text{SO}_3)$  are not depicted because they are identical to the spectrum of  $[\text{Cr}(\text{phen})_2(\text{H}_2\text{biim})](\text{CF}_3\text{SO}_3)_3$ .

**Table S41** Observed  $m/z$ , intensity and attribution of each peak observed in the ESI-MS spectrum of  $[\text{Cr}(\text{phen})_2(\text{H}_2\text{biim})](\text{CF}_3\text{SO}_3)_3$ .

| Peak n° | $m/z$   | I / a.u. | Attribution (fragment)                                               | Molecular formula                                                      | Calc. $m/z$ |
|---------|---------|----------|----------------------------------------------------------------------|------------------------------------------------------------------------|-------------|
| 1       | 206.039 | 2.16E+05 | $[\text{Cr}(\text{phen})_2]^{2+}$                                    | $\text{C}_{24}\text{H}_{16}\text{CrN}_4^{2+}$                          | 206.0385    |
| 2       | 272.566 | 3.56E+06 | $[\text{Cr}(\text{phen})_2(\text{Hbiim})]^{2+}$                      | $\text{C}_{30}\text{H}_{21}\text{CrN}_8^{2+}$                          | 272.5641    |
| 3       | 514.012 | 3.94E+04 | $[\text{Cr}(\text{phen})(\text{Hbiim})](\text{CF}_3\text{SO}_3)^+$   | $\text{C}_{19}\text{H}_{13}\text{CrF}_3\text{N}_6\text{O}_3\text{S}^+$ | 514.0122    |
| 4       | 544.120 | 1.79E+04 | $[\text{Cr}(\text{phen})_2(\text{biim})]^+$                          | $\text{C}_{30}\text{H}_{20}\text{CrN}_8^+$                             | 544.1211    |
| 5       | 694.082 | 7.90E+04 | $[\text{Cr}(\text{phen})_2(\text{Hbiim})](\text{CF}_3\text{SO}_3)^+$ | $\text{C}_{31}\text{H}_{21}\text{CrF}_3\text{N}_8\text{O}_3\text{S}^+$ | 694.0810    |

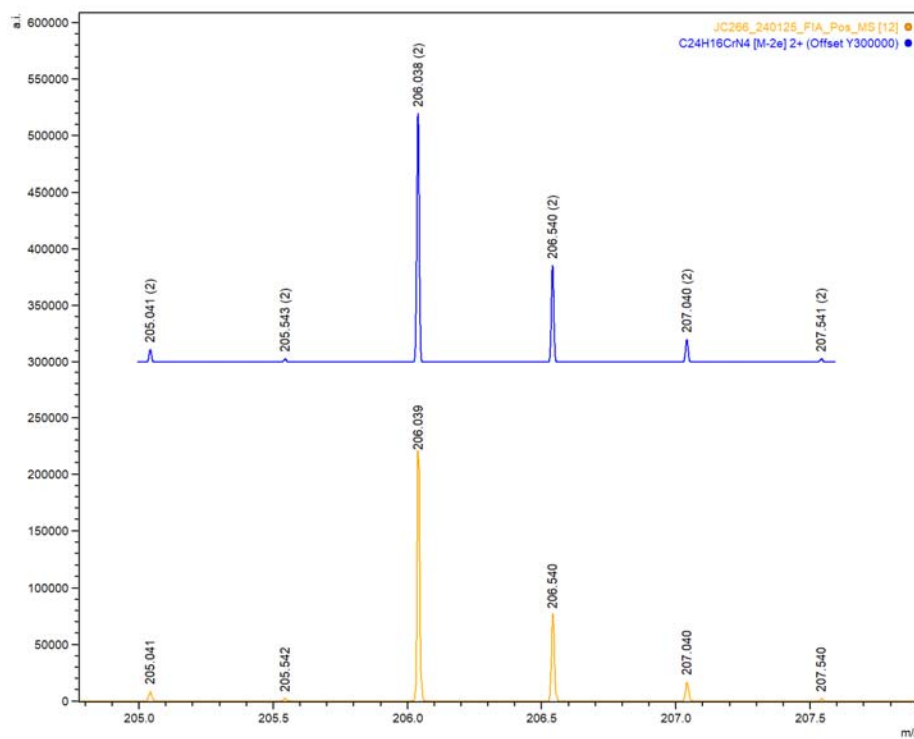

**Figure S58:** Experimental ESI-MS spectrum of complex  $[\text{Cr}(\text{phen})_2(\text{H}_2\text{biim})](\text{CF}_3\text{SO}_3)_3$  in  $\text{CH}_3\text{CN}$  (orange trace). Calculated peaks for  $[\text{Cr}(\text{phen})_2]^{2+}$ ,  $\text{C}_{24}\text{H}_{16}\text{CrN}_4^{2+}$  (blue trace).

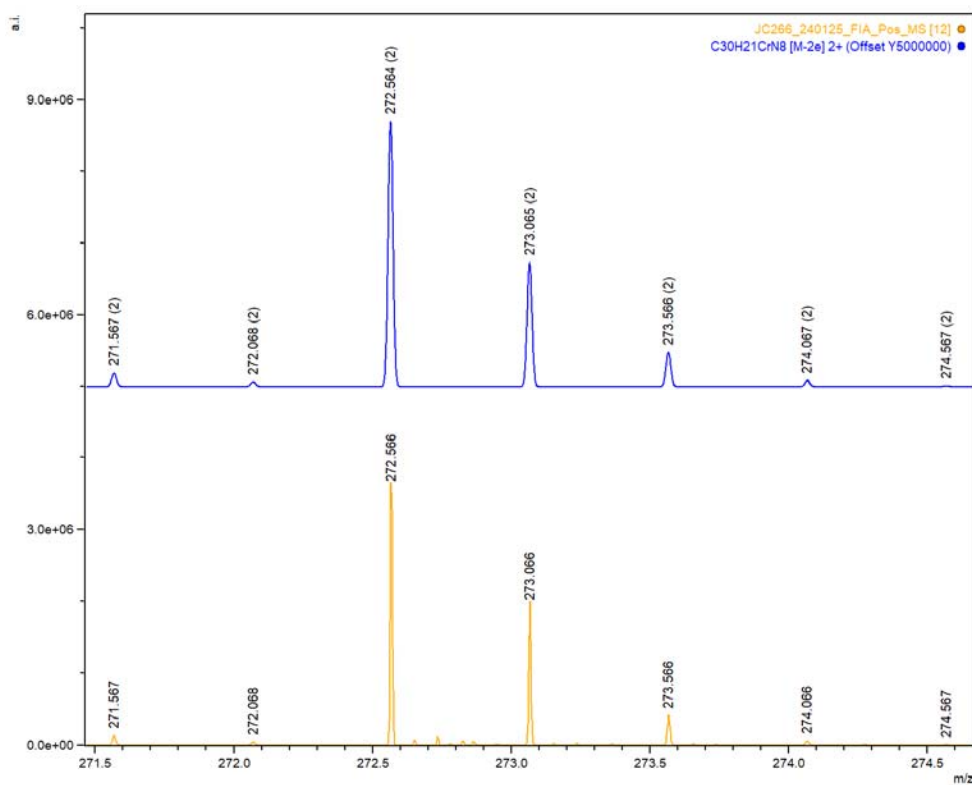

**Figure S59** Experimental ESI-MS spectrum of  $[\text{Cr}(\text{phen})_2(\text{H}_2\text{biim})](\text{CF}_3\text{SO}_3)_3$  in  $\text{CH}_3\text{CN}$  (orange trace) 1 (orange). Calculated peaks for  $[\text{Cr}(\text{phen})_2(\text{Hbiim})]^{2+}$ ,  $\text{C}_{30}\text{H}_{21}\text{CrN}_8^{2+}$  (blue trace).

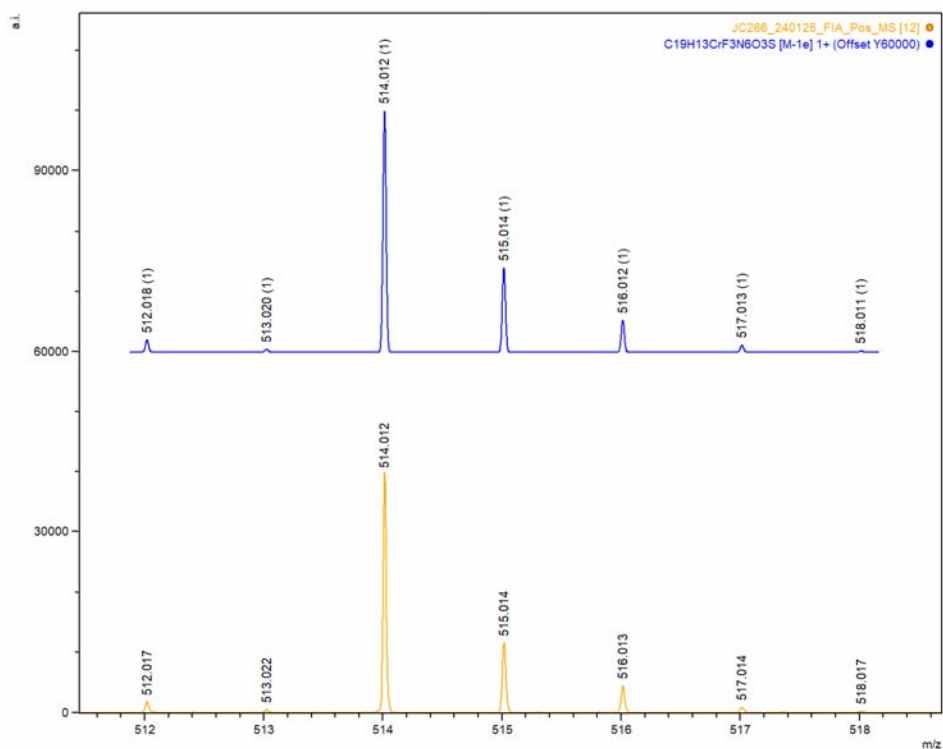

**Figure S60** Experimental ESI-MS spectrum of  $[\text{Cr}(\text{phen})_2(\text{H}_2\text{biim})](\text{CF}_3\text{SO}_3)_3$  in  $\text{CH}_3\text{CN}$  (orange trace). Calculated peaks for  $[\text{Cr}(\text{phen})(\text{Hbiim})](\text{CF}_3\text{SO}_3)^+$ ,  $\text{C}_{19}\text{H}_{13}\text{CrF}_3\text{N}_6\text{O}_3\text{S}^+$  (blue trace).

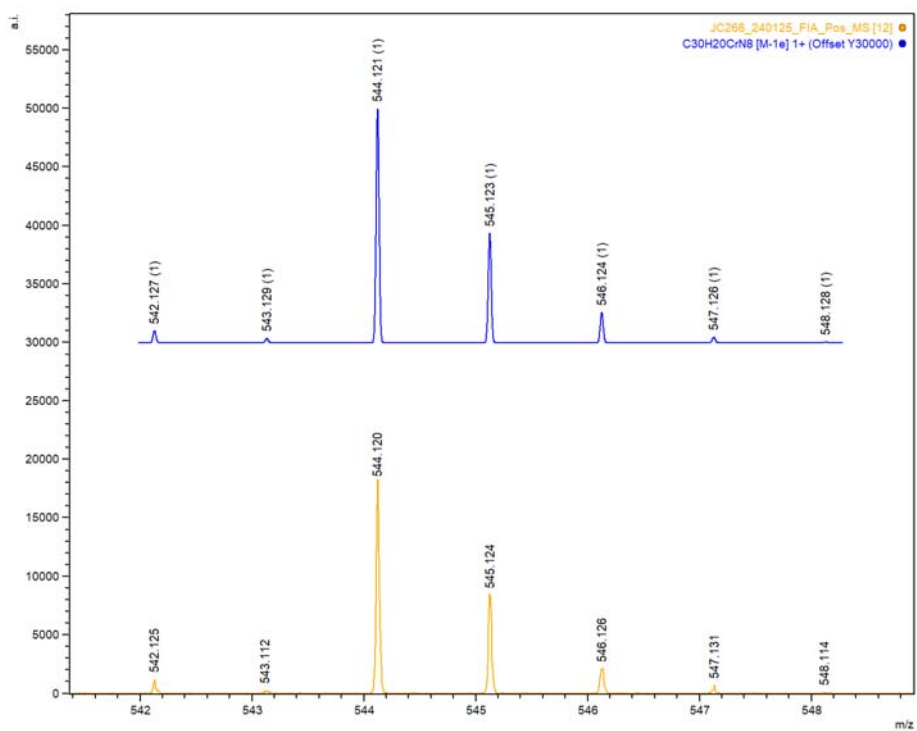

**Figure S61** Experimental ESI-MS spectrum of  $[\text{Cr}(\text{phen})_2(\text{H}_2\text{biim})](\text{CF}_3\text{SO}_3)_3$  in  $\text{CH}_3\text{CN}$  (orange trace). Calculated peaks for  $[\text{Cr}(\text{phen})_2(\text{biim})]^+$ ,  $\text{C}_{30}\text{H}_{20}\text{CrN}_8^+$  (blue trace).

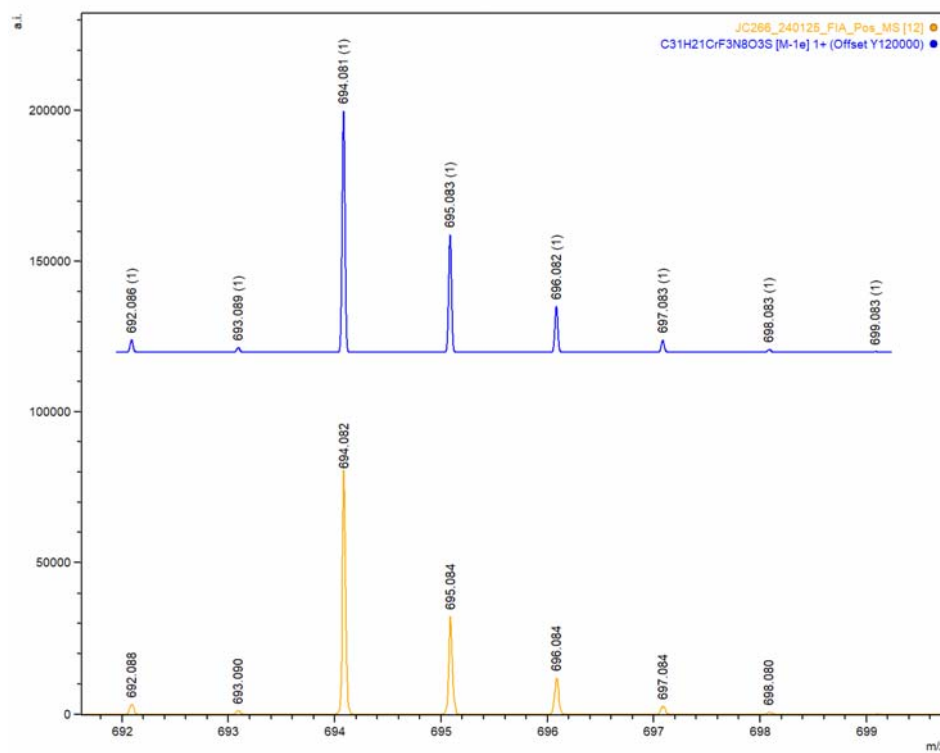

**Figure S62** Experimental ESI-MS spectrum of  $[\text{Cr}(\text{phen})_2(\text{H}_2\text{biim})](\text{CF}_3\text{SO}_3)_3$  in  $\text{CH}_3\text{CN}$  (orange trace). Calculated peaks for  $[\text{Cr}(\text{phen})_2(\text{Hbiim})](\text{CF}_3\text{SO}_3)^+$ ,  $\text{C}_{31}\text{H}_{21}\text{CrF}_3\text{N}_8\text{O}_3\text{S}^+$  (blue trace).

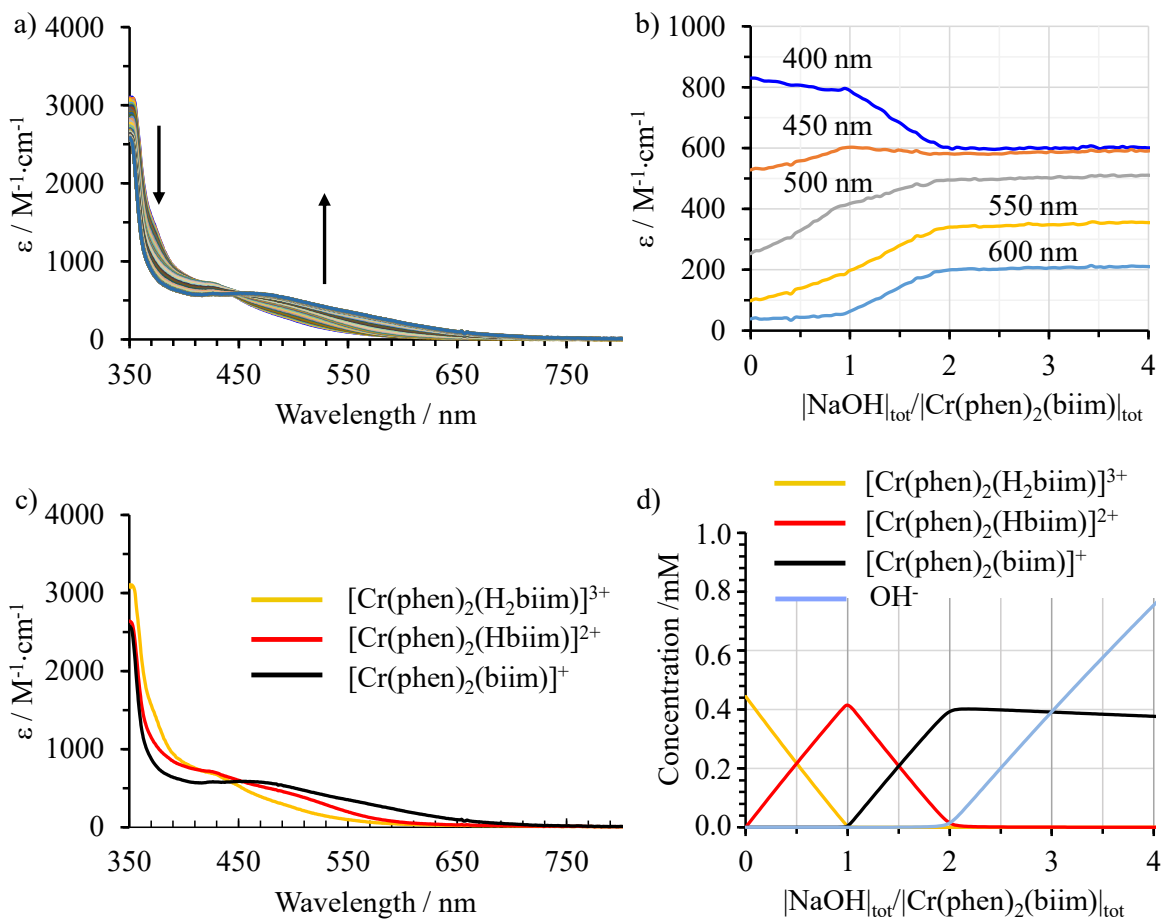

**Figure S63** Variation of a) absorption spectra and b) molar extinction coefficients after each addition of NaOH; c) deconvoluted absorption spectra of  $[\text{Cr}(\text{phen})_2(\text{H}_2\text{biim})]^{3+}$ ,  $[\text{Cr}(\text{phen})_2(\text{Hbiim})]^{2+}$  and  $[\text{Cr}(\text{phen})_2(\text{biim})]^+$  in  $\text{H}_2\text{O}$  and d) calculated concentration profiles of each species at each addition (bottom right).

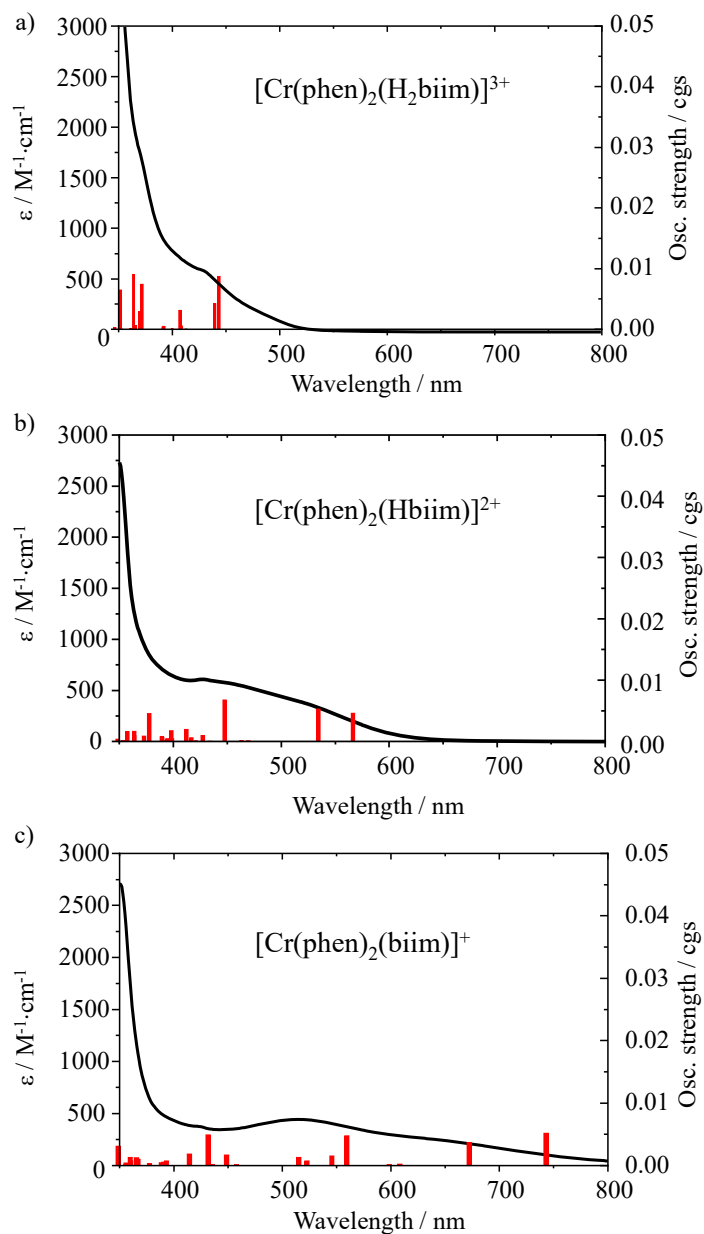

**Figure S64** Experimental (black traces) visible absorption spectra of a) [Cr(phen)<sub>2</sub>(H<sub>2</sub>biim)]<sup>3+</sup>, b) [Cr(phen)<sub>2</sub>(Hbiim)]<sup>2+</sup> and c) [Cr(phen)<sub>2</sub>(biim)]<sup>+</sup> in CH<sub>3</sub>CN and calculated oscillatory strengths (red bars) of the computed electronic transitions.

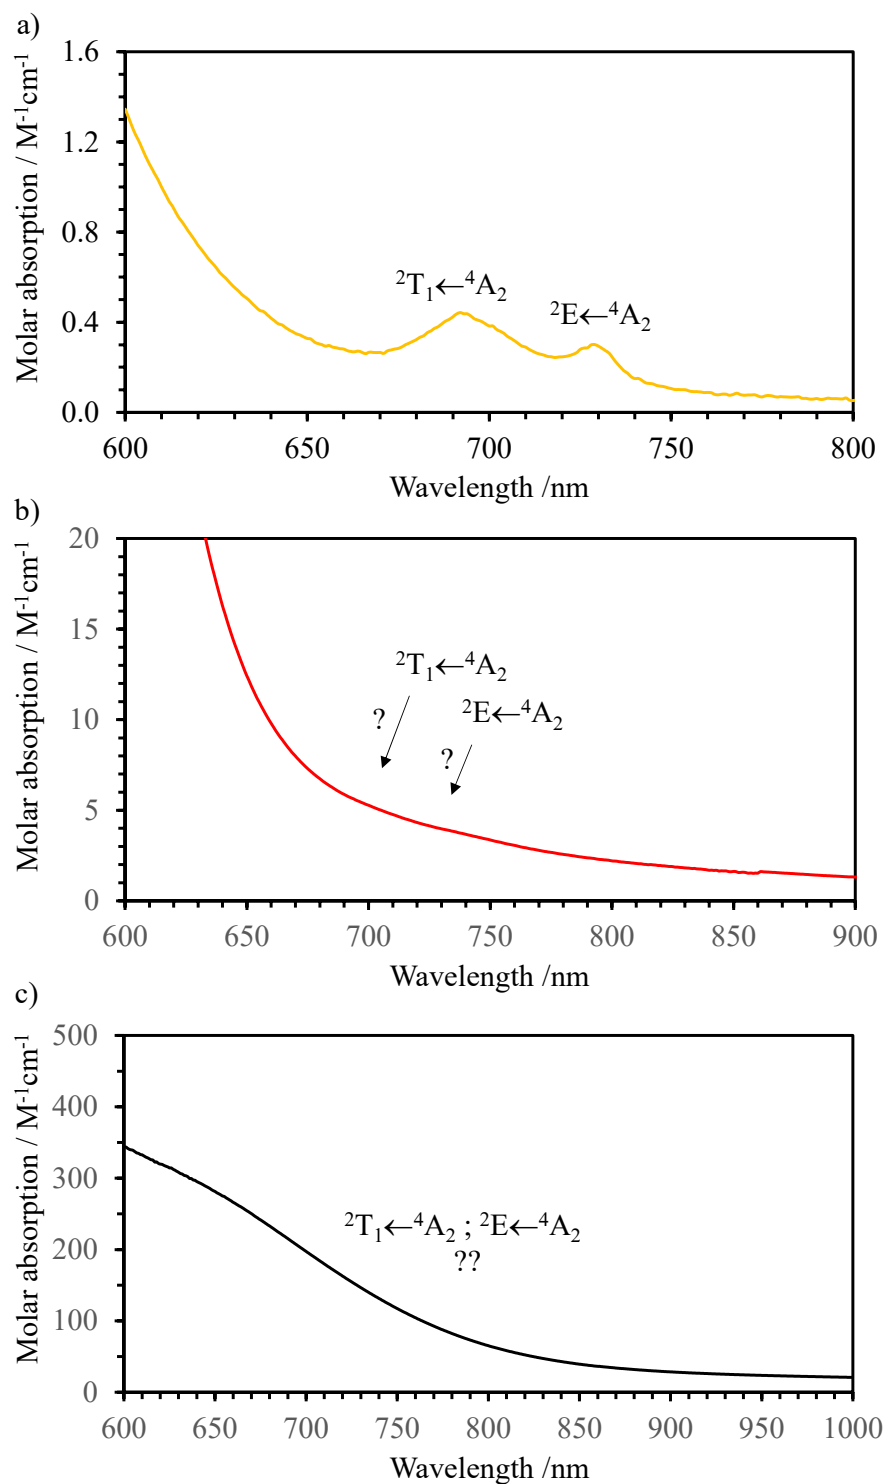

**Figure S65** NIR absorption spectra of a)  $[Cr(phen)_2(H_2biim)]^{3+}$ , b)  $[Cr(phen)_2(Hbiim)]^{2+}$  (red trace) and c)  $[Cr(phen)_2(biim)]^+$  (black trace) in  $CH_3CN$  ( $c \approx 10^{-2} mol \cdot L^{-1}$ ).

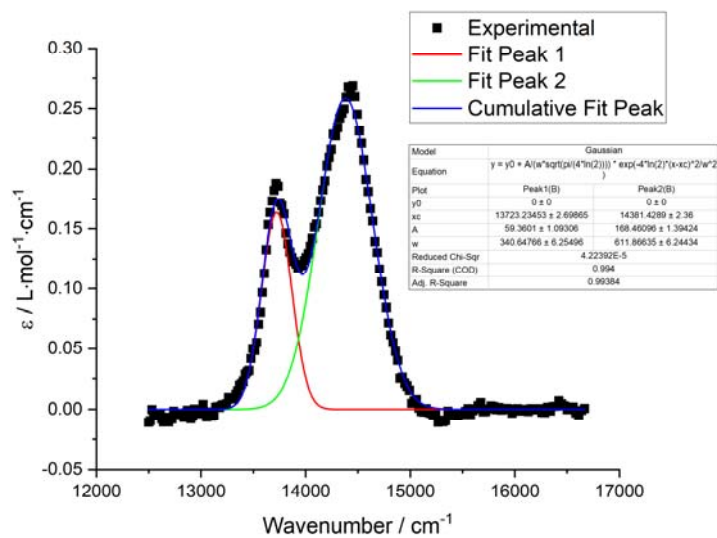

**Figure S66** Gaussian deconvolution of the absorption spectrum of  $[\text{Cr}(\text{phen})_2(\text{H}_2\text{biim})](\text{CF}_3\text{SO}_3)_3$  in  $\text{CH}_3\text{CN}$ ,  $c = 1.03 \cdot 10^{-2}$  M.



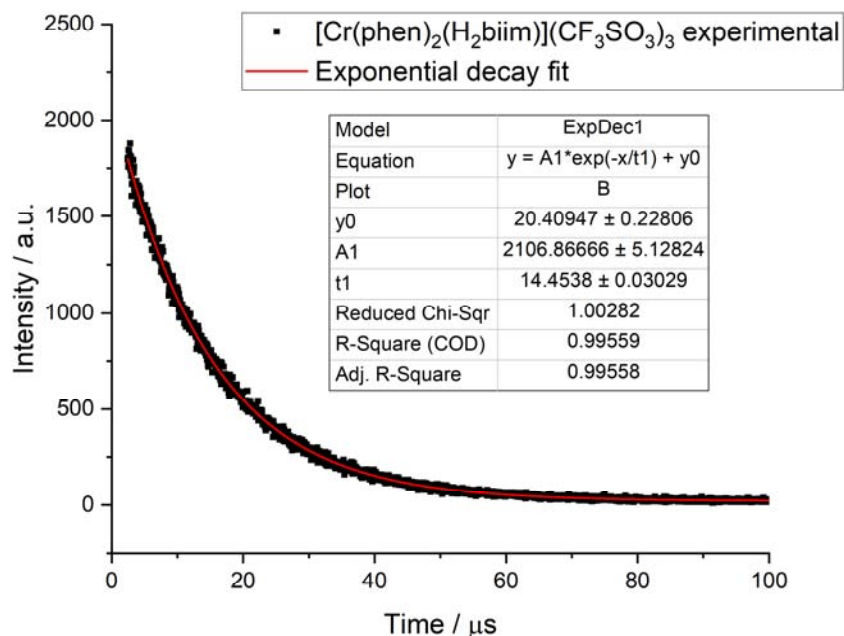

**Figure S67** Emission decay curve as function of time for the emission of  $\text{Cr}(^2\text{E} \rightarrow ^4\text{A}_2)$  transition of  $[\text{Cr}(\text{phen})_2(\text{H}_2\text{biim})]^{3+}$  in  $\text{CH}_3\text{CN}$  at 293K in aerated solution.  $\lambda_{\text{exc}} = 355 \text{ nm}$ ;  $\lambda_{\text{em}} = 730 \text{ nm}$ ;  $c = 1.0 \cdot 10^{-4} \text{ M}$ .

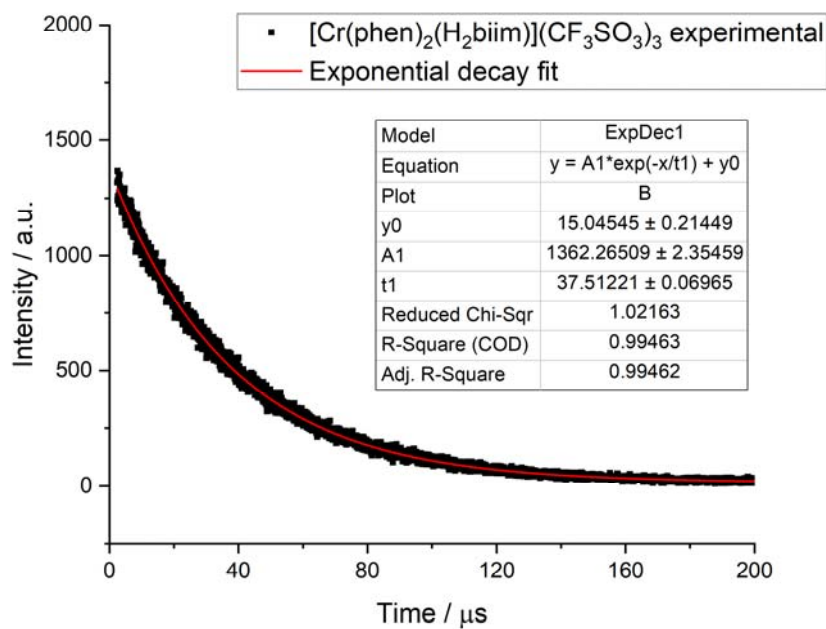

**Figure S68** Emission decay curve as function of time for the emission of  $\text{Cr}(^2\text{E} \rightarrow ^4\text{A}_2)$  transition of  $[\text{Cr}(\text{phen})_2(\text{H}_2\text{biim})]^{3+}$  in  $\text{CH}_3\text{CN}$  at 293K in deaerated solution.  $\lambda_{\text{exc}} = 355 \text{ nm}$ ;  $\lambda_{\text{em}} = 730 \text{ nm}$ ;  $c = 1.0 \cdot 10^{-4} \text{ M}$ .

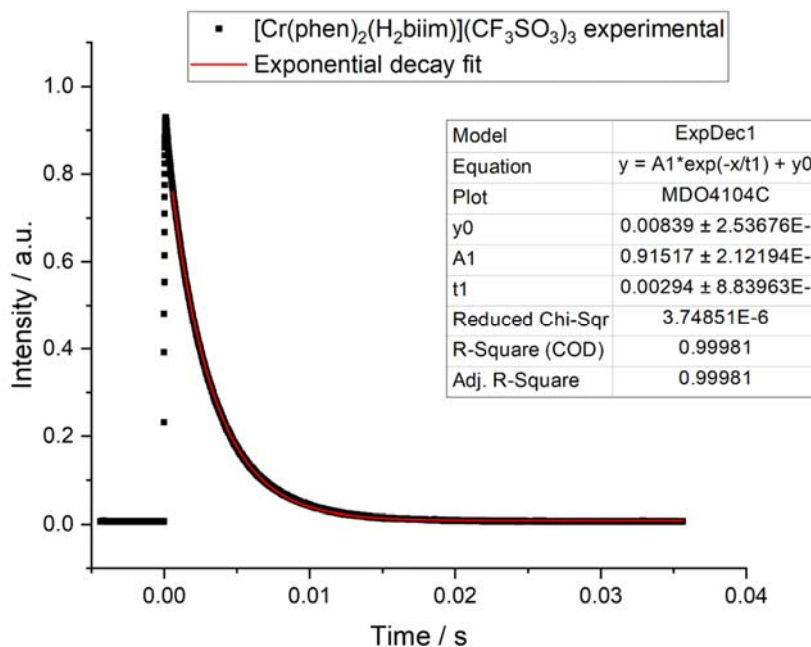

**Figure S69** Emission decay curve as function of time for the emission of  $\text{Cr}(^2\text{E} \rightarrow ^4\text{A}_2)$  transition of  $[\text{Cr}(\text{phen})_2(\text{H}_2\text{biim})]^{3+}$  in  $\text{CH}_3\text{CN}/\text{C}_2\text{H}_5\text{CN}$  6:4 at 77K in frozen solution.  $\lambda_{\text{exc}} = 355$  nm;  $\lambda_{\text{em}} = 730$  nm;  $c = 1.0 \cdot 10^{-4}$  M.

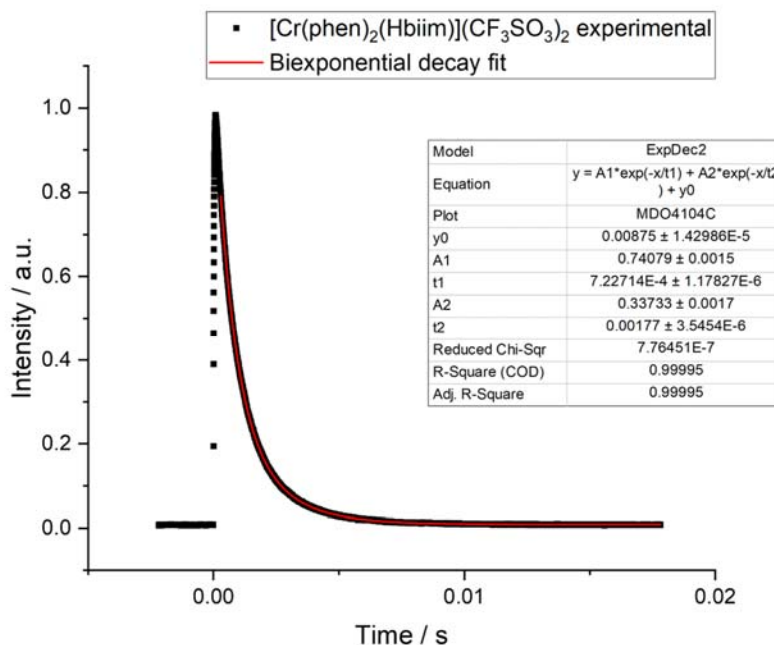

**Figure S70** Emission decay curve as function of time for the emission of  $\text{Cr}(^2\text{E} \rightarrow ^4\text{A}_2)$  transition of  $[\text{Cr}(\text{phen})_2(\text{Hbiim})]^{2+}$  in  $\text{CH}_3\text{CN}/\text{C}_2\text{H}_5\text{CN}$  6:4 at 77K in frozen solution.  $\lambda_{\text{exc}} = 355$  nm;  $\lambda_{\text{em}} = 750$  nm;  $c = 1.0 \cdot 10^{-4}$  M.

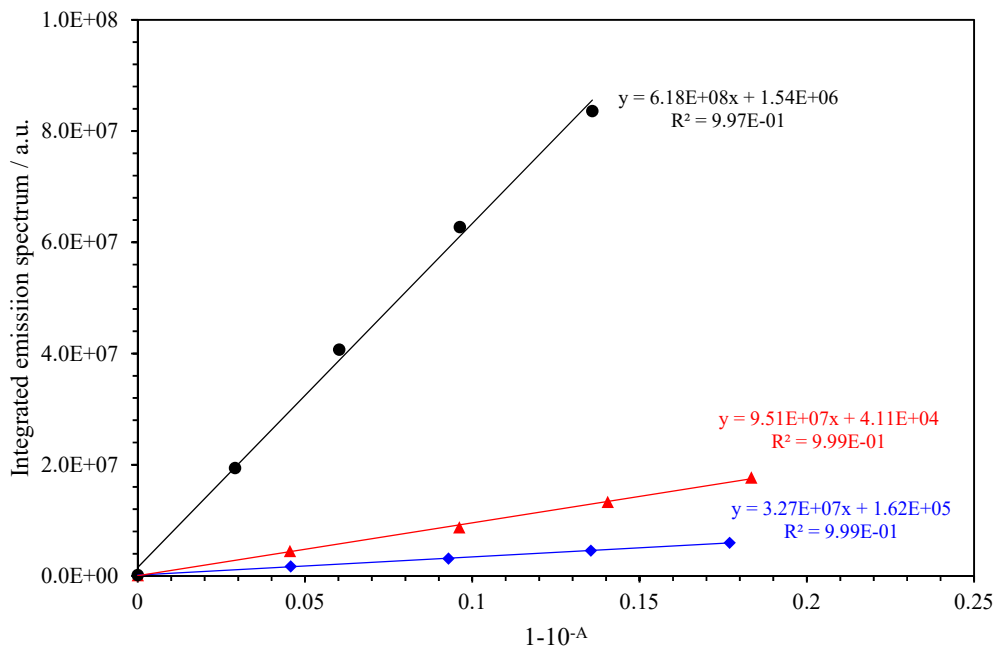

**Figure S71** Plot of  $\int I_i(\lambda)d\lambda$  as a function of  $(1 - 10^{-A(450\text{ nm})i})$  for complex  $[\text{Cr}(\text{phen})_2(\text{H}_2\text{biim})]^{3+}$  in aerated (blue trace) and deaerated (red trace) acetonitrile, and for  $[\text{Ru}(\text{bpy})_3]^{2+}$  in aerated acetonitrile (black). The relative method has been used:

$$\Phi_{\text{complex}} = \frac{\int I_{\text{complex}}(\lambda)d\lambda}{\int I_{\text{ref}}(\lambda)d\lambda} \left( \frac{n_{\text{complex}}}{n_{\text{ref}}} \right)^2 \frac{1 - 10^{-A_{\text{ref}}}}{1 - 10^{-A_{\text{complex}}}} \Phi_{\text{ref}} = \frac{\text{slope}_{\text{complex}}}{\text{slope}_{\text{ref}}} \Phi_{\text{ref}}$$

where  $\int I_i(\lambda)d\lambda$  is the integrated emission spectrum of the compound  $i$ ,  $n$  is the refractive index of the solvent and  $A_i$  is the absorbance of the solution of compound  $i$  at the excitation wavelength (450 nm here). The reference compound was  $[\text{Ru}(\text{bpy})_3](\text{PF}_6)_2$  for which the quantum yield is known to be  $1.8 \cdot 10^{-2}$  in aerated acetonitrile after excitation at 450 nm. (H. Ishida, S. Tobita, Y. Hasegawa, R. Katoh and K. Nozaki, *Coord. Chem. Rev.*, 2010, **254**, 2449-2458).
